# Supplementary material
Source: Royal Society of Chemistry journal article supplement (doi:10.1039/d6ob00593d)
Supplement: d6ob00593d1.pdf [file d6ob00593d1.pdf]

## *Supporting Information*

### NMM-promoted decarboxylative C(sp<sup>3</sup>)-C(sp<sup>3</sup>) coupling of coumarin-3-carboxylic acids and indolin-3-ones

Zhan-Yong Wang,<sup>a</sup> Can Zhang,<sup>a</sup> Xiao-Tian Wang,<sup>a</sup> Xiao-Jin Sun,<sup>a</sup> Yi-Lin Wang,<sup>a</sup>  
Ting Yang,<sup>b</sup> Chenyang Ma,<sup>c</sup> Ran Xia\*<sup>a</sup> and Hongxin Liu\*<sup>c, d</sup>

- a. School of Pharmacy, Xinxiang University, Xinxiang, China.
- b. Nursing College, Xinxiang University, Xinxiang, China.
- c. Henan Run Catalysts Co., Ltd., Xinxiang, China.
- d. College of Chemistry and Materials Engineering, Wenzhou University, Wenzhou, China.
- e. Institute of New Materials & Industrial Technology, Wenzhou University, Wenzhou, China.

### Table of contents

|                                                                                                                                                                                                 |           |
|-------------------------------------------------------------------------------------------------------------------------------------------------------------------------------------------------|-----------|
| <b>1. General Information</b> .....                                                                                                                                                             | <b>1</b>  |
| <b>2. The data of the products 3 and 4a</b> .....                                                                                                                                               | <b>4</b>  |
| <b>3. The NMR of 3 and 4a</b> .....                                                                                                                                                             | <b>17</b> |
| <b>4. Scanned copies of <sup>1</sup>H-NMR spectra of 3a (isolated from the experiment carried out in the presence of TEMPO, BHT as a radical scavenger) and the crude spectrum of 3ac</b> ..... | <b>47</b> |
| <b>5. The HPLC of 3a</b> .....                                                                                                                                                                  | <b>49</b> |
| <b>6 The data of crystal structure</b> .....                                                                                                                                                    | <b>51</b> |

## 1. General Information

NMR spectra were obtained in CDCl<sub>3</sub> using TMS as the internal standard at 400 (for <sup>1</sup>H NMR) or 100 MHz (for <sup>13</sup>C NMR), respectively. <sup>1</sup>H NMR spectra: J-values are reported in Hz. Organic solvents used were treated by general methods. Commercially obtained reagents were used without further purification. Column chromatography was performed using Huanghai 300-400 mesh silica gel at increased pressure. HRMS (m/z) were measured using Bruker Daltonics (TOF). The coumarin-3-carboxylic acids **1**<sup>1</sup> and the 1-acetyl-3-indolinone **2**<sup>2</sup> were prepared according to literature methods.

1. L. Wei, J. Wang, X. Zhang, P. Wang, Y. Zhao, J. Li, T. Hou, L. Qu, L. Shi, X. Liang and Y. Fang, *J. Med. Chem.* **2017**, 60, 362–372.
2. Q.-q. Zhang, F. Jin, J.-h. Yu, C. Zhang, M. Zhang, M.-z. Deng, S.-x. Lin, L. Chen, Y.-l. Zhao, B. He and Y. Li, *J. Org. Chem.* **2024**, 89, 10099–10111.

### **General procedure for the NMM-promoted decarboxylation of coumarin-3-carboxylic acids with indolin-3-ones.**

Under N<sub>2</sub> atmosphere, coumarin-3-carboxylic acids **1** (0.1 mmol), indolin-3-ones **2** (0.12 mmol), DCM (2.0 ml) were successively added into a reaction tube, then NMM (0.02 mmol) was added with stirring. The resulting mixture was continuously stirred at rt for 48 h. After completion and removal of the solvent, the product **3** was obtained by column chromatography on a silica gel column eluting with petroleum ether-ethyl acetate mixture (PE:EA = 3:1) in 51 - 98% yields.

### **The preliminary investigation of enantioselectivity of coumarin-3-carboxylic acids **1a** with the 1-acetyl-3-indolinone **2a**.**

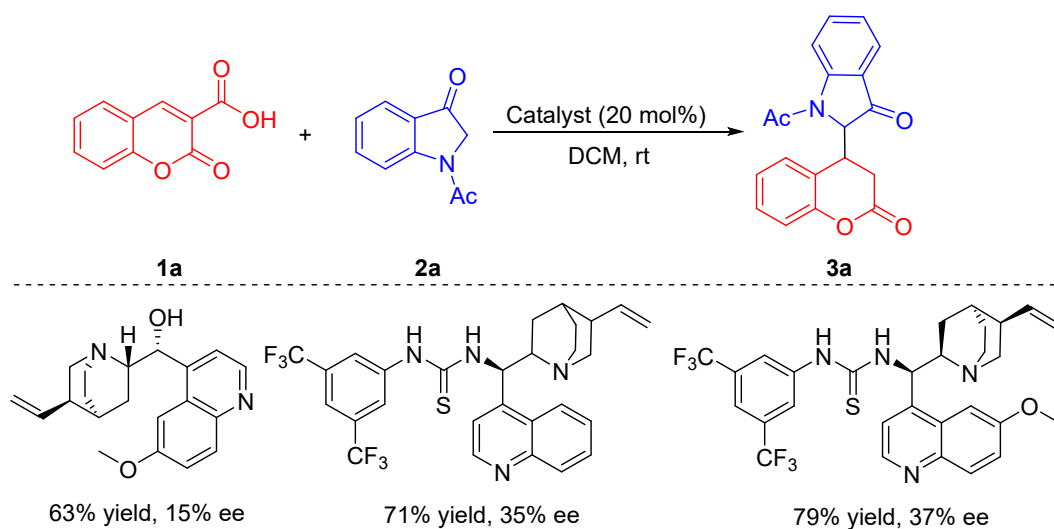

The preliminary investigation of enantioselectivity of coumarin-3-carboxylic acid **1a** and indolin-3-one **2b**.

Reaction conditions: **1a** (0.1 mmol), **2a** (0.12 mmol), catalyst (20 mol%) in dichloromethane (2.0 mL) at room temperature for 48 h. Isolated yields. Dr values ( all the products >20:1) were determined by crude <sup>1</sup>H NMR. Ee was determined via HPLC on chiral stationary phase: AD-H column, 80:20 hexane:IPA, flow rate 1 mL/min, 254 nm, 25 °C.

### Preparation of methyl 3-(1-acetyl-3-oxoindolin-2-yl)-3-(2-hydroxyphenyl)propanoate (**4a**)

To a solution of **3a** (0.1 mmol) in methanol (1 ml), NaOH (0.1 mmol) was added. The reaction mixture was stirred at rt until no more starting product was detectable by TLC analysis (0.5 h). Subsequently it was concentrated, and the resulting residue was purified by flash chromatography on SiO<sub>2</sub> gel (PE/EA= 3:1) to yield **4a** (99%) as a white solid.

## 2. The data of the products 3 and 4a

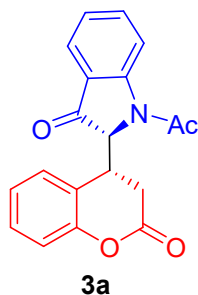

**1-acetyl-2-(2-oxochroman-4-yl)indolin-3-one 3a:** white solid, 88%,  $^1\text{H}$  NMR (400 MHz, DMSO)  $\delta$  8.13 (s, 1H), 7.62 (t,  $J = 7.7$  Hz, 1H), 7.41 (d,  $J = 7.5$  Hz, 1H), 7.11 (dt,  $J = 20.2, 7.3$  Hz, 3H), 6.96 – 6.81 (m, 2H), 4.96 (s, 1H), 3.94 (d,  $J = 6.9$  Hz, 1H), 3.26 (dd,  $J = 17.4, 8.9$  Hz, 1H), 3.04 (d,  $J = 17.4$  Hz, 1H), 2.32 (s, 3H);  $^{13}\text{C}$  NMR (100 MHz, DMSO)  $\delta$  198.4, 169.6, 166.0, 153.8, 151.7, 137.5, 129.9, 129.8, 124.8, 124.4, 124.2, 123.3, 119.4, 118.2, 117.0, 69.2, 37.0, 30.7, 24.4; HRMS-TOF:  $[\text{M} + \text{Na}]^+$  calcd for  $\text{C}_{19}\text{H}_{15}\text{NNaO}_4^+$ : 344.0893; found: 344.0905.

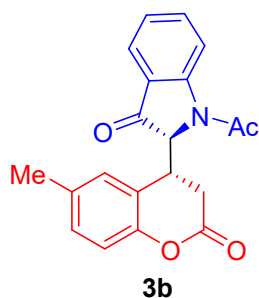

**1-acetyl-2-(6-methyl-2-oxochroman-4-yl)indolin-3-one 3b:** white solid, 74%,  $^1\text{H}$  NMR (400 MHz,  $\text{CDCl}_3$ )  $\delta$  7.87 (s, 1H), 7.64 (t,  $J = 7.1$  Hz, 2H), 7.16 (t,  $J = 7.0$  Hz, 1H), 7.00 (d,  $J = 10.5$  Hz, 2H), 6.84 (d,  $J = 7.9$  Hz, 1H), 4.68 (s, 1H), 3.85 (d,  $J = 5.2$  Hz, 1H), 2.84 – 2.57 (m, 2H), 2.23 (s, 6H);  $^{13}\text{C}$  NMR (100 MHz,  $\text{CDCl}_3$ )  $\delta$  197.2, 168.8, 166.1, 153.4, 149.8, 137.5, 134.2, 130.2, 128.9, 125.2, 124.7, 124.1, 120.0, 117.1, 69.3, 38.7, 30.3, 24.2, 20.6; HRMS-TOF:  $[\text{M} + \text{Na}]^+$  calcd for  $\text{C}_{20}\text{H}_{17}\text{NNaO}_4^+$ : 358.1050; found: 358.1055.

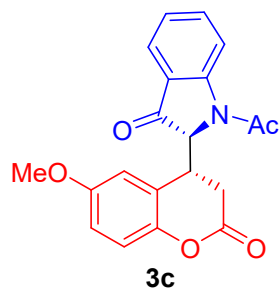

**1-acetyl-2-(6-methoxy-2-oxochroman-4-yl)indolin-3-one 3c:** white solid, 70%,  $^1\text{H NMR}$  (400 MHz,  $\text{CDCl}_3$ )  $\delta$  7.86 (s, 1H), 7.65 (t,  $J = 6.5$  Hz, 2H), 7.17 (t,  $J = 7.3$  Hz, 1H), 6.89 (d,  $J = 8.8$  Hz, 1H), 6.79 – 6.66 (m, 2H), 4.70 (s, 1H), 3.86 (d,  $J = 6.1$  Hz, 1H), 3.71 (s, 3H), 2.85 – 2.68 (m, 2H), 2.25 (s, 3H);  $^{13}\text{C NMR}$  (100 MHz,  $\text{CDCl}_3$ )  $\delta$  197.1, 168.8, 166.1, 156.2, 153.3, 145.8, 137.6, 125.2, 124.6, 124.2, 121.2, 118.2, 115.3, 113.1, 69.2, 55.7, 38.8, 30.2, 24.3; HRMS-TOF:  $[\text{M} + \text{Na}]^+$  calcd for  $\text{C}_{20}\text{H}_{17}\text{NNaO}_5^+$ : 374.0999; found: 374.1008.

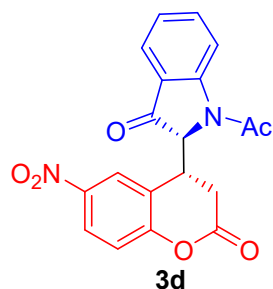

**1-acetyl-2-(6-nitro-2-oxochroman-4-yl)indolin-3-one 3d:** pale yellow solid, 51%,  $^1\text{H NMR}$  (400 MHz,  $\text{CDCl}_3$ )  $\delta$  8.10 (s, 2H), 7.67 (s, 2H), 7.57 (s, 1H), 7.15 (d,  $J = 41.5$  Hz, 2H), 4.83 (s, 1H), 4.15 (s, 1H), 2.99 (s, 2H), 2.56 (s, 3H);  $^{13}\text{C NMR}$  (100 MHz,  $\text{CDCl}_3$ )  $\delta$  196.5, 169.0, 164.2, 156.3, 152.4, 143.7, 137.9, 125.22, 125.16, 124.8, 124.7, 124.5, 121.6, 118.1, 116.3, 68.5, 37.3, 29.8, 25.1; HRMS-TOF:  $[\text{M} + \text{H}]^+$  calcd for  $\text{C}_{19}\text{H}_{15}\text{N}_2\text{O}_6^+$ : 367.0925; found: 367.0936.

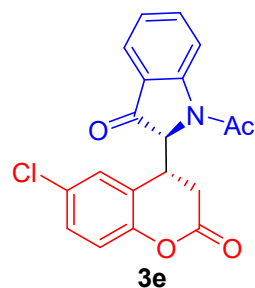

**1-acetyl-2-(6-chloro-2-oxochroman-4-yl)indolin-3-one 3e:** white solid, 62%,  $^1\text{H NMR}$  (400 MHz, DMSO)  $\delta$  8.15 (s, 1H), 7.65 (s, 1H), 7.42 (s, 1H), 7.11 (s, 1H), 6.96 (d,  $J = 6.8$  Hz, 3H), 4.98 (s, 1H), 3.93 (s, 1H), 3.28 (d,  $J = 18.5$  Hz, 1H), 3.06 (d,  $J = 16.9$  Hz, 1H), 2.35 (s, 3H);  $^{13}\text{C NMR}$  (100 MHz,

DMSO)  $\delta$  198.3, 169.7, 165.8, 153.8, 148.0, 137.7, 124.8, 124.5, 123.4, 121.3, 118.6, 118.2, 116.5, 116.4, 116.1, 69.0, 37.0, 30.2, 24.4; HRMS-TOF:  $[M + Na]^+$  calcd for  $C_{19}H_{14}ClNNaO_4^+$ : 378.0504; found: 378.0508.

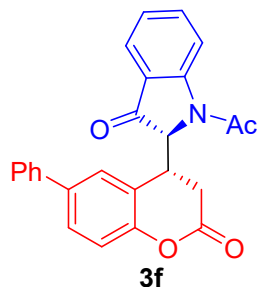

**1-acetyl-2-(2-oxo-6-phenylchroman-4-yl)indolin-3-one 3f**: white solid, 80%,  $^1H$  NMR (400 MHz,  $CDCl_3$ )  $\delta$  7.87 (s, 1H), 7.63 (d,  $J = 10.5$  Hz, 2H), 7.39 (d,  $J = 19.5$  Hz, 7H), 7.16 (t,  $J = 6.9$  Hz, 1H), 7.03 (d,  $J = 8.2$  Hz, 1H), 4.75 (s, 1H), 4.01 (s, 1H), 3.04 – 2.88 (m, 2H), 2.33 (s, 3H);  $^{13}C$  NMR (100 MHz,  $CDCl_3$ )  $\delta$  197.1, 168.7, 165.8, 153.2, 151.3, 139.6, 137.7, 137.6, 128.9, 128.3, 127.6, 127.2, 126.8, 125.2, 124.6, 124.3, 120.3, 117.7, 69.2, 38.4, 30.5, 24.4; HRMS-TOF:  $[M + Na]^+$  calcd for  $C_{25}H_{19}NNaO_4^+$ : 420.1206; found: 420.1213.

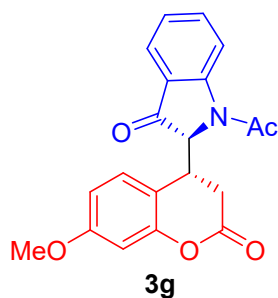

**1-acetyl-2-(7-methoxy-2-oxochroman-4-yl)indolin-3-one 3g**: white solid, 78%,  $^1H$  NMR (400 MHz,  $CDCl_3$ )  $\delta$  7.62 – 7.60 (m, 1H), 7.38 – 7.53 (m, 1H), 7.30 – 7.27 (m, 3H), 7.13 – 7.11 (m, 1H), 6.92 (t,  $J = 7.5$  Hz, 1H), 6.88 (d,  $J = 8.2$  Hz, 1H), 4.64 (dd,  $J = 8.9, 2.6$  Hz, 1H), 3.77 (s, 3H), 3.35 (dd,  $J = 16.7, 8.9$  Hz, 1H), 3.08 (dd,  $J = 16.7, 2.7$  Hz, 1H);  $^{13}C$  NMR (100 MHz,  $CDCl_3$ )  $\delta$  197.3, 168.8, 165.9, 160.6, 152.8, 151.3, 137.5, 131.8, 129.3, 125.1, 124.7, 124.1, 115.2, 111.6, 111.0, 69.4, 55.5, 37.7, 30.6, 24.4; HRMS-TOF:  $[M + Na]^+$  calcd for  $C_{20}H_{17}NNaO_5^+$ : 374.0999; found: 374.1007.

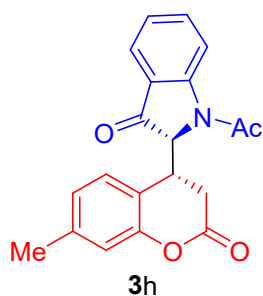

**1-acetyl-2-(7-methyl-2-oxochroman-4-yl)indolin-3-one 3h:** white solid, 81%,  $^1\text{H}$  NMR (400 MHz,  $\text{CDCl}_3$ )  $\delta$  7.87 (s, 1H), 7.62 (t,  $J = 8.8$  Hz, 2H), 7.14 (t,  $J = 7.3$  Hz, 1H), 7.04 (d,  $J = 7.6$  Hz, 1H), 6.81 (d,  $J = 7.7$  Hz, 1H), 6.75 (s, 1H), 4.67 (s, 1H), 3.89 (d,  $J = 5.6$  Hz, 1H), 2.91 – 2.70 (m, 2H), 2.26 (s, 6H);  $^{13}\text{C}$  NMR (100 MHz,  $\text{CDCl}_3$ )  $\delta$  197.3, 168.8, 166.1, 153.3, 151.7, 140.1, 137.5, 128.4, 125.4, 125.1, 124.5, 124.1, 117.7, 117.0, 69.3, 38.0, 30.5, 24.3, 21.1; HRMS-TOF:  $[\text{M} + \text{Na}]^+$  calcd for  $\text{C}_{20}\text{H}_{17}\text{NNaO}_4^+$ : 358.1050; found: 358.1059.

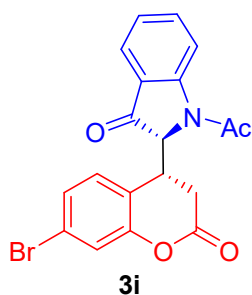

**1-acetyl-2-(7-bromo-2-oxochroman-4-yl)indolin-3-one 3i:** white solid, 70%,  $^1\text{H}$  NMR (400 MHz,  $\text{CDCl}_3$ )  $\delta$  7.65 (t,  $J = 7.3$  Hz, 3H), 7.18 (t,  $J = 7.2$  Hz, 1H), 7.12 (d,  $J = 7.9$  Hz, 2H), 7.02 (d,  $J = 7.9$  Hz, 1H), 4.71 (s, 1H), 3.92 (s, 1H), 2.93 – 2.78 (m, 2H), 2.38 (s, 3H);  $^{13}\text{C}$  NMR (100 MHz,  $\text{CDCl}_3$ )  $\delta$  196.9, 168.9, 165.2, 152.9, 152.4, 137.7, 129.7, 127.5, 125.1, 124.7, 124.5, 122.6, 120.6, 119.4, 68.9, 37.7, 30.3, 24.7; HRMS-TOF:  $[\text{M} + \text{H}]^+$  calcd for  $\text{C}_{19}\text{H}_{15}\text{BrNO}_4^+$ : 400.0179; found: 400.0188.

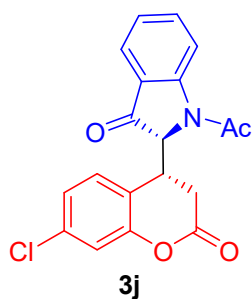

**1-acetyl-2-(7-chloro-2-oxochroman-4-yl)indolin-3-one 3j:** white solid, 80%,  $^1\text{H}$  NMR (400 MHz,  $\text{CDCl}_3$ )  $\delta$  7.66 (d,  $J = 6.9$  Hz, 3H), 7.20 (t,  $J = 6.6$  Hz, 1H), 7.10 (d,  $J = 7.7$  Hz, 1H), 6.99 (d,  $J = 8.0$  Hz, 2H), 4.73 (s, 1H), 3.95 (s, 1H), 2.98 – 2.80 (m, 2H), 2.40 (s, 3H);  $^{13}\text{C}$  NMR (100 MHz,  $\text{CDCl}_3$ )  $\delta$  196.9,

168.8, 165.2, 152.9, 152.3, 137.7, 134.9, 129.5, 125.1, 124.7, 124.6, 124.5, 118.9, 117.7, 68.9, 37.6, 30.3, 24.7; HRMS-TOF:  $[M + H]^+$  calcd for  $C_{19}H_{15}ClNO_4^+$ : 356.0684; found: 356.0693.

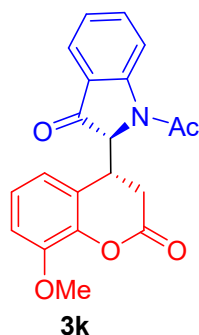

**1-acetyl-2-(8-methoxy-2-oxochroman-4-yl)indolin-3-one 3k:** white solid, 82%,  $^1H$  NMR (400 MHz,  $CDCl_3$ )  $\delta$  7.85 (s, 1H), 7.63 (d,  $J = 6.8$  Hz, 2H), 7.16 (t,  $J = 7.2$  Hz, 1H), 6.97 (t,  $J = 7.7$  Hz, 1H), 6.79 (dd,  $J = 13.9, 7.9$  Hz, 2H), 4.72 (s, 1H), 3.92 (s, 1H), 3.81 (s, 3H), 2.85 (dd,  $J = 16.8, 7.8$  Hz, 1H), 2.74 (d,  $J = 16.8$  Hz, 1H), 2.24 (s, 3H);  $^{13}C$  NMR (100 MHz,  $CDCl_3$ )  $\delta$  197.1, 168.9, 165.3, 153.3, 147.7, 141.4, 137.5, 125.1, 124.6, 124.1, 121.4, 119.9, 117.8, 112.1, 69.2, 56.1, 38.7, 30.2, 24.3; HRMS-TOF:  $[M + Na]^+$  calcd for  $C_{20}H_{17}NNaO_5^+$ : 374.0999; found: 374.1006.

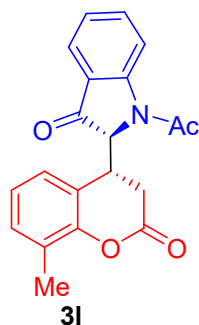

**1-acetyl-2-(8-methyl-2-oxochroman-4-yl)indolin-3-one 3l:** white solid, 89%,  $^1H$  NMR (400 MHz,  $CDCl_3$ )  $\delta$  7.88 (s, 1H), 7.63 (t,  $J = 7.0$  Hz, 2H), 7.16 (t,  $J = 7.3$  Hz, 1H), 7.07 (d,  $J = 7.1$  Hz, 1H), 7.01 (d,  $J = 7.0$  Hz, 1H), 6.92 (t,  $J = 7.3$  Hz, 1H), 4.68 (s, 1H), 3.90 (d,  $J = 5.6$  Hz, 1H), 2.81 (dt,  $J = 30.6, 12.3$  Hz, 2H), 2.24 (s, 3H), 2.18 (s, 3H);  $^{13}C$  NMR (100 MHz,  $CDCl_3$ )  $\delta$  197.2, 168.8, 166.0, 153.4, 150.2, 137.5, 131.2, 126.8, 126.1, 125.2, 124.6, 124.1, 120.1, 117.7, 69.4, 38.8, 30.3, 24.1, 15.7; HRMS-TOF:  $[M + Na]^+$  calcd for  $C_{20}H_{17}NNaO_4^+$ : 358.1050; found: 358.1063.

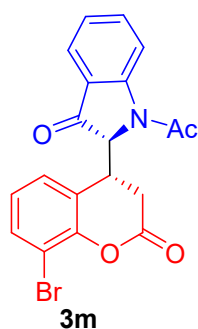

**1-acetyl-2-(8-bromo-2-oxochroman-4-yl)indolin-3-one 3m:** white solid, 65%,  $^1\text{H}$  NMR (400 MHz,  $\text{CDCl}_3$ )  $\delta$  7.67 (dd,  $J = 13.3, 7.5$  Hz, 3H), 7.46 (d,  $J = 7.8$  Hz, 1H), 7.20 (t,  $J = 7.2$  Hz, 1H), 7.15 (d,  $J = 7.5$  Hz, 1H), 6.91 (t,  $J = 7.6$  Hz, 1H), 4.75 (s, 1H), 3.94 (d,  $J = 6.0$  Hz, 1H), 2.82 (dt,  $J = 30.9, 12.2$  Hz, 2H), 2.34 (s, 3H);  $^{13}\text{C}$  NMR (100 MHz,  $\text{CDCl}_3$ )  $\delta$  196.8, 168.9, 164.9, 153.0, 149.0, 137.7, 133.5, 127.6, 125.24, 125.16, 124.7, 124.5, 122.7, 117.2, 111.2, 69.0, 38.9, 30.2, 24.5; HRMS-TOF:  $[\text{M} + \text{H}]^+$  calcd for  $\text{C}_{19}\text{H}_{15}\text{BrNO}_4^+$ : 400.0179; found: 400.0185.

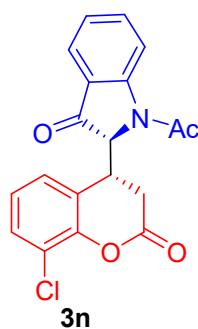

**1-acetyl-2-(8-chloro-2-oxochroman-4-yl)indolin-3-one 3n:** white solid, 69%,  $^1\text{H}$  NMR (400 MHz,  $\text{CDCl}_3$ )  $\delta$  7.68 (d,  $J = 6.5$  Hz, 3H), 7.26 (s, 1H), 7.19 (s, 1H), 7.10 (d,  $J = 7.1$  Hz, 1H), 6.96 (t,  $J = 7.4$  Hz, 1H), 4.75 (s, 1H), 3.94 (s, 1H), 2.83 (dt,  $J = 29.1, 12.1$  Hz, 2H), 2.34 (s, 3H);  $^{13}\text{C}$  NMR (100 MHz,  $\text{CDCl}_3$ )  $\delta$  196.8, 168.8, 164.8, 153.0, 148.0, 137.7, 130.4, 126.8, 125.2, 124.7, 124.6, 124.5, 122.7, 122.3, 117.2, 69.0, 38.7, 30.1, 24.5; HRMS-TOF:  $[\text{M} + \text{H}]^+$  calcd for  $\text{C}_{19}\text{H}_{15}\text{ClNO}_4^+$ : 356.0684; found: 356.0690.

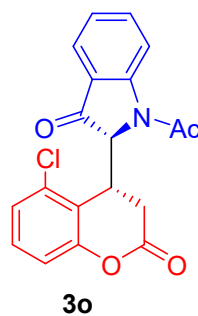

**1-acetyl-2-(5-chloro-2-oxochroman-4-yl)indolin-3-one 3o:** white solid, 65%,  $^1\text{H}$  NMR (400 MHz,  $\text{CDCl}_3$ )  $\delta$  7.87 – 7.67 (m, 3H), 7.25 (dd,  $J = 13.7, 7.3$  Hz, 3H), 6.97 (d,  $J = 7.6$  Hz, 1H), 4.95 (s, 1H),

4.24 (d,  $J = 6.8$  Hz, 1H), 2.65 (dd,  $J = 17.0, 7.3$  Hz, 1H), 2.41 (s, 1H), 2.09 (s, 3H);  $^{13}\text{C}$  NMR (100 MHz,  $\text{CDCl}_3$ )  $\delta$  196.8, 169.1, 165.6, 153.7, 153.2, 137.7, 133.6, 130.2, 125.7, 124.8, 124.2, 121.0, 118.0, 116.0, 67.2, 37.9, 29.5, 23.7; HRMS-TOF:  $[\text{M} + \text{H}]^+$  calcd for  $\text{C}_{19}\text{H}_{15}\text{ClNO}_4^+$ : 356.0684; found: 356.0689.

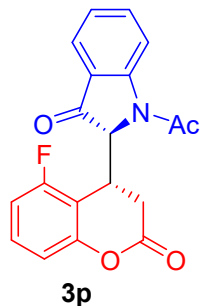

**1-acetyl-2-(5-fluoro-2-oxochroman-4-yl)indolin-3-one 3p**: white solid, 68%,  $^1\text{H}$  NMR (400 MHz,  $\text{CDCl}_3$ )  $\delta$  7.66 (t,  $J = 15.3$  Hz, 3H), 7.24 – 7.10 (m, 2H), 6.77 (d,  $J = 6.1$  Hz, 2H), 4.78 (s, 1H), 4.31 (s, 1H), 2.93 – 2.77 (m, 2H), 2.35 (s, 3H);  $^{13}\text{C}$  NMR (100 MHz,  $\text{CDCl}_3$ )  $\delta$  197.0, 168.8, 165.1, 161.3, 158.8, 152.9 (d,  $J = 6.3$  Hz), 137.5, 130.3 (d,  $J = 9.8$  Hz), 125.0, 124.4, 116.9, 113.1 (d,  $J = 3.0$  Hz), 111.1 (d,  $J = 22.0$  Hz), 109.1 (d,  $J = 21.0$  Hz), 68.1, 32.5, 30.0, 24.4; HRMS-TOF:  $[\text{M} + \text{Na}]^+$  calcd for  $\text{C}_{19}\text{H}_{14}\text{FNNaO}_4^+$ : 362.0799; found: 362.0809.

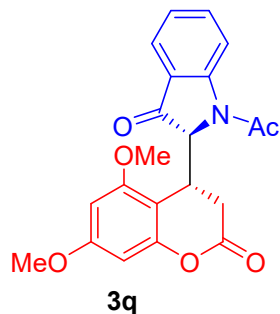

**1-acetyl-2-(5,7-dimethoxy-2-oxochroman-4-yl)indolin-3-one 3q**: white solid, 92%,  $^1\text{H}$  NMR (400 MHz,  $\text{CDCl}_3$ )  $\delta$  8.11 (s, 1H), 7.65 (dd,  $J = 17.0, 7.9$  Hz, 2H), 7.19 (t,  $J = 7.2$  Hz, 1H), 6.18 (d,  $J = 9.7$  Hz, 2H), 4.69 (s, 1H), 4.15 (d,  $J = 6.0$  Hz, 1H), 3.85 (s, 3H), 3.76 (s, 3H), 2.75 – 2.56 (m, 2H), 2.07 (s, 3H);  $^{13}\text{C}$  NMR (100 MHz,  $\text{CDCl}_3$ )  $\delta$  197.7, 168.8, 165.9, 161.4, 157.8, 153.9, 153.5, 137.5, 125.0, 124.5, 123.7, 118.4, 101.7, 94.8, 94.0, 68.3, 56.0, 55.6, 33.7, 30.2, 23.5; HRMS-TOF:  $[\text{M} + \text{Na}]^+$  calcd for  $\text{C}_{21}\text{H}_{19}\text{NNaO}_6^+$ : 404.1105; found: 404.1112.

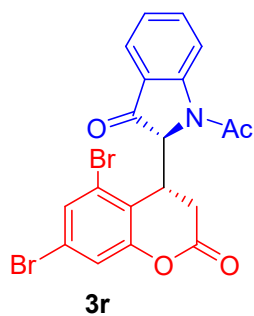

**1-acetyl-2-(5,7-dibromo-2-oxochroman-4-yl)indolin-3-one 3r:** yellow solid, 66%,  $^1\text{H NMR}$  (400 MHz,  $\text{CDCl}_3$ )  $\delta$  7.73 (d,  $J = 7.2$  Hz, 3H), 7.62 (s, 1H), 7.31 (s, 1H), 7.25 (t,  $J = 7.2$  Hz, 1H), 4.79 (s, 1H), 3.93 (d,  $J = 5.7$  Hz, 1H), 2.81 (dt,  $J = 28.1, 12.4$  Hz, 2H), 2.45 (s, 3H);  $^{13}\text{C NMR}$  (100 MHz,  $\text{CDCl}_3$ )  $\delta$  196.5, 168.9, 164.4, 152.8, 148.3, 137.9, 135.5, 130.4, 125.3, 124.8, 124.7, 124.5, 116.8, 111.8, 68.7, 38.6, 29.8, 24.7; HRMS-TOF:  $[\text{M} + \text{Na}]^+$  calcd for  $\text{C}_{19}\text{H}_{13}\text{Br}_2\text{NNaO}_4^+$ : 499.9104; found: 499.9109.

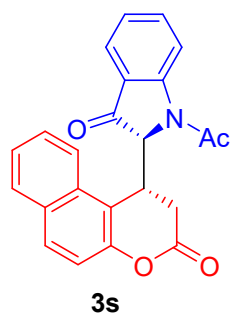

**1-acetyl-2-(2-oxo-3,4-dihydro-2H-benzo[g]chromen-4-yl)indolin-3-one 3s:** yellow solid, 61%,  $^1\text{H NMR}$  (400 MHz,  $\text{CDCl}_3$ )  $\delta$  8.55 (s, 1H), 7.90 (d,  $J = 8.0$  Hz, 2H), 7.74 (dd,  $J = 14.1, 7.1$  Hz, 2H), 7.67 (s, 1H), 7.52 (d,  $J = 7.0$  Hz, 2H), 7.28 (d,  $J = 7.9$  Hz, 2H), 4.96 (s, 1H), 4.81 (s, 1H), 2.81 (s, 2H), 2.64 (s, 3H);  $^{13}\text{C NMR}$  (100 MHz,  $\text{CDCl}_3$ )  $\delta$  195.9, 168.8, 166.2, 151.9, 150.9, 137.4, 131.2, 131.1, 130.7, 129.0, 127.9, 125.4, 125.2, 124.9, 123.4, 117.4, 65.9, 33.1, 29.0, 25.6; HRMS-TOF:  $[\text{M} + \text{H}]^+$  calcd for  $\text{C}_{23}\text{H}_{18}\text{NO}_4^+$ : 372.1230; found: 372.1237.

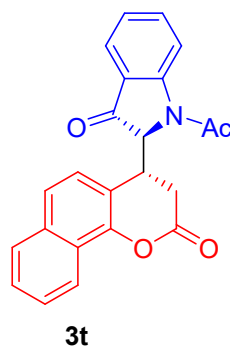

**1-acetyl-2-(2-oxo-3,4-dihydro-2H-benzo[h]chromen-4-yl)indolin-3-one 3t:** yellow solid, 80%, <sup>1</sup>H NMR (400 MHz, CDCl<sub>3</sub>) δ 8.21 (d, *J* = 7.2 Hz, 1H), 7.87 (s, 1H), 7.73 (d, *J* = 7.0 Hz, 1H), 7.59 (dd, *J* = 13.8, 7.4 Hz, 2H), 7.50 (d, *J* = 7.7 Hz, 3H), 7.23 (d, *J* = 8.2 Hz, 1H), 7.10 (t, *J* = 7.2 Hz, 1H), 4.77 (s, 1H), 4.06 (d, *J* = 5.4 Hz, 1H), 2.95 (dt, *J* = 31.9, 12.3 Hz, 2H), 2.18 (s, 3H); <sup>13</sup>C NMR (100 MHz, CDCl<sub>3</sub>) δ 197.3, 168.8, 165.8, 153.3, 147.3, 137.5, 133.9, 127.5, 127.2, 126.8, 125.1, 124.6, 124.3, 124.2, 123.5, 121.6, 117.6, 114.7, 69.2, 38.7, 30.5, 24.3; HRMS-TOF: [M + Na]<sup>+</sup> calcd for C<sub>23</sub>H<sub>17</sub>NNaO<sub>4</sub><sup>+</sup>: 394.1050; found: 394.1061.

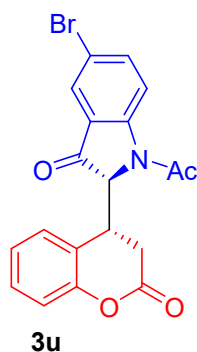

**1-acetyl-5-bromo-2-(2-oxochroman-4-yl)indolin-3-one 3u:** yellow solid, 95%, <sup>1</sup>H NMR (400 MHz, CDCl<sub>3</sub>) δ 7.85 (s, 1H), 7.72 (d, *J* = 11.2 Hz, 2H), 7.28 (d, *J* = 6.1 Hz, 1H), 7.19 (d, *J* = 7.0 Hz, 1H), 7.06 (t, *J* = 7.2 Hz, 1H), 7.01 (d, *J* = 8.0 Hz, 1H), 4.71 (s, 1H), 3.92 (d, *J* = 5.5 Hz, 1H), 2.90 (dd, *J* = 16.9, 7.7 Hz, 1H), 2.79 (d, *J* = 17.0 Hz, 1H), 2.19 (s, 3H); <sup>13</sup>C NMR (100 MHz, CDCl<sub>3</sub>) δ 195.8, 168.6, 165.6, 152.2, 151.9, 140.1, 130.1, 128.6, 126.6, 124.7, 119.9, 117.8, 117.6, 69.6, 38.7, 30.3, 24.0; HRMS-TOF: [M + Na]<sup>+</sup> calcd for C<sub>19</sub>H<sub>14</sub>BrNNaO<sub>4</sub><sup>+</sup>: 421.9998; found: 421.9985.

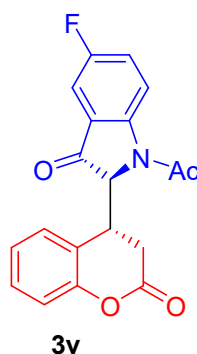

**1-acetyl-5-fluoro-2-(2-oxochroman-4-yl)indolin-3-one 3v:** yellow solid, 92%, <sup>1</sup>H NMR (400 MHz, CDCl<sub>3</sub>) δ 7.97 (s, 1H), 7.34 (td, *J* = 8.7, 2.8 Hz, 1H), 7.24 (dt, *J* = 5.0, 2.2 Hz, 2H), 7.18 (d, *J* = 7.3 Hz, 1H), 7.03 (t, *J* = 7.5 Hz, 1H), 6.98 (d, *J* = 8.2 Hz, 1H), 4.71 (s, 1H), 3.90 (d, *J* = 6.9 Hz, 1H), 2.86 (dt, *J* = 38.2, 12.4 Hz, 2H), 2.16 (s, 3H); <sup>13</sup>C NMR (100 MHz, CDCl<sub>3</sub>) δ 196.4 (d, *J* = 2.9 Hz), 168.5, 165.6, 160.5, 158.0, 151.9, 149.8, 130.0, 128.7, 126.3, 124.9 (d, *J* = 24.0 Hz), 124.7, 119.8,

117.6, 109.5 (d,  $J = 24.0$  Hz), 69.9, 38.7, 30.3, 23.8; HRMS-TOF:  $[M + Na]^+$  calcd for  $C_{19}H_{14}FNNaO_4^+$ : 362.0799; found: 362.0793.

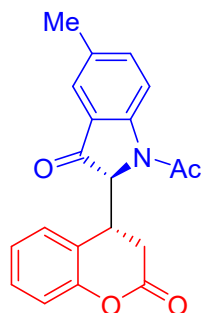

**3w**

**1-acetyl-5-methyl-2-(2-oxochroman-4-yl)indolin-3-one 3w**: yellow solid, 82%,  $^1H$  NMR (400 MHz,  $CDCl_3$ )  $\delta$  7.63 (s, 1H), 7.44 (d,  $J = 7.9$  Hz, 2H), 7.25 – 7.18 (m, 2H), 7.03 (t,  $J = 7.5$  Hz, 1H), 6.97 (d,  $J = 8.2$  Hz, 1H), 4.69 (s, 1H), 3.92 (d,  $J = 7.2$  Hz, 1H), 2.88 – 2.74 (m, 2H), 2.33 (s, 3H), 2.22 (s, 3H);  $^{13}C$  NMR (100 MHz,  $CDCl_3$ )  $\delta$  197.2, 168.7, 166.0, 151.9, 138.6, 134.5, 129.6, 128.7, 125.3, 124.5, 123.8, 120.4, 117.4, 69.4, 38.3, 30.3, 24.2, 20.6; HRMS-TOF:  $[M + Na]^+$  calcd for  $C_{20}H_{17}NNaO_4^+$ : 358.1050; found: 358.1046.

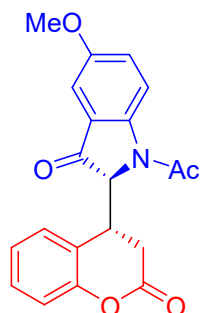

**3x**

**1-acetyl-5-methoxy-2-(2-oxochroman-4-yl)indolin-3-one 3x**: yellow solid, 80%,  $^1H$  NMR (400 MHz,  $CDCl_3$ )  $\delta$  7.78 (s, 1H), 7.20 (dt,  $J = 11.4, 8.4$  Hz, 3H), 7.05 – 6.98 (m, 2H), 6.95 (d,  $J = 8.1$  Hz, 1H), 4.69 (s, 1H), 3.92 (d,  $J = 5.3$  Hz, 1H), 3.77 (s, 3H), 2.91 – 2.76 (m, 2H), 2.21 (s, 3H);  $^{13}C$  NMR (100 MHz,  $CDCl_3$ )  $\delta$  197.1, 168.4, 165.9, 156.7, 151.9, 129.7, 128.7, 126.3, 126.0, 124.5, 120.1, 117.4, 104.8, 69.7, 55.8, 38.3, 30.3, 24.0; HRMS-TOF:  $[M + Na]^+$  calcd for  $C_{20}H_{17}NNaO_5^+$ : 374.0999; found: 374.0993.

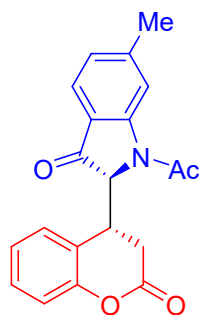

**3y**

**1-acetyl-6-methyl-2-(2-oxochroman-4-yl)indolin-3-one 3y:** yellow solid, 91%,  $^1\text{H}$  NMR (400 MHz,  $\text{CDCl}_3$ )  $\delta$  7.67 (s, 1H), 7.50 (d,  $J = 7.9$  Hz, 1H), 7.21 (dd,  $J = 16.9, 8.1$  Hz, 2H), 7.02 (t,  $J = 7.4$  Hz, 1H), 6.96 (dd,  $J = 7.9, 1.6$  Hz, 2H), 4.67 (s, 1H), 3.91 (d,  $J = 7.3$  Hz, 1H), 2.91 – 2.75 (m, 2H), 2.45 (s, 3H), 2.22 (s, 3H);  $^{13}\text{C}$  NMR (100 MHz,  $\text{CDCl}_3$ )  $\delta$  196.4, 168.8, 165.9, 153.7, 152.0, 149.6, 129.7, 128.6, 125.9, 124.5, 123.8, 122.9, 120.5, 117.4, 69.6, 38.4, 30.3, 24.3, 22.9; HRMS-TOF:  $[\text{M} + \text{Na}]^+$  calcd for  $\text{C}_{20}\text{H}_{17}\text{NNaO}_4^+$ : 358.1050; found: 358.1052.

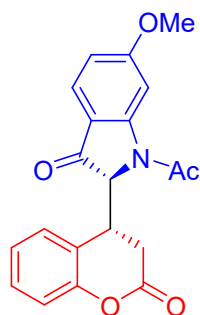

**3z**

**1-acetyl-6-methoxy-2-(2-oxochroman-4-yl)indolin-3-one 3z:** yellow solid, 88%,  $^1\text{H}$  NMR (400 MHz,  $\text{CDCl}_3$ )  $\delta$  7.55 (d,  $J = 8.6$  Hz, 1H), 7.46 (d,  $J = 7.1$  Hz, 1H), 7.27 – 7.18 (m, 2H), 7.05 (t,  $J = 7.2$  Hz, 1H), 6.98 (d,  $J = 8.1$  Hz, 1H), 6.69 (dd,  $J = 8.6, 2.1$  Hz, 1H), 4.63 (s, 1H), 3.89 (d,  $J = 6.7$  Hz, 4H), 2.81 (qd,  $J = 16.9, 4.6$  Hz, 2H), 2.10 (s, 3H);  $^{13}\text{C}$  NMR (100 MHz,  $\text{CDCl}_3$ )  $\delta$  194.6, 169.0, 167.5, 165.9, 155.8, 152.0, 129.8, 128.6, 125.5, 124.7, 120.6, 118.2, 117.5, 112.6, 102.3, 70.0, 56.1, 38.8, 30.1, 24.0; HRMS-TOF:  $[\text{M} + \text{Na}]^+$  calcd for  $\text{C}_{20}\text{H}_{17}\text{NNaO}_5^+$ : 374.0999; found: 374.0997.

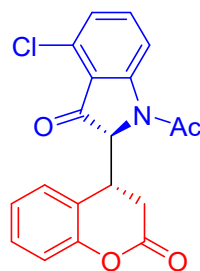

**3aa**

**1-acetyl-4-chloro-2-(2-oxochroman-4-yl)indolin-3-one 3aa:** yellow solid, 68%,  $^1\text{H}$  NMR (400 MHz,  $\text{CDCl}_3$ )  $\delta$  7.82 (s, 1H), 7.63 (ddd,  $J = 7.3, 4.1, 2.8$  Hz, 2H), 7.20 – 7.15 (m, 2H), 7.02 (d,  $J = 7.5$  Hz, 1H), 6.96 (d,  $J = 8.2$  Hz, 1H), 4.70 (s, 1H), 3.93 (d,  $J = 7.0$  Hz, 1H), 2.93 – 2.80 (m, 2H), 2.26 (s, 3H);  $^{13}\text{C}$  NMR (100 MHz,  $\text{CDCl}_3$ )  $\delta$  197.1, 168.7, 165.9, 151.9, 137.5, 129.7, 128.6, 125.2, 124.54, 124.51, 124.2, 120.2, 117.4, 69.2, 38.4, 30.4, 24.3; HRMS-TOF:  $[\text{M} + \text{Na}]^+$  calcd for  $\text{C}_{19}\text{H}_{14}\text{ClNNaO}_4^+$ : 378.0504; found: 378.0500.

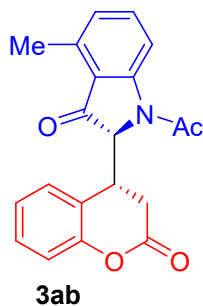

**1-acetyl-4-methyl-2-(2-oxochroman-4-yl)indolin-3-one 3ab:** white solid, 74%,  $^1\text{H}$  NMR (400 MHz,  $\text{CDCl}_3$ )  $\delta$  7.63 (s, 1H), 7.43 (t,  $J = 7.9$  Hz, 1H), 7.20 – 7.13 (m, 2H), 7.00 – 6.92 (m, 2H), 6.87 (d,  $J = 7.5$  Hz, 1H), 4.64 (d,  $J = 1.7$  Hz, 1H), 3.94 – 3.87 (m, 1H), 2.90 – 2.84 (m, 2H), 2.49 (s, 3H), 2.27 (s, 3H);  $^{13}\text{C}$  NMR (101 MHz,  $\text{CDCl}_3$ )  $\delta$  197.9, 168.7, 165.9, 153.6, 151.9, 140.0, 136.6, 129.6, 128.7, 126.2, 124.4, 122.9, 120.1, 117.2, 114.7, 69.1, 38.3, 30.5, 24.4, 18.3; HRMS-TOF:  $[\text{M} + \text{Na}]^+$  calcd for  $\text{C}_{20}\text{H}_{17}\text{NNaO}_4^+$ : 358.1050; found: 358.1055.

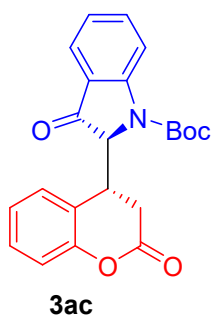

**tert-butyl 3-oxo-2-(2-oxochroman-4-yl)indoline-1-carboxylate 3ac:** yellow solid, 98% (dr 2:1),  $^1\text{H}$  NMR (400 MHz,  $\text{CDCl}_3$ )  $\delta$  7.96 (d,  $J = 7.0$  Hz, 1H), 7.60 (t,  $J = 6.3$  Hz, 2H), 7.20 (dd,  $J = 17.3, 8.1$  Hz, 2H), 7.09 (t,  $J = 7.4$  Hz, 1H), 7.03 (t,  $J = 7.4$  Hz, 1H), 6.97 (d,  $J = 8.1$  Hz, 1H), 4.55 (s, 1H), 3.93 (d,  $J = 7.0$  Hz, 1H), 2.84 (dd,  $J = 16.9, 7.7$  Hz, 1H), 2.76 (d,  $J = 16.8$  Hz, 1H), 1.47 (s, 9H);  $^{13}\text{C}$  NMR (100 MHz,  $\text{CDCl}_3$ )  $\delta$  197.6, 166.2, 153.9, 152.1, 151.1, 137.6, 129.3, 128.6, 124.4, 124.3, 123.74,

123.66, 121.1, 117.6, 117.3, 83.5, 69.0, 38.1, 30.3, 28.0; HRMS-TOF:  $[M + Na]^+$  calcd for  $C_{22}H_{21}NNaO_5^+$ : 402.1312; found: 402.1315.

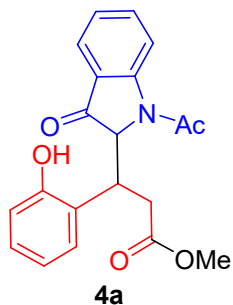

**methyl 3-(1-acetyl-3-oxoindolin-2-yl)-3-(2-hydroxyphenyl)propanoate 4a:** white solid, 99%,  
 $^1H$  NMR (400 MHz,  $CDCl_3$ )  $\delta$  8.33 (d,  $J = 86.1$  Hz, 2H), 7.50 (d,  $J = 7.1$  Hz, 1H), 7.37 (t,  $J = 7.3$  Hz, 1H), 6.99 (t,  $J = 7.1$  Hz, 1H), 6.82 (d,  $J = 6.4$  Hz, 2H), 6.75 (d,  $J = 7.6$  Hz, 1H), 6.49 (t,  $J = 6.9$  Hz, 1H), 4.88 – 4.73 (m, 2H), 3.79 (s, 4H), 2.74 (s, 4H);  $^{13}C$  NMR (100 MHz,  $CDCl_3$ )  $\delta$  198.8, 173.5, 171.2, 154.9, 153.2, 136.6, 128.4, 128.1, 125.6, 124.0, 122.8, 122.6, 119.5, 118.2, 115.1, 67.2, 52.0, 34.6, 32.5, 23.8; HRMS-TOF:  $[M + Na]^+$  calcd for  $C_{20}H_{19}NNaO_5^+$ : 376.1155; found: 376.1159.

### 3. The NMR of 3 and 4a

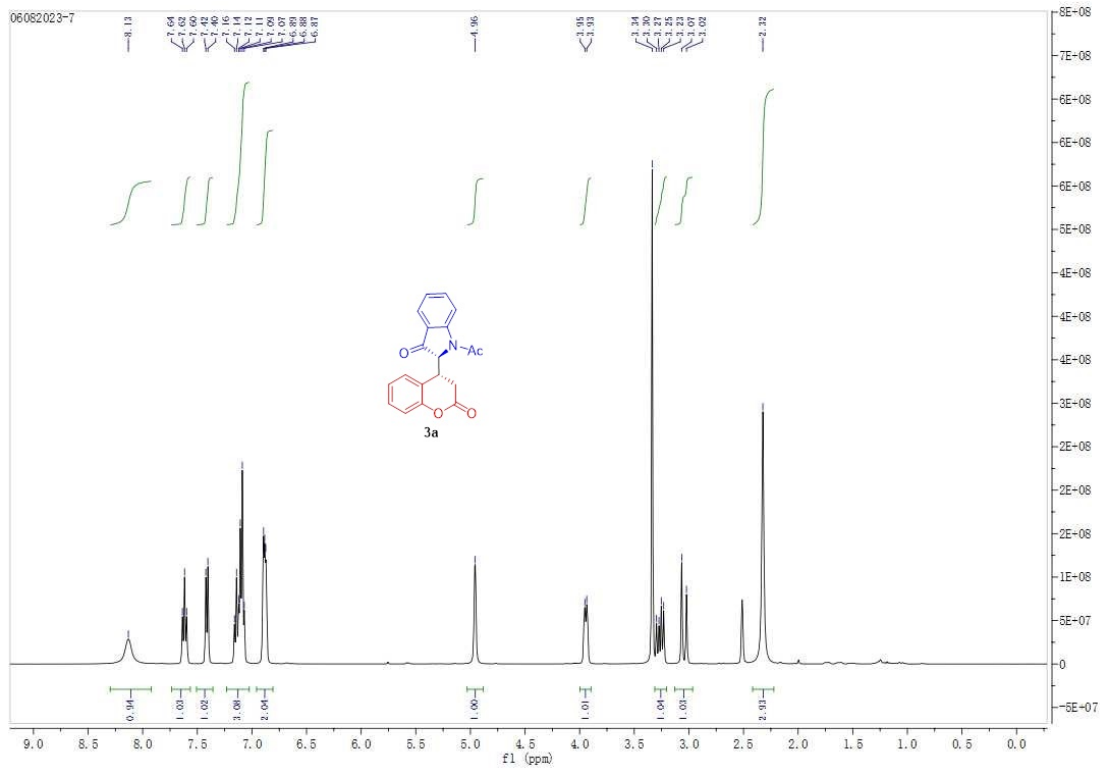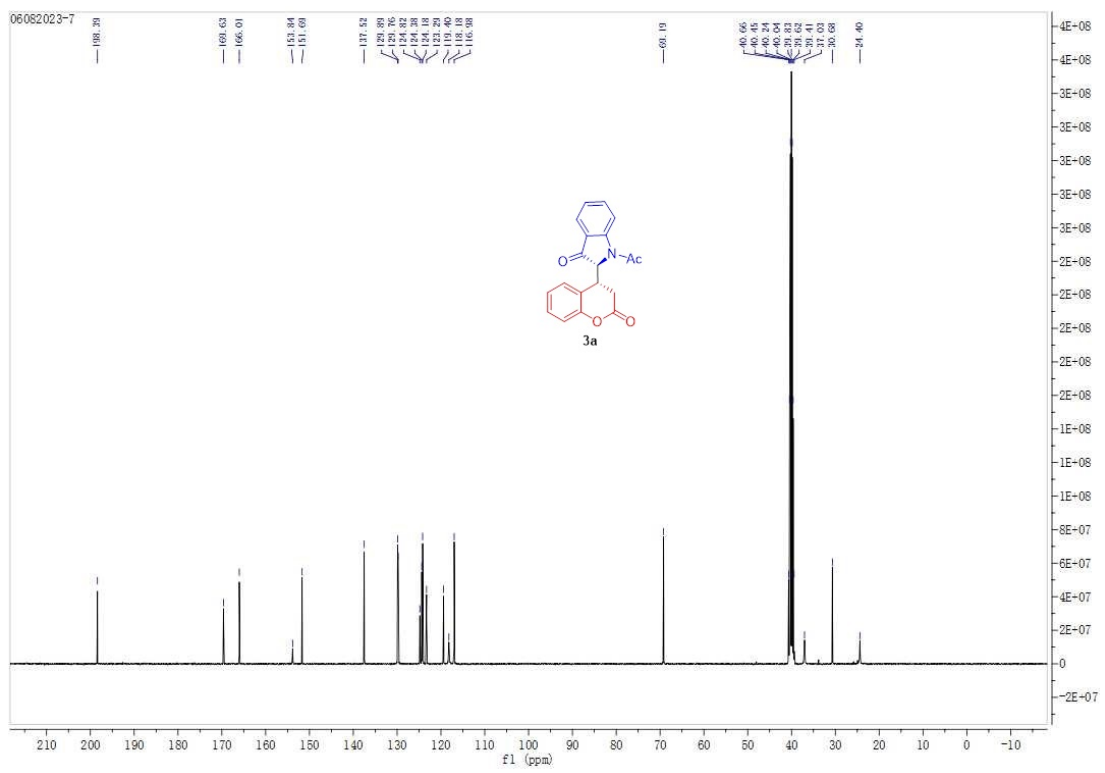

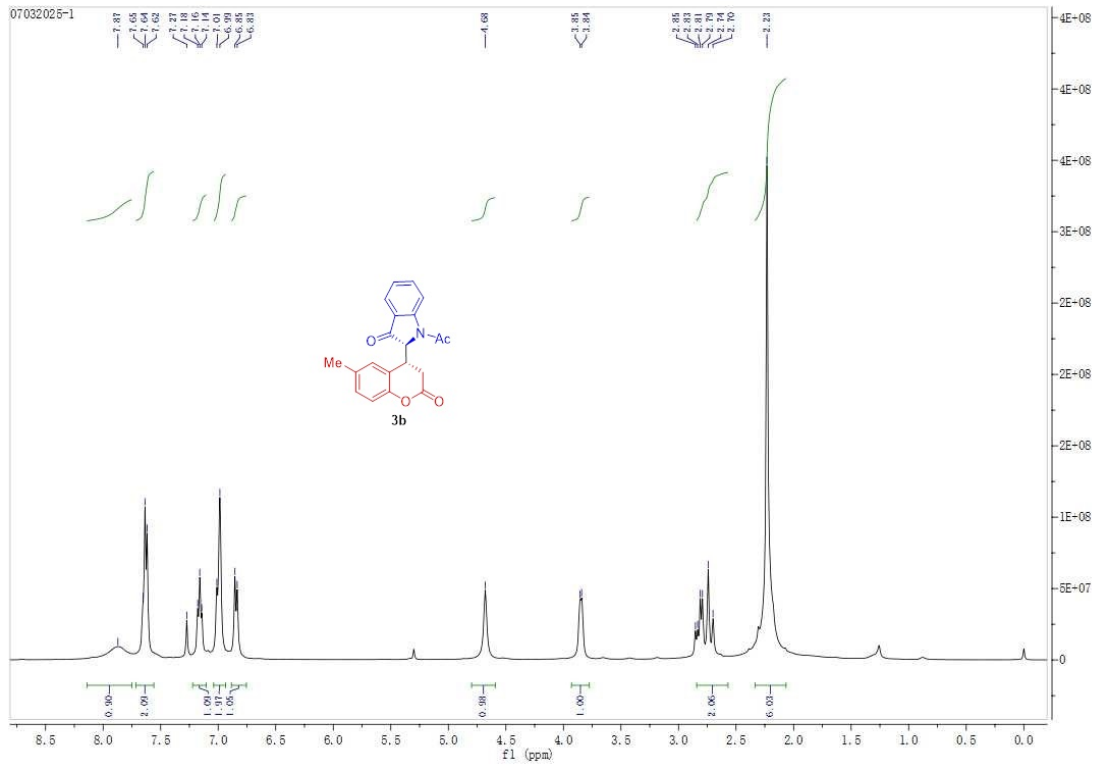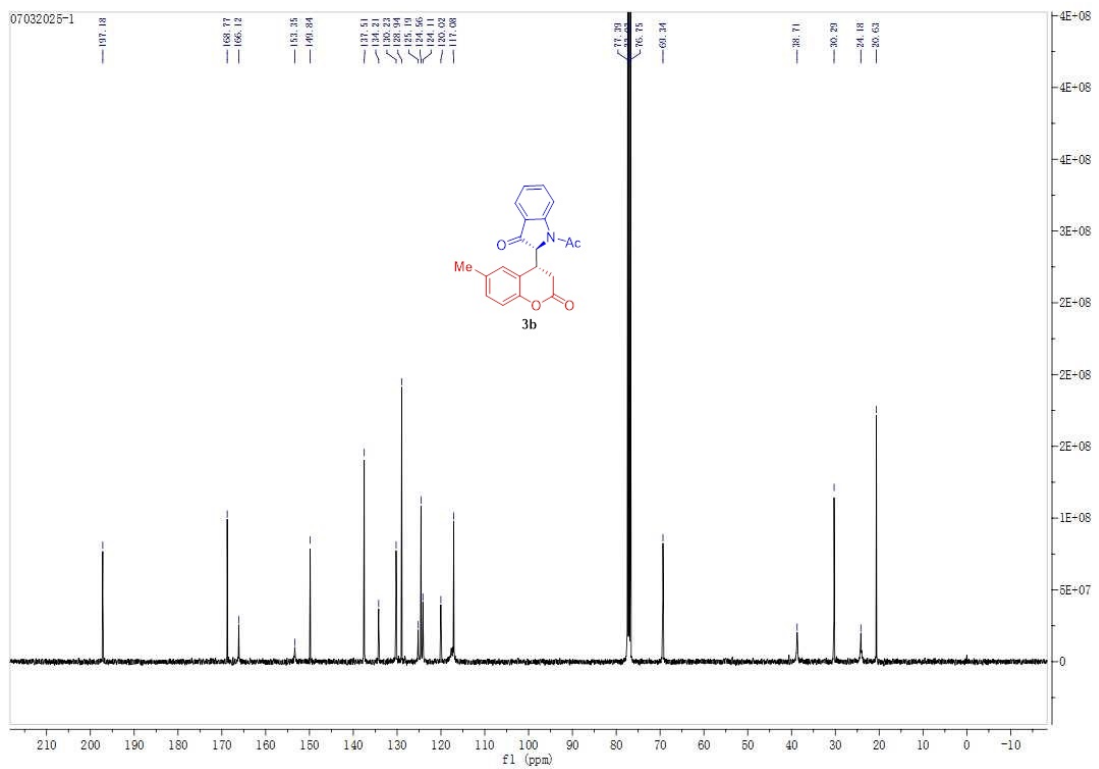

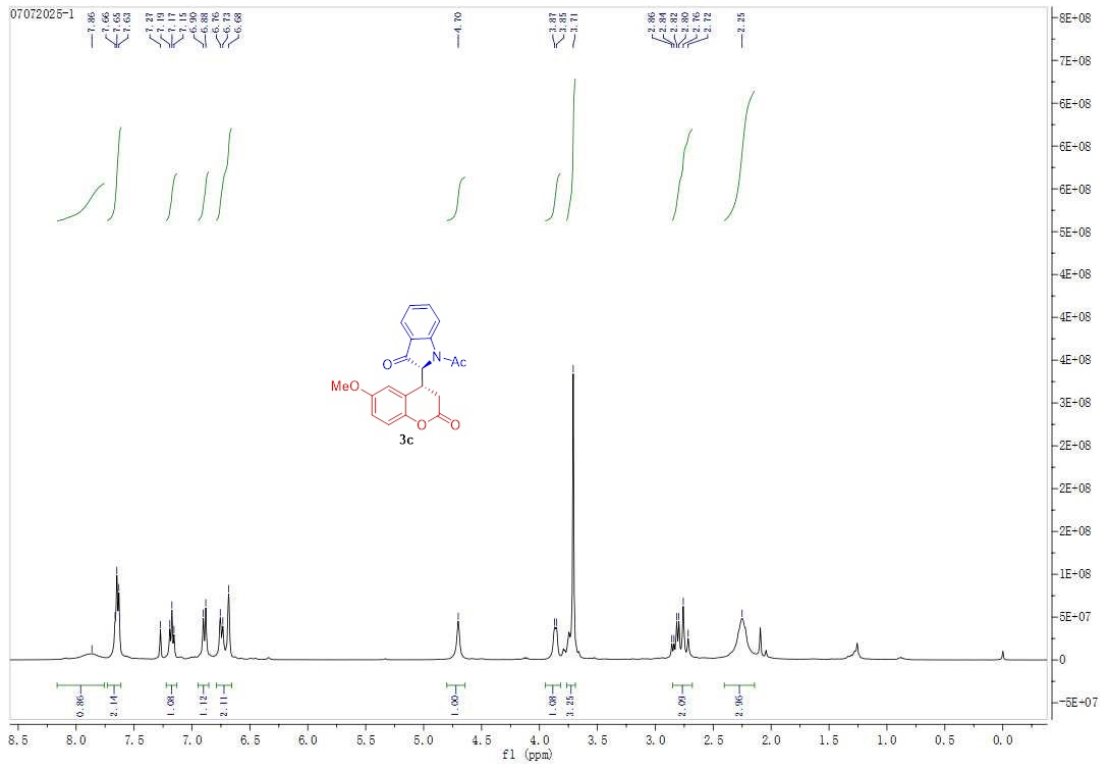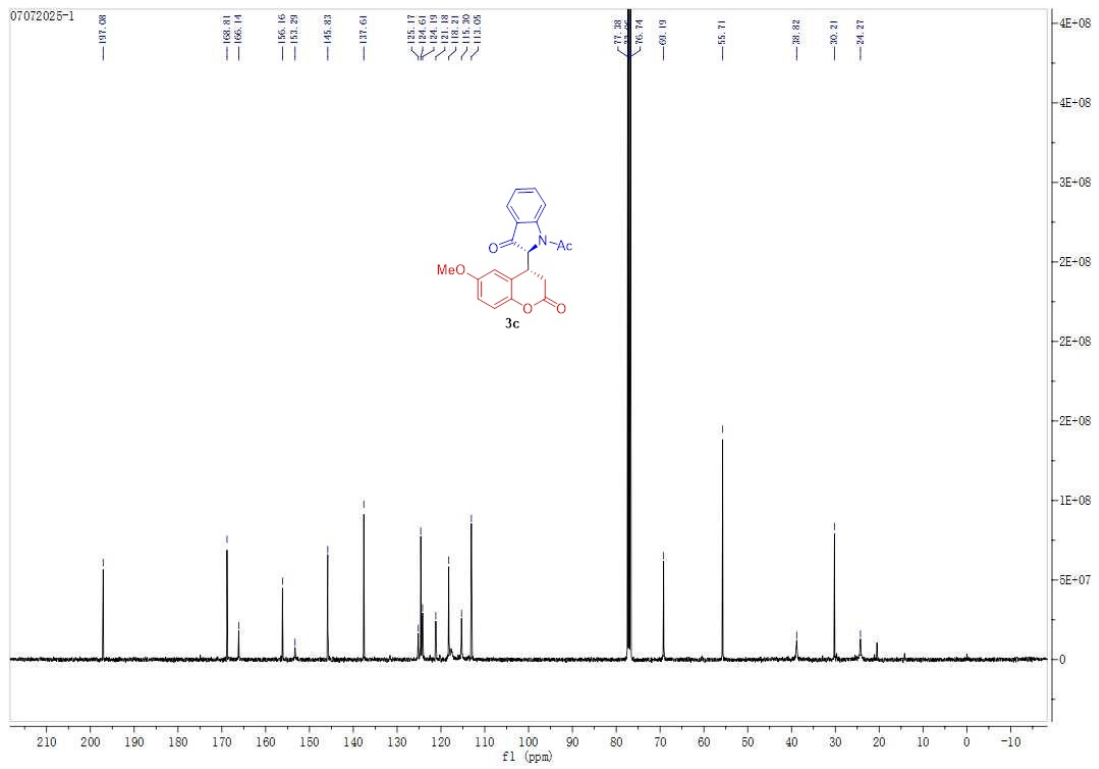

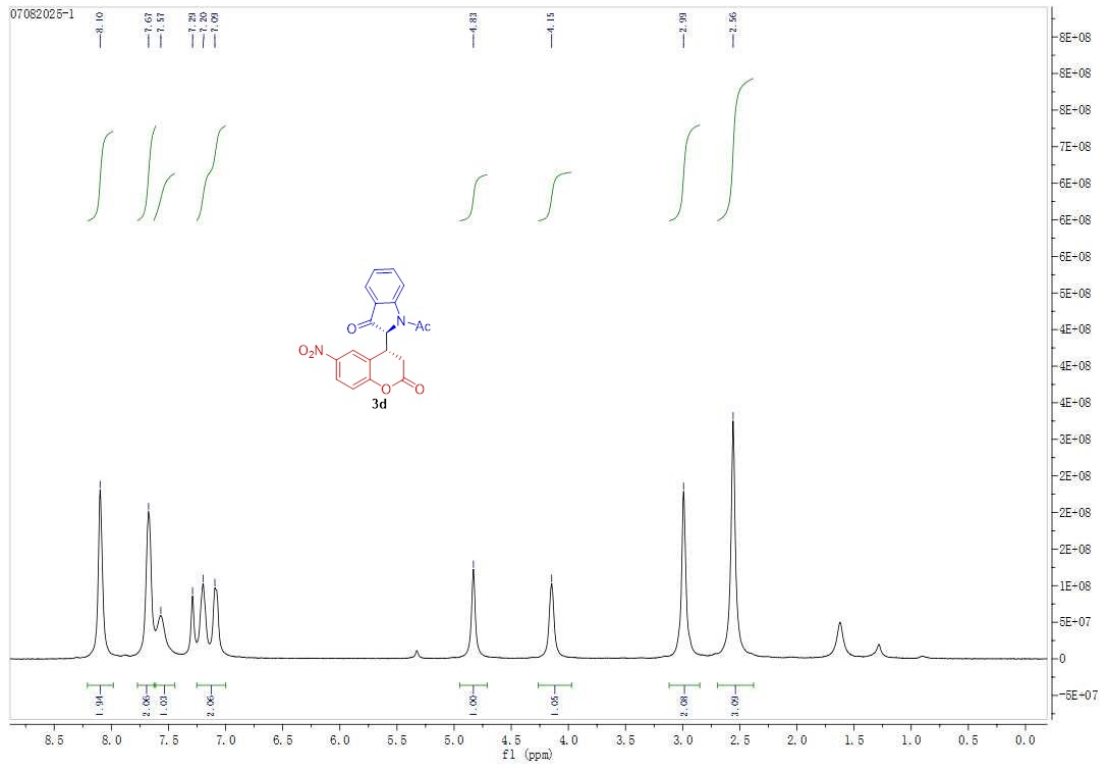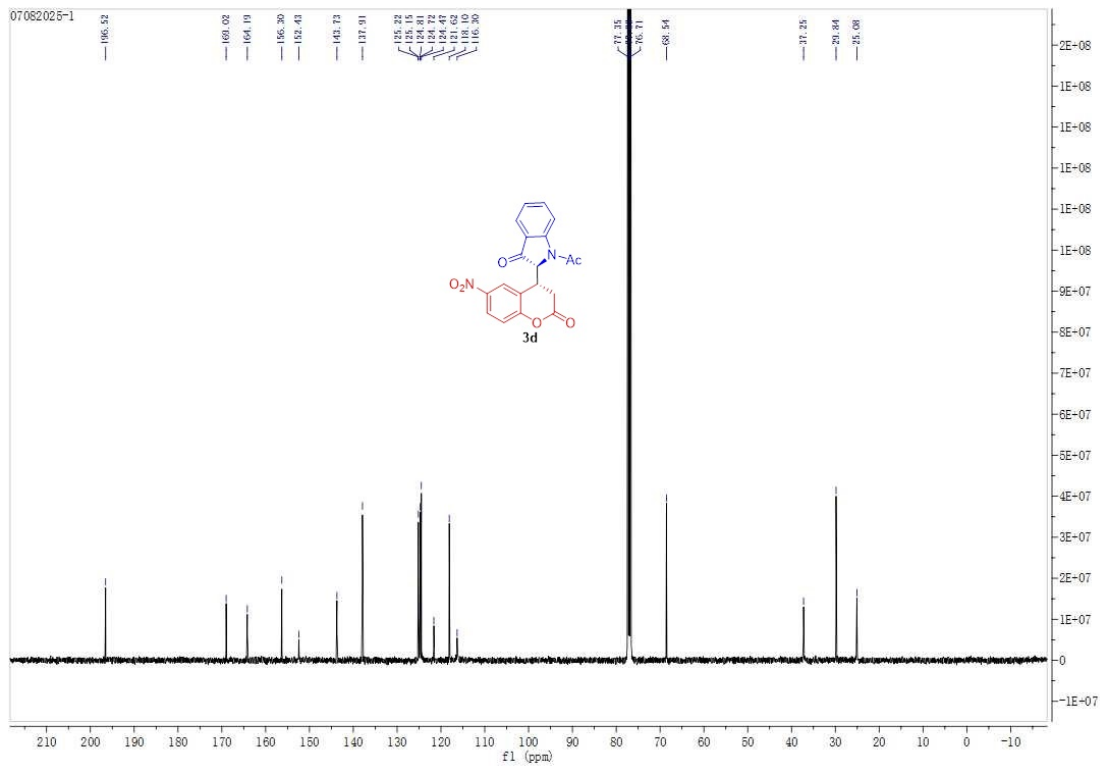

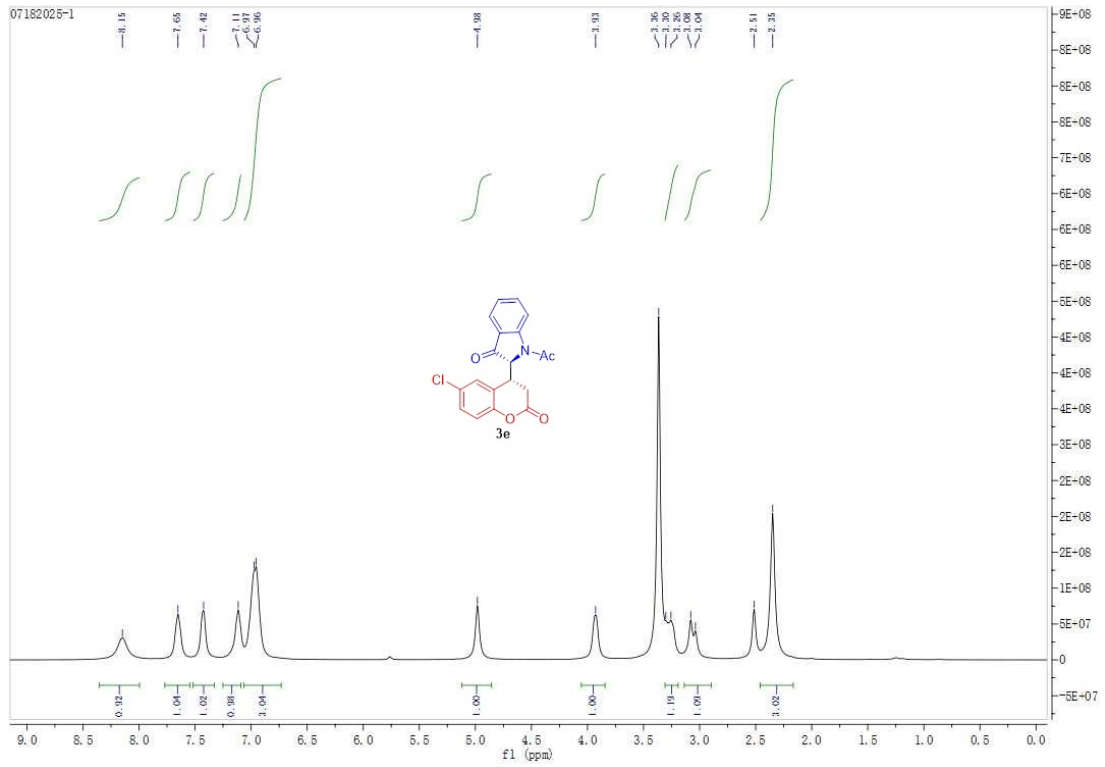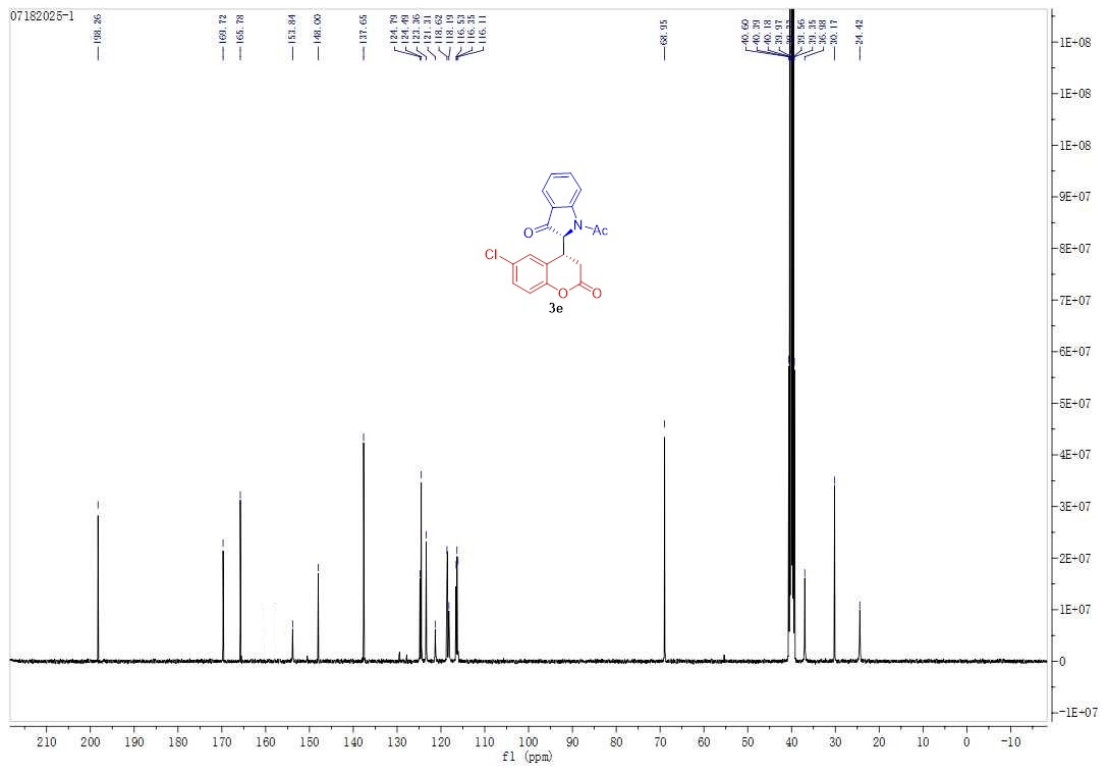



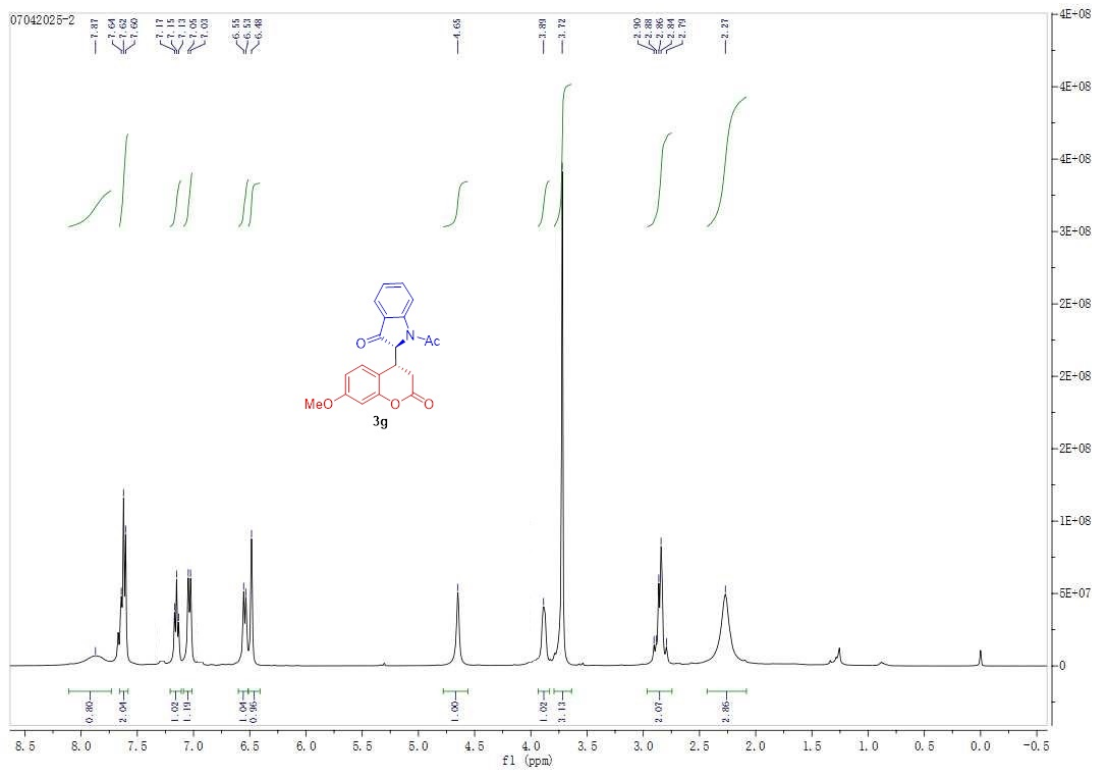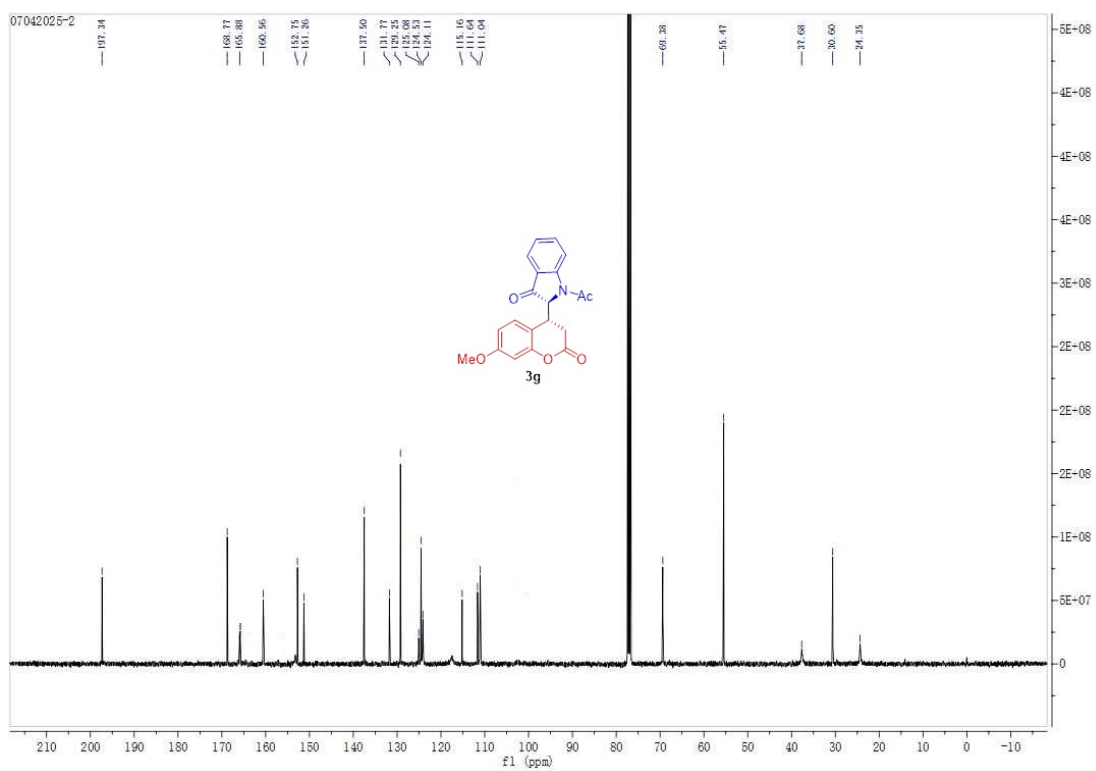

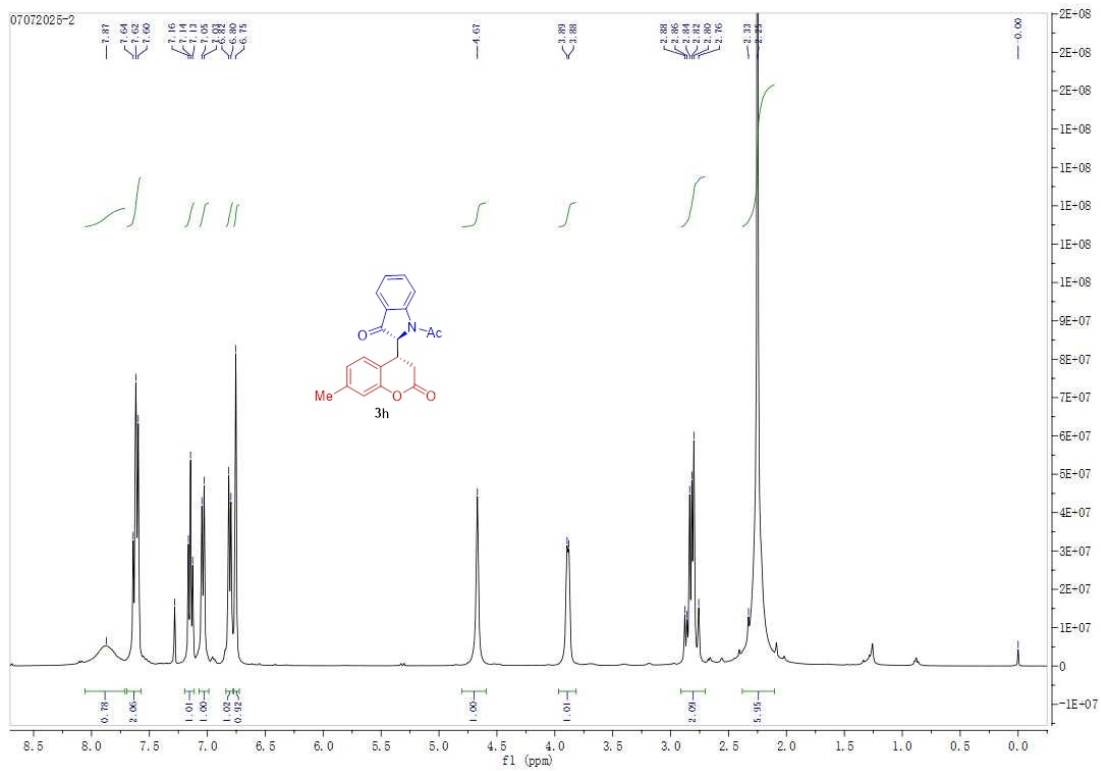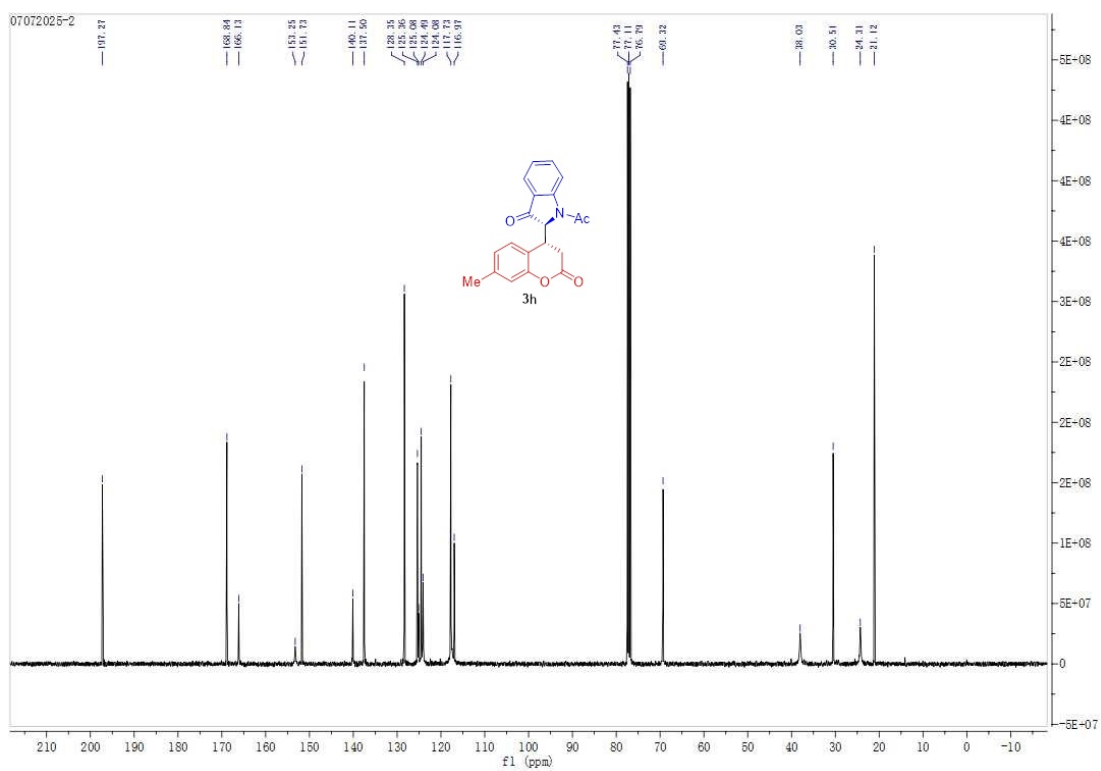

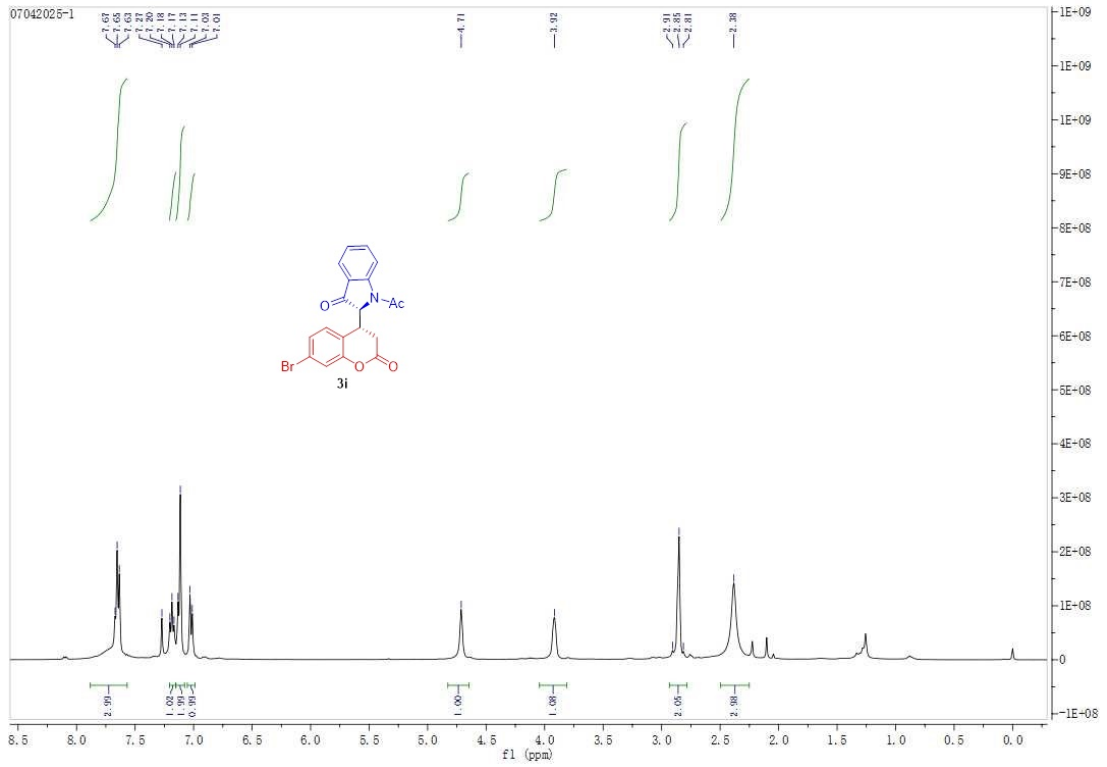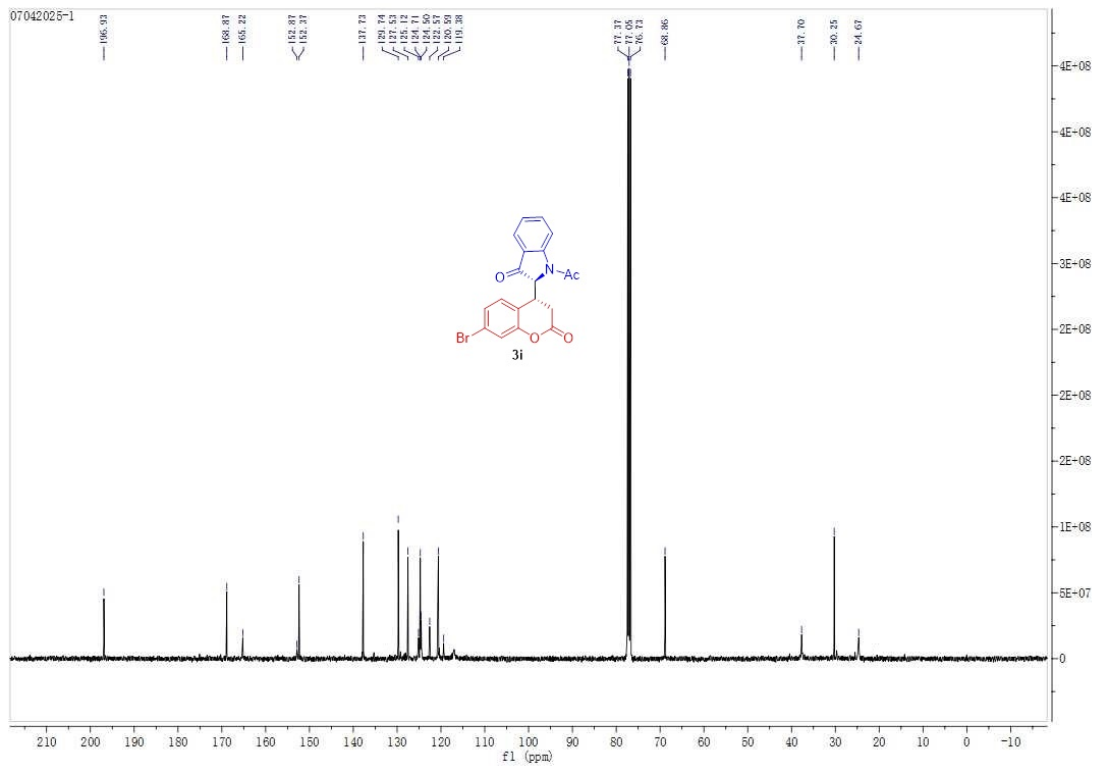

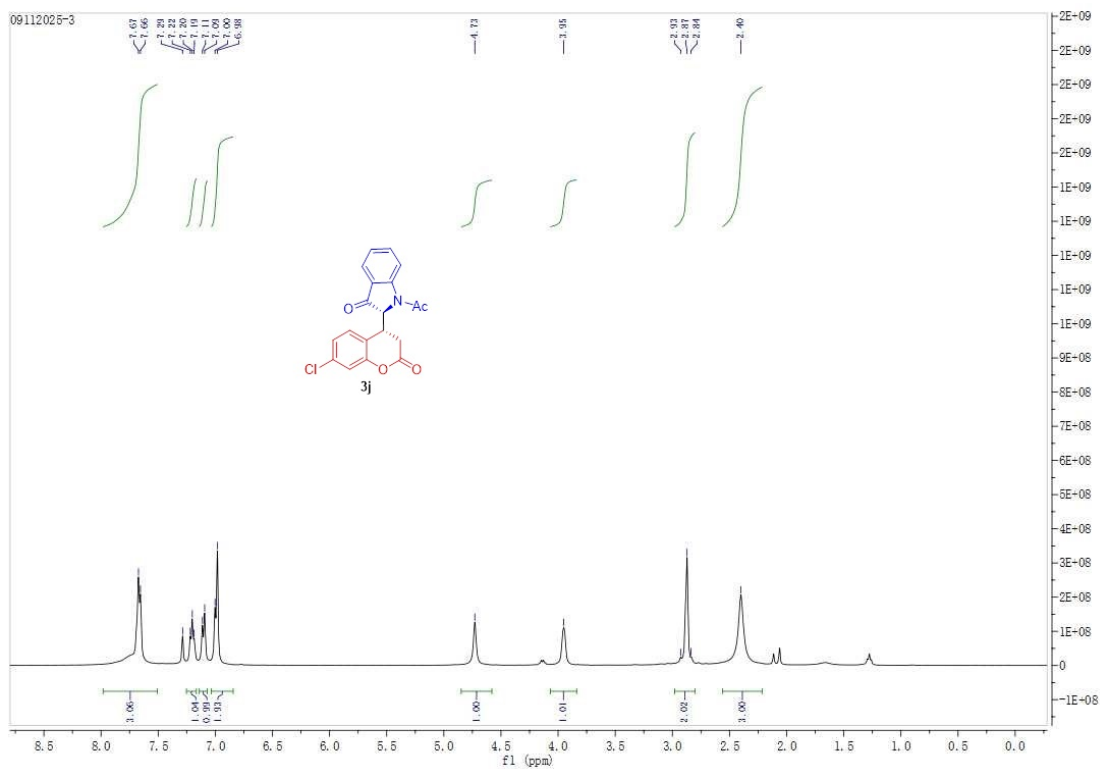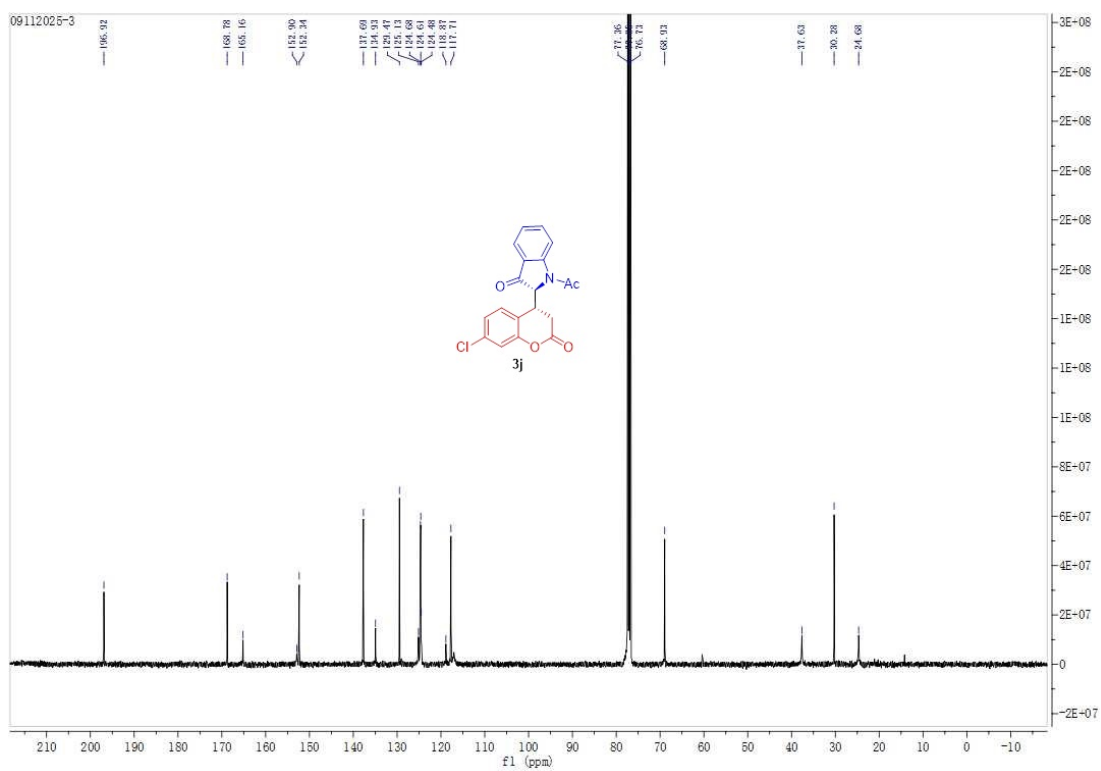

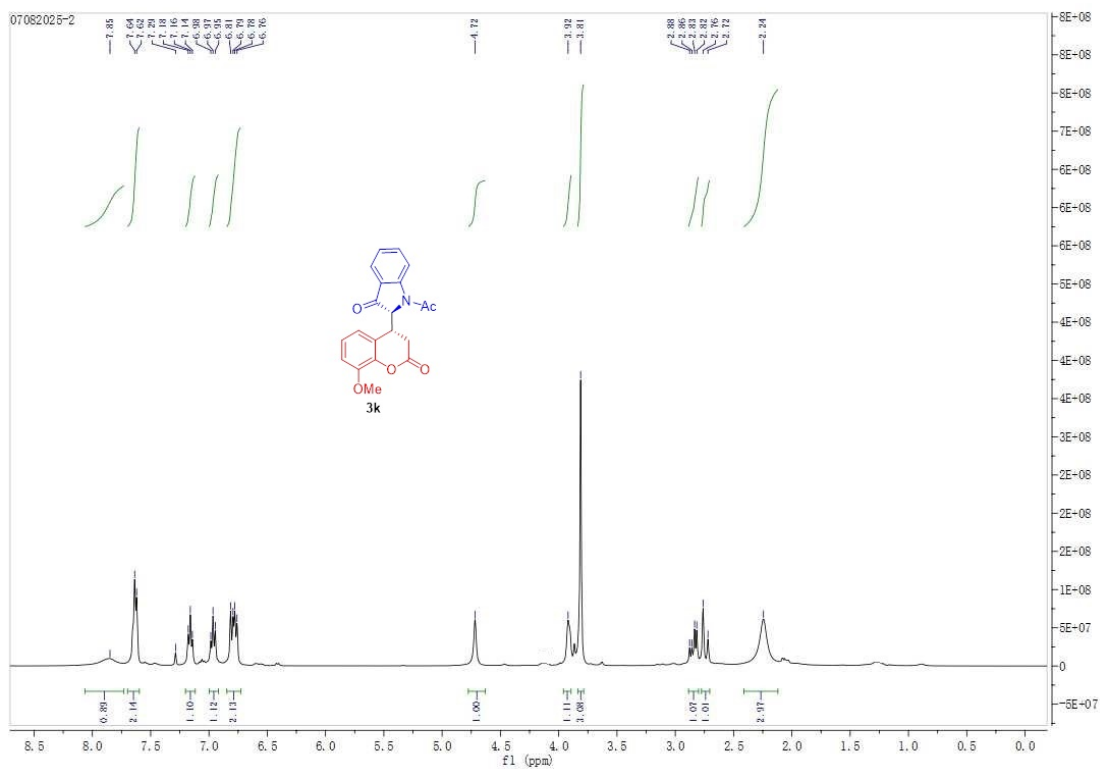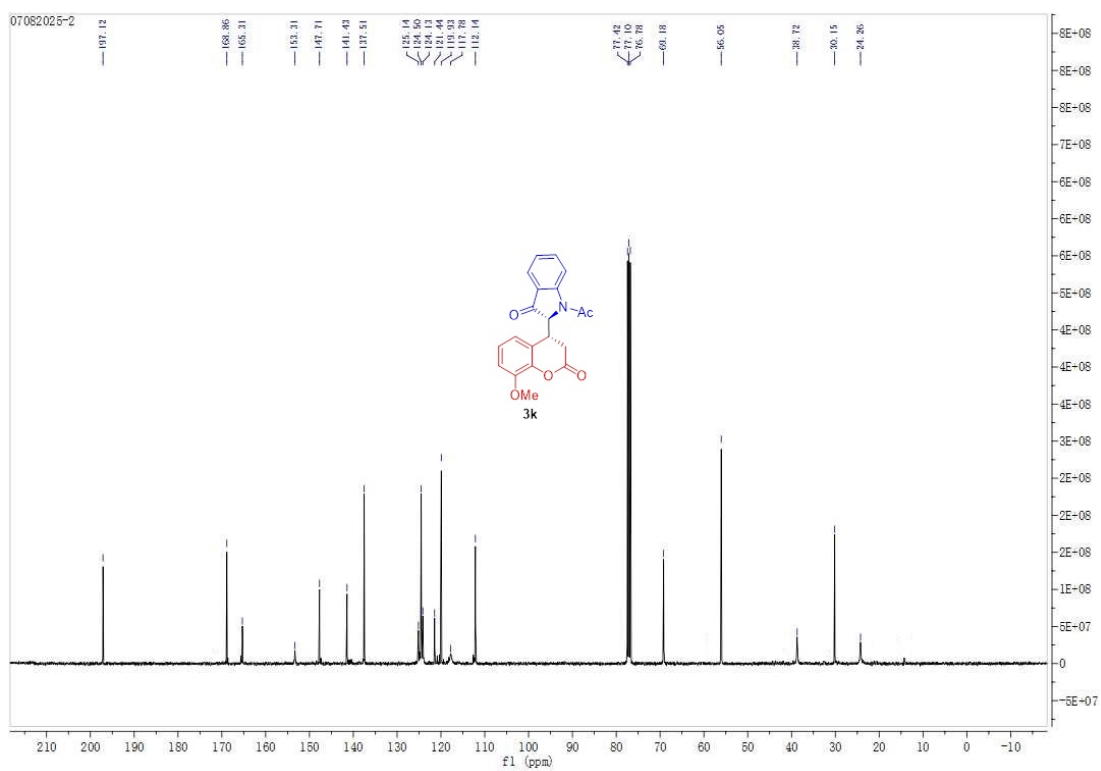

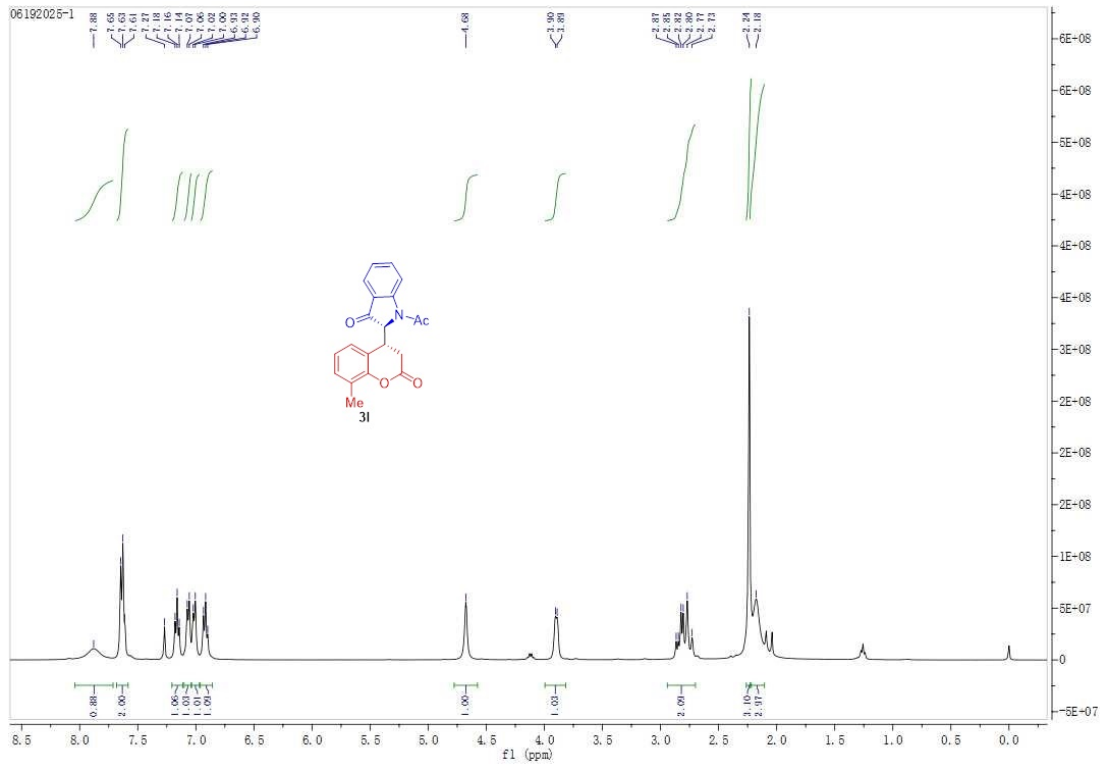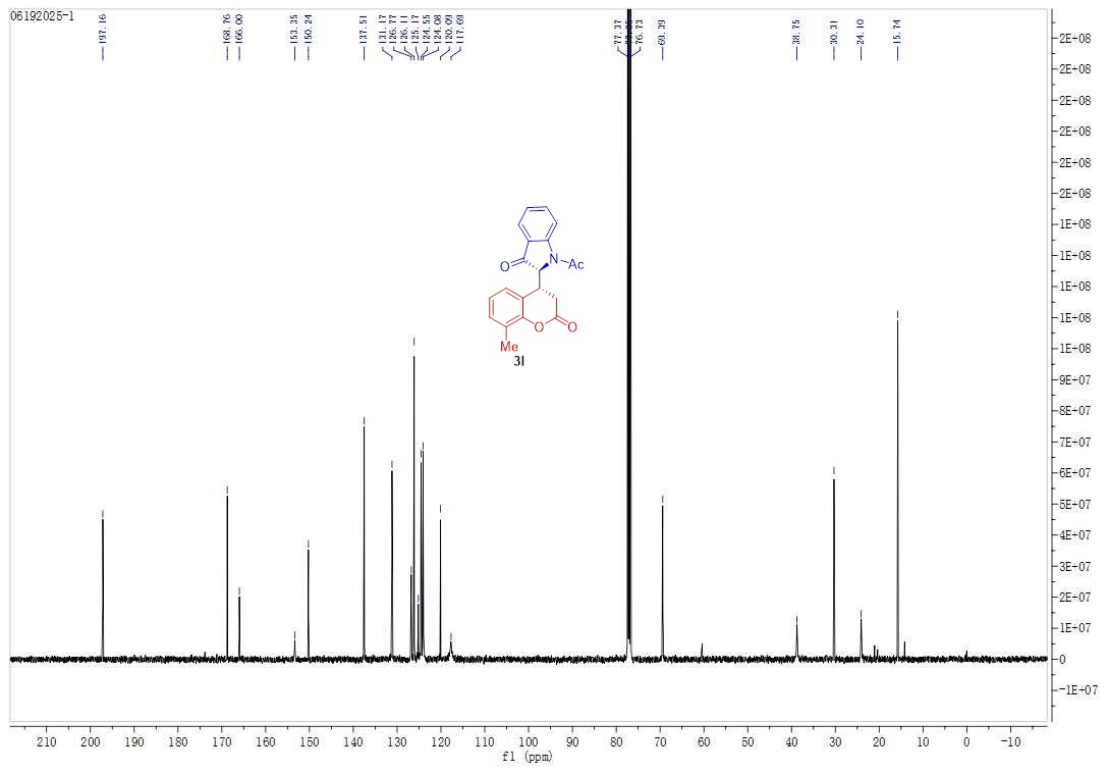

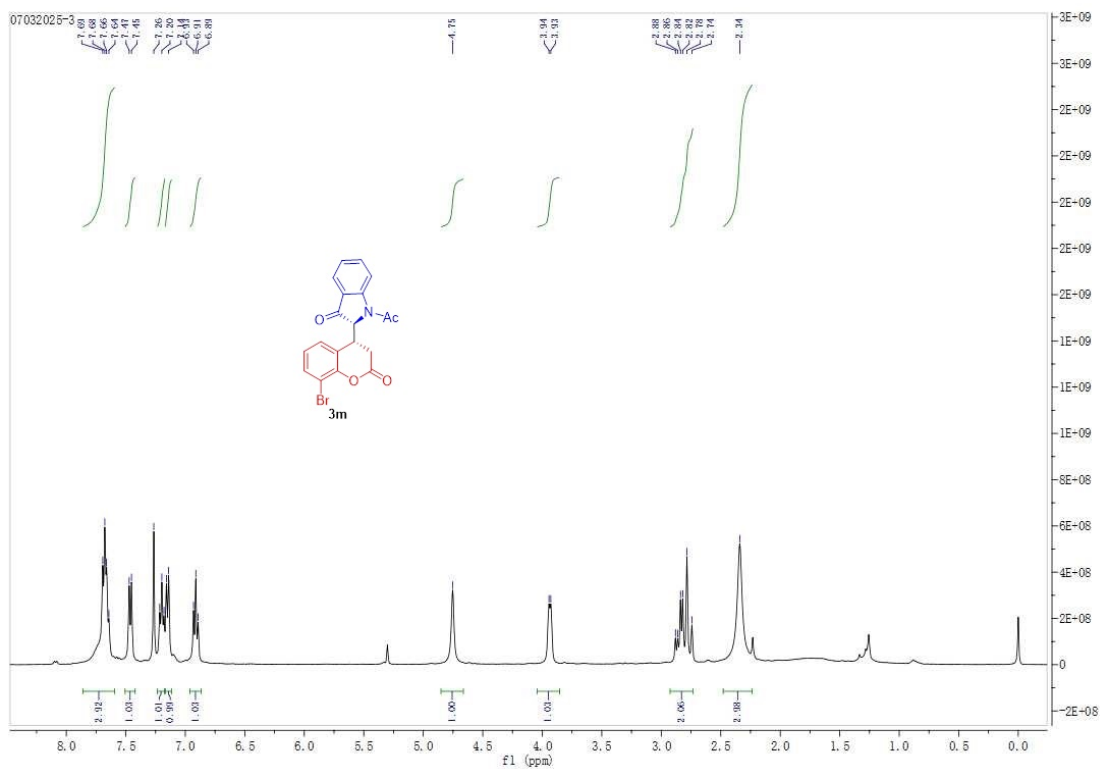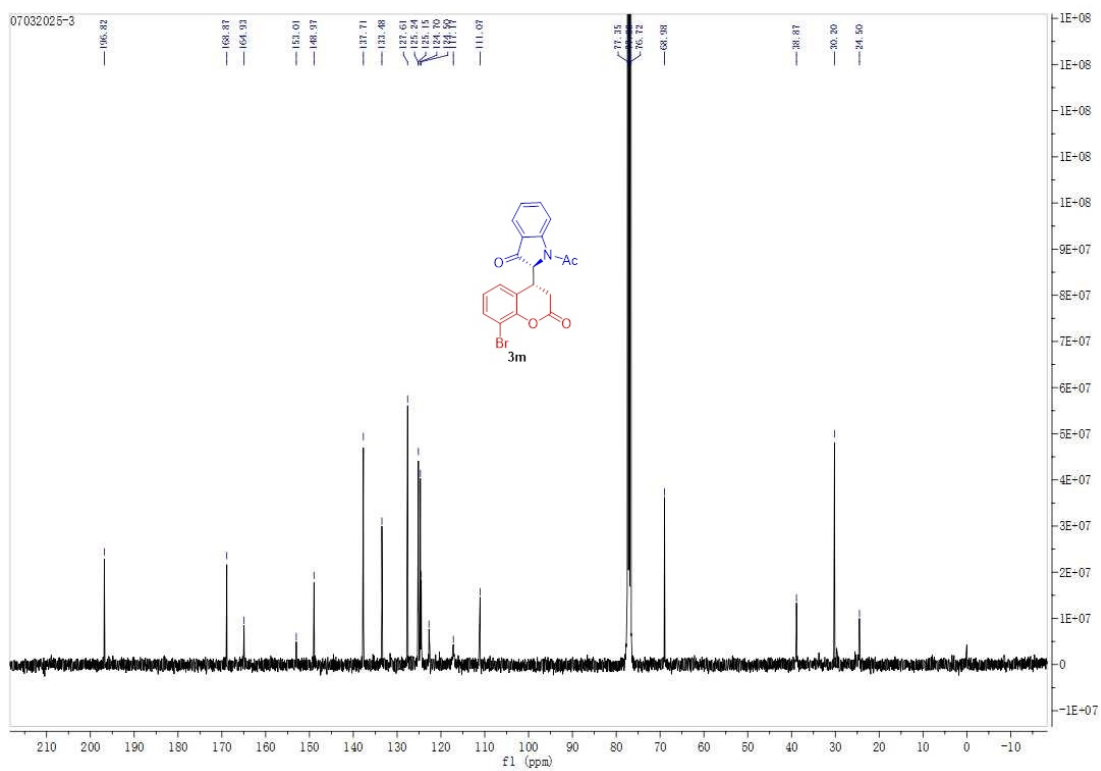

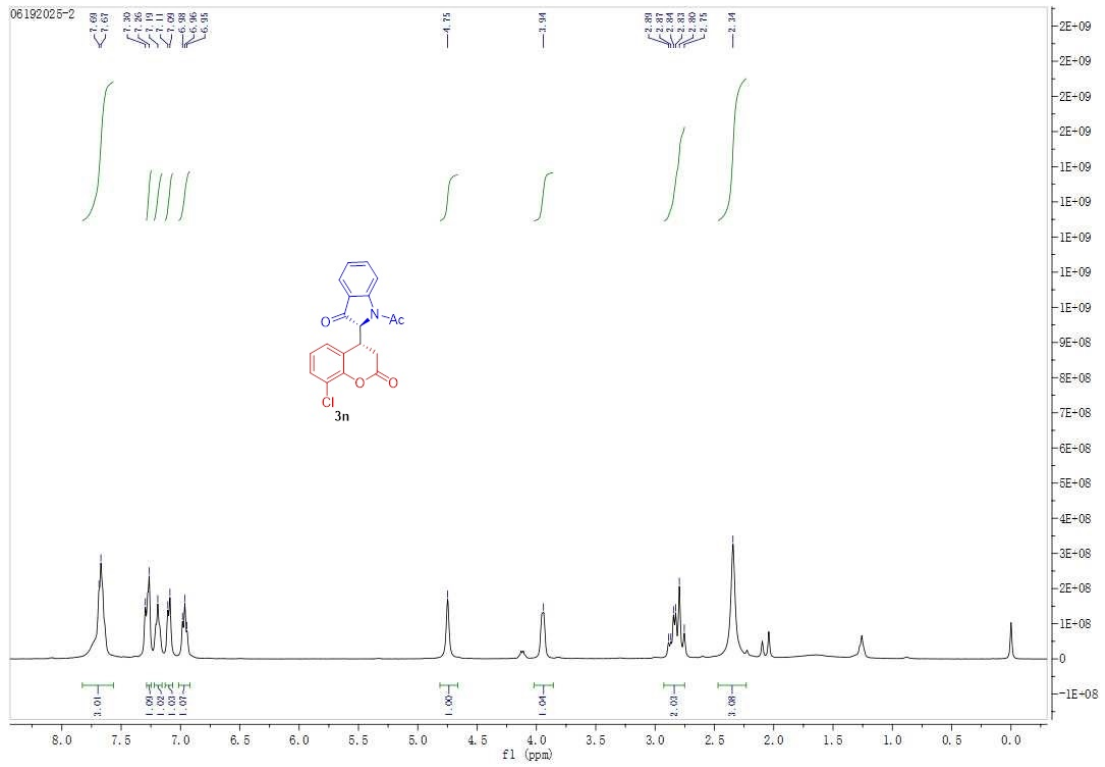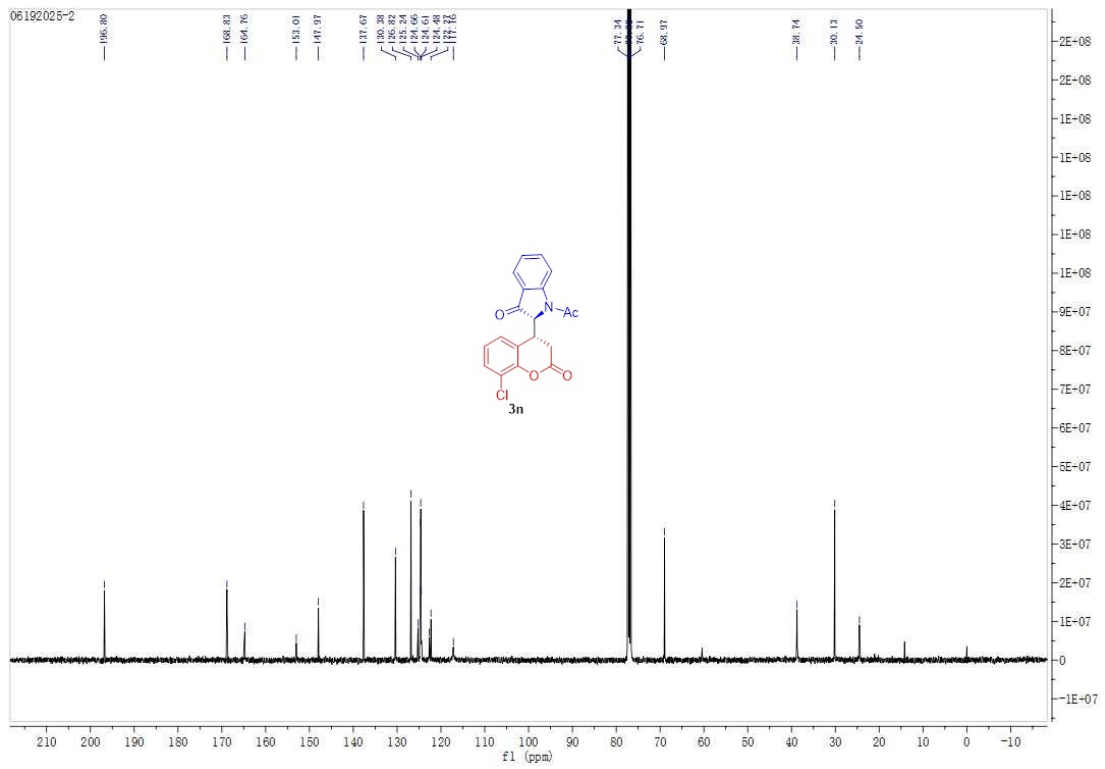

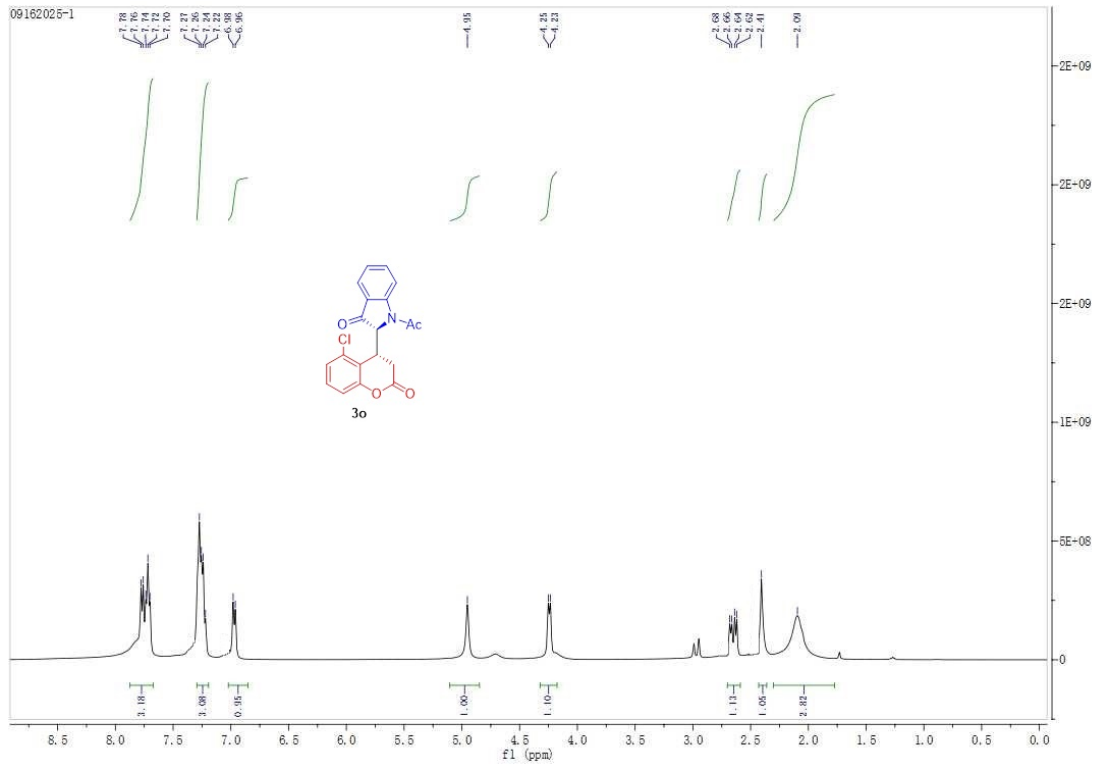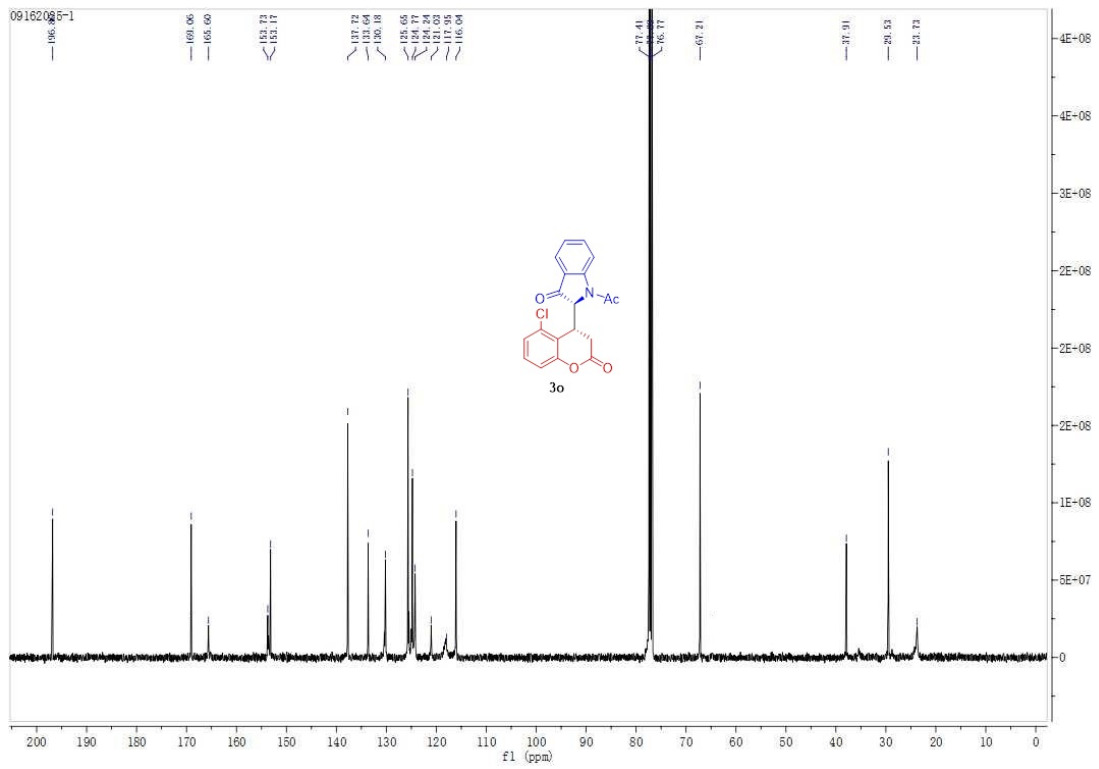

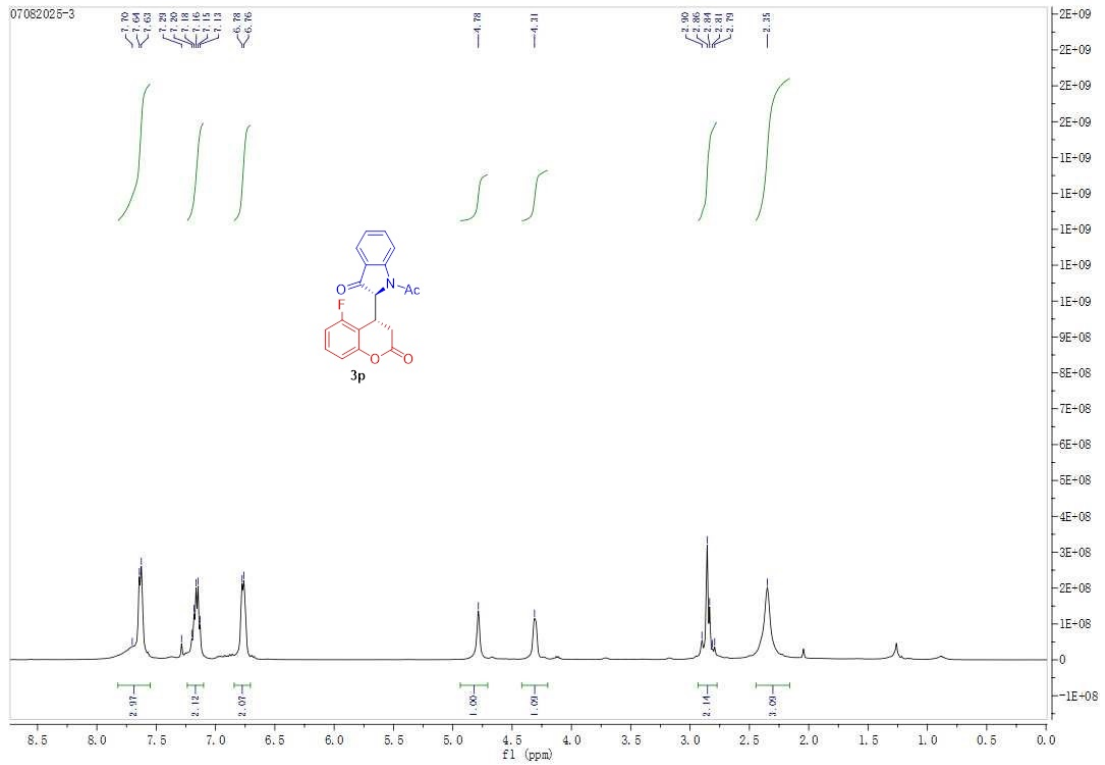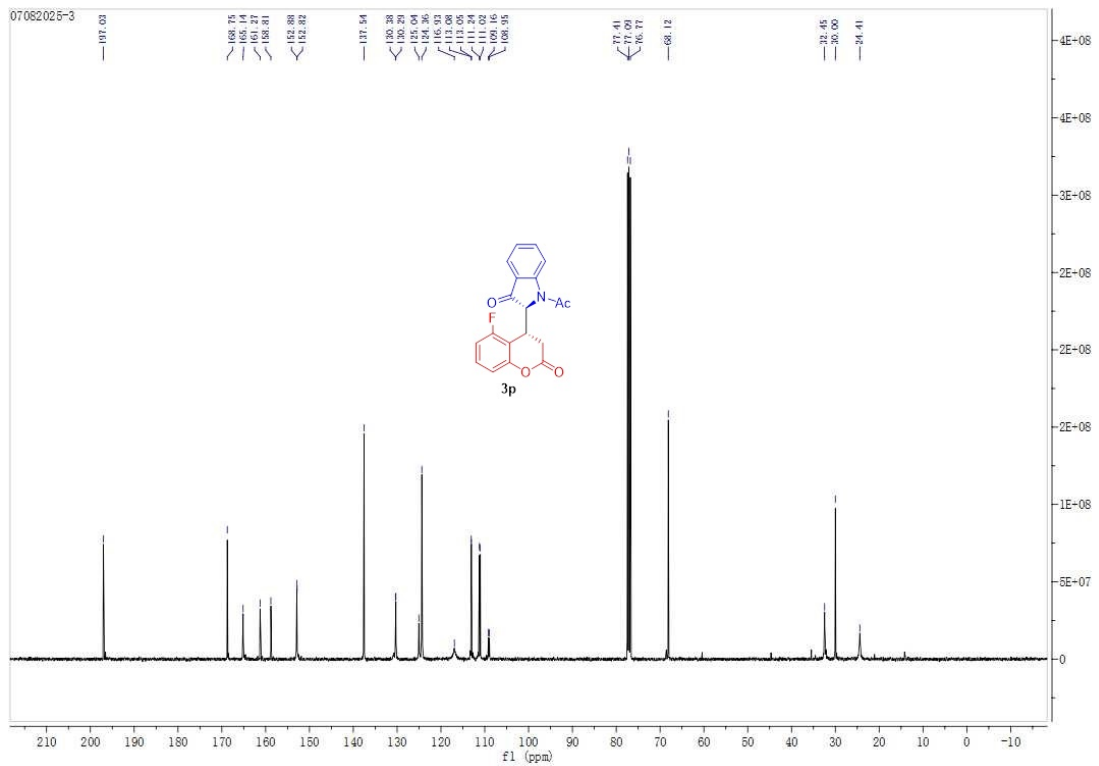

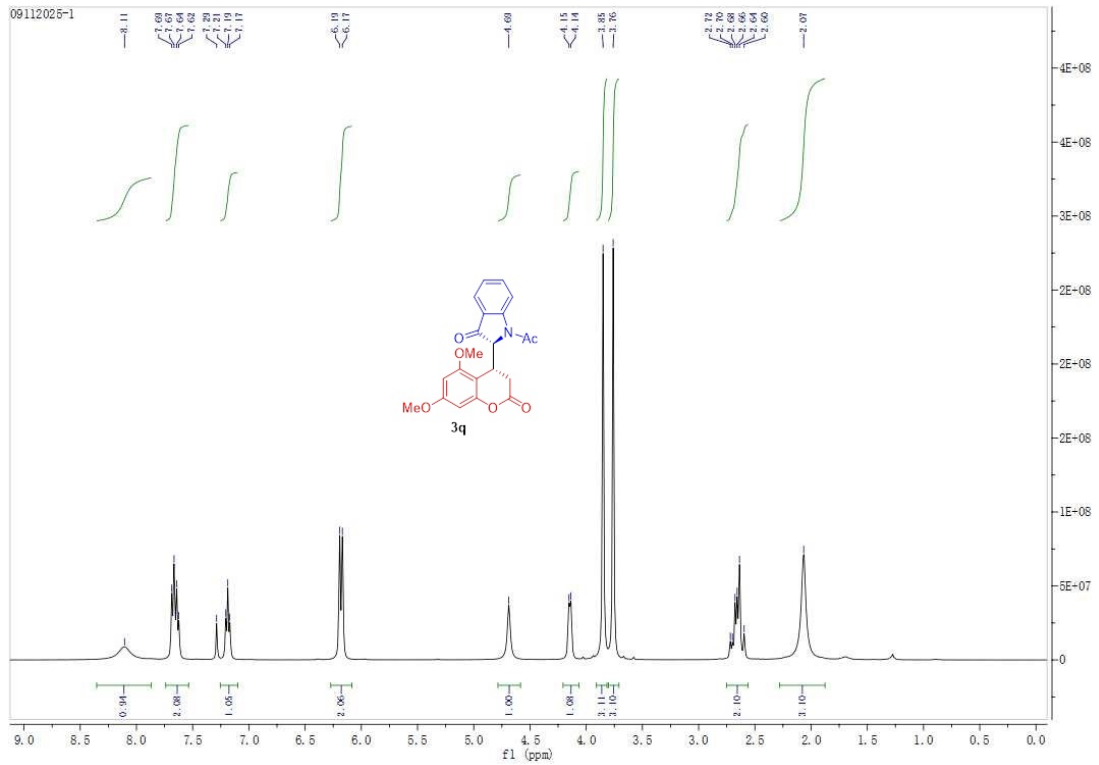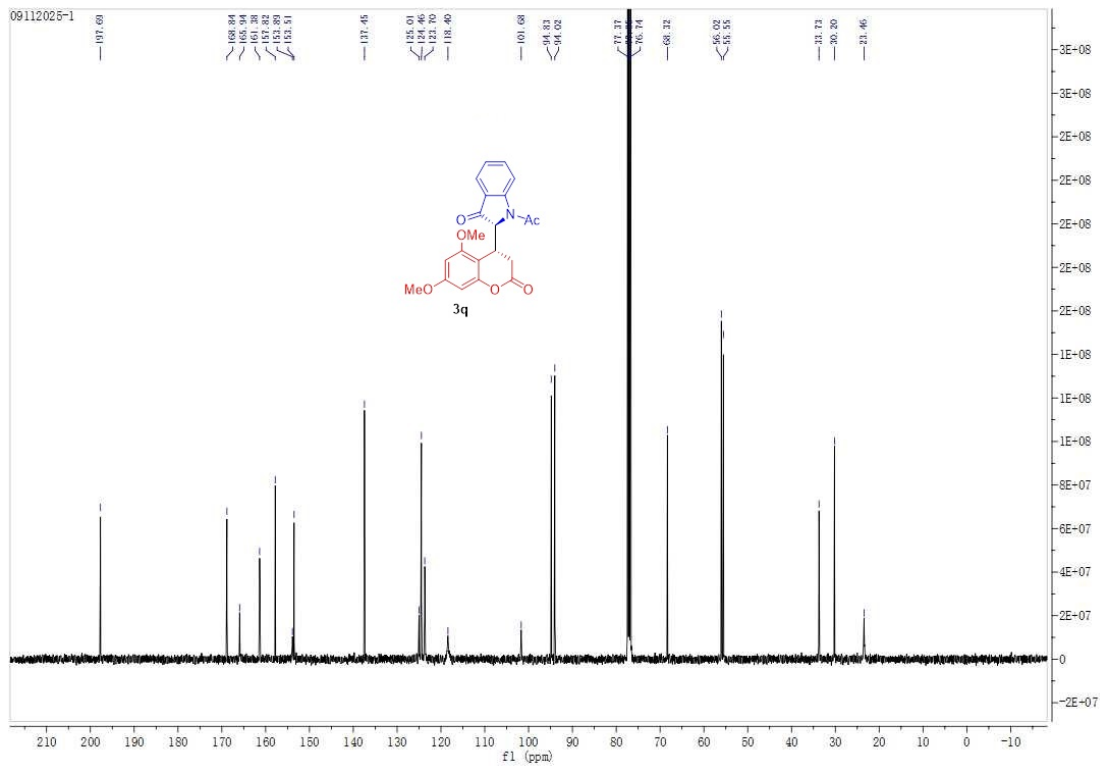

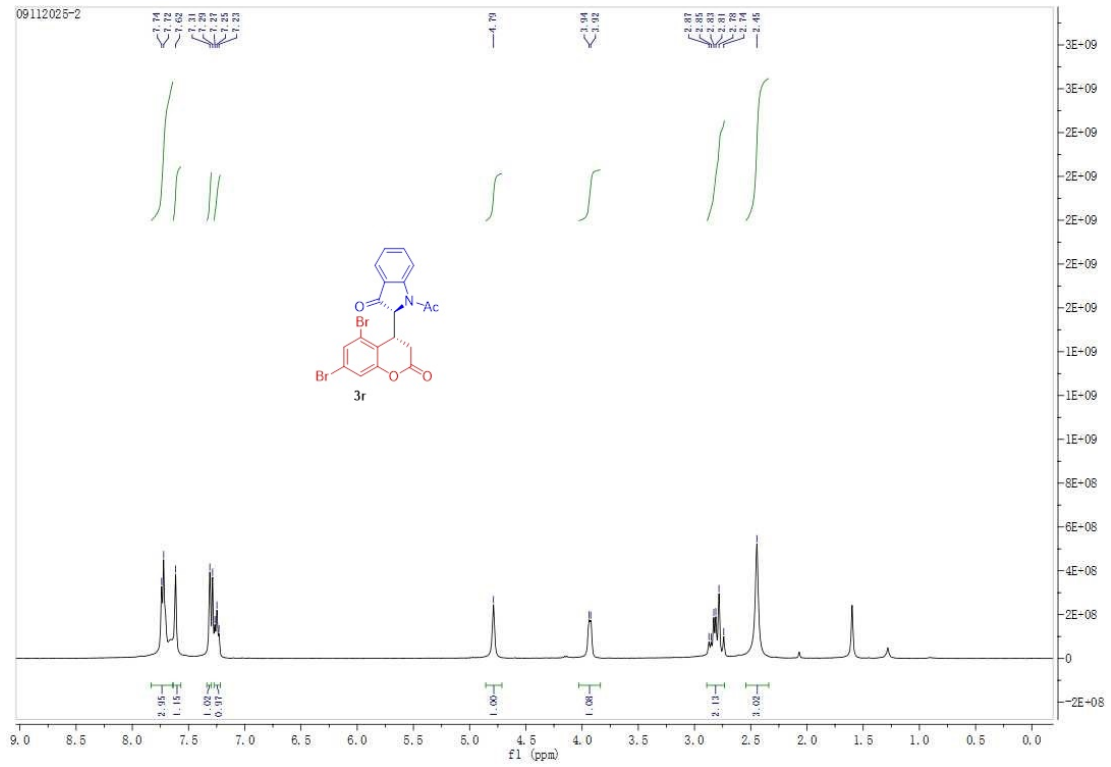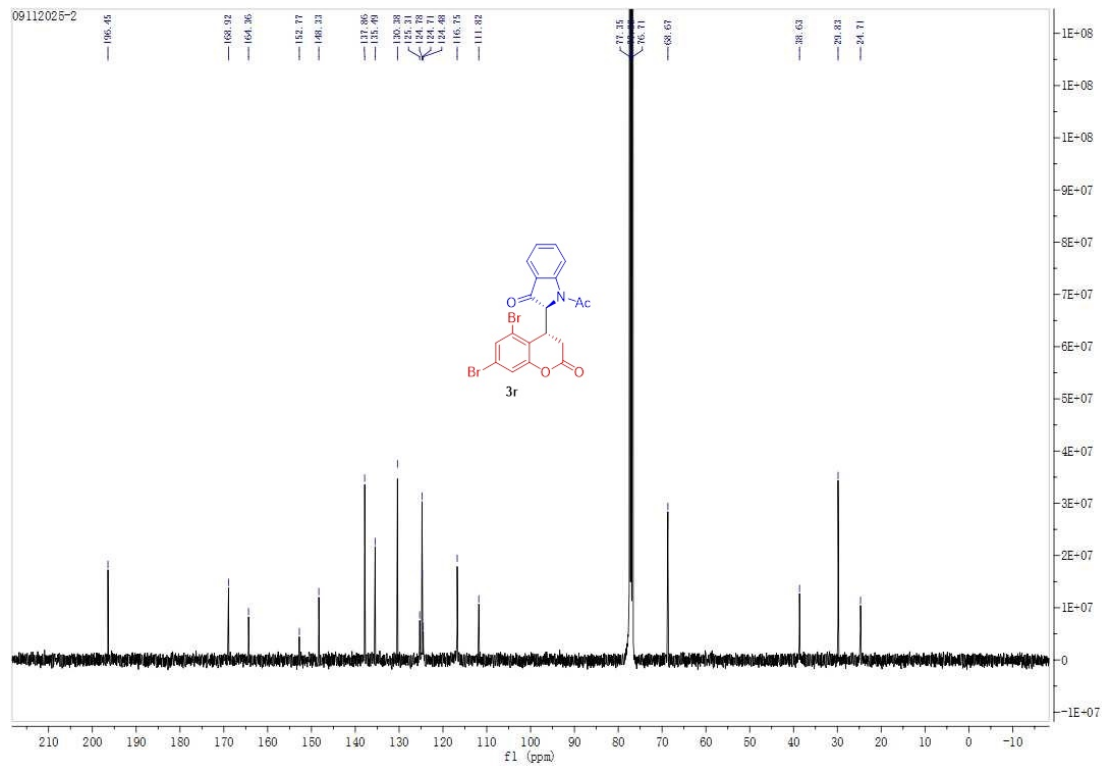

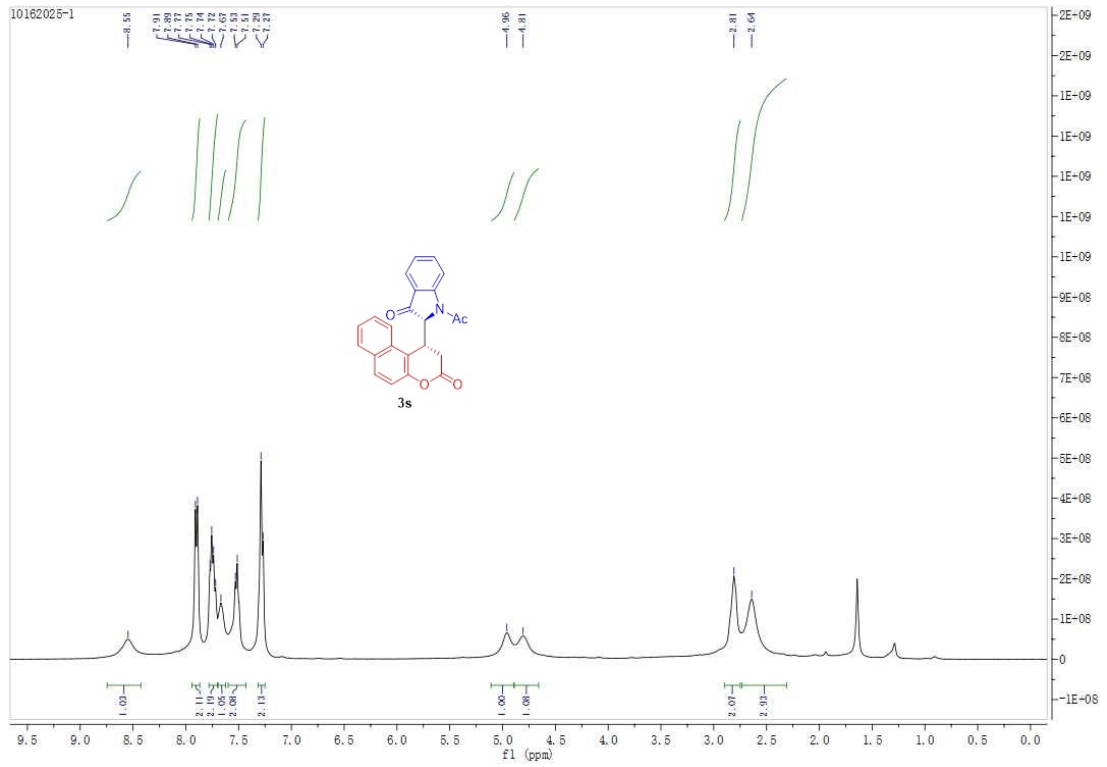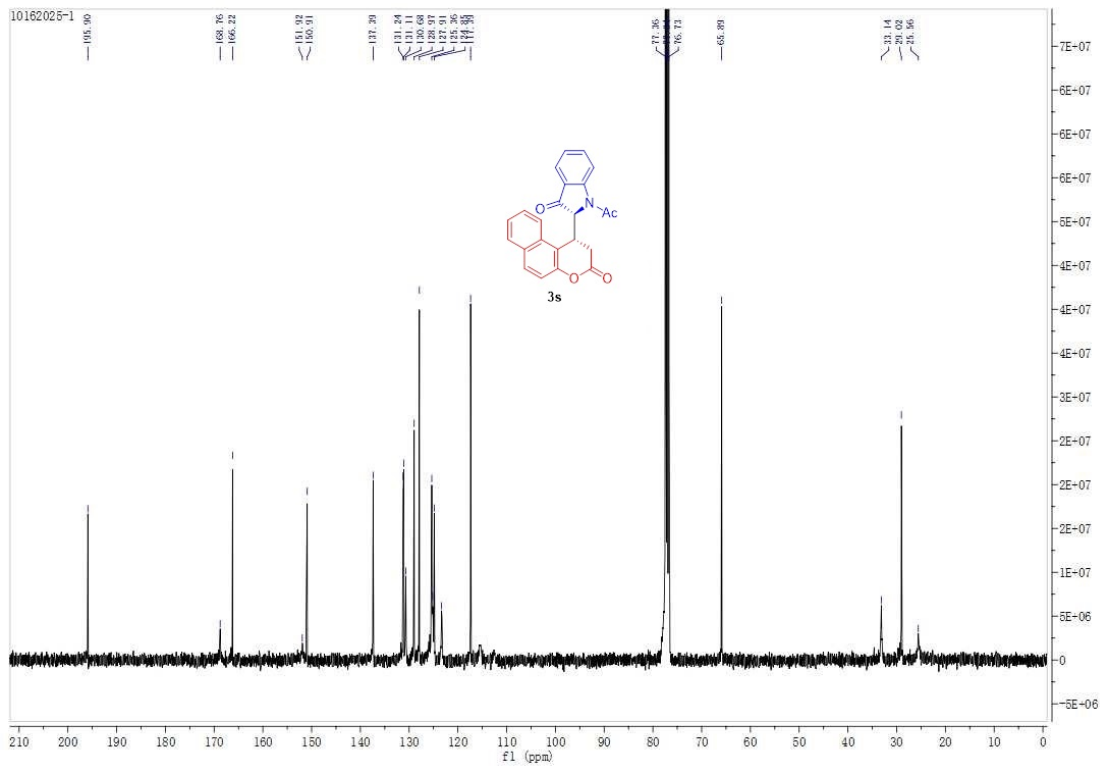

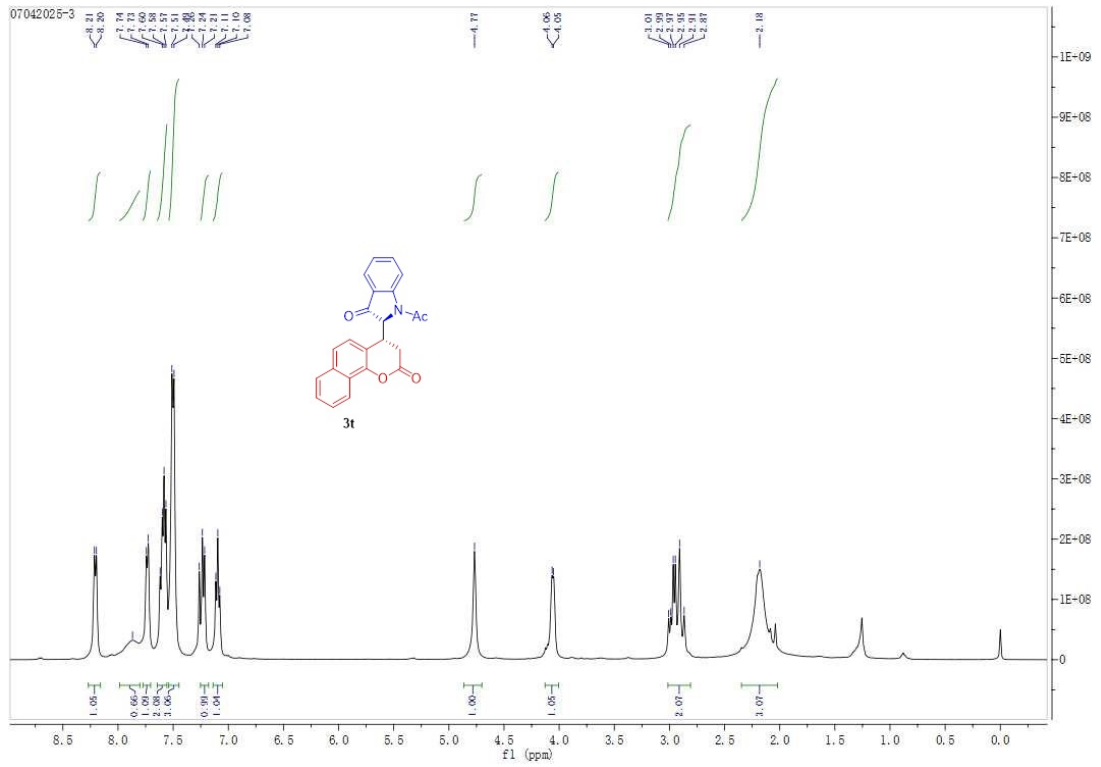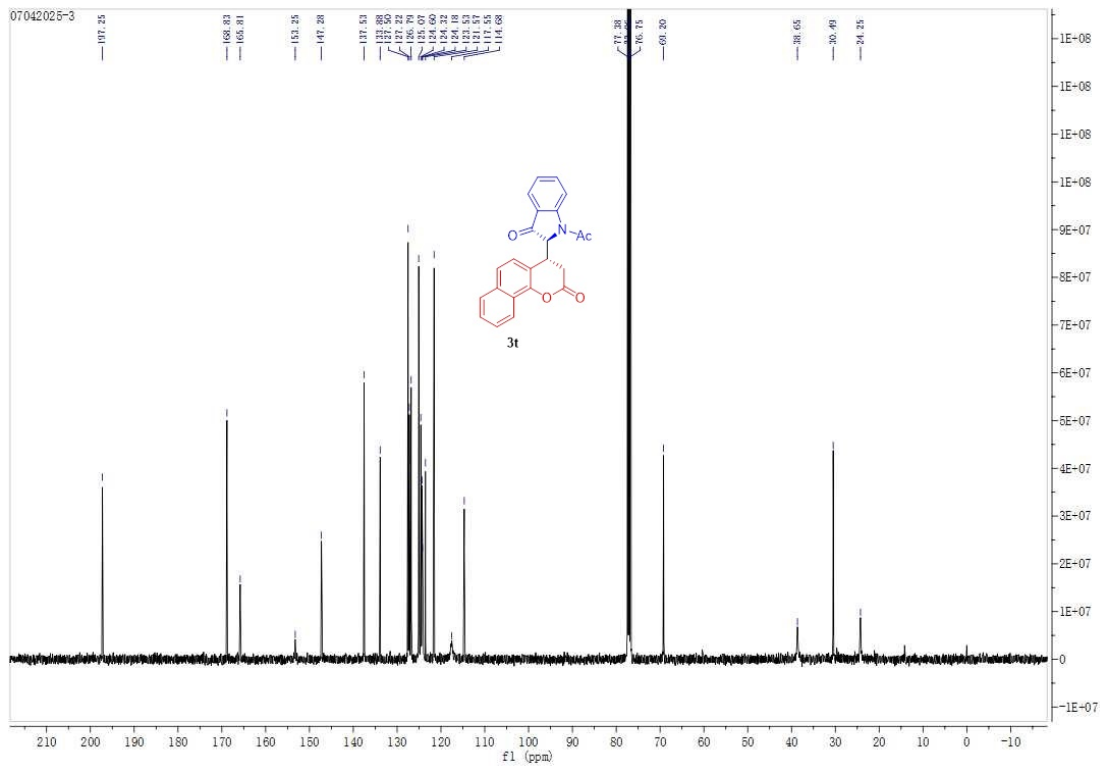

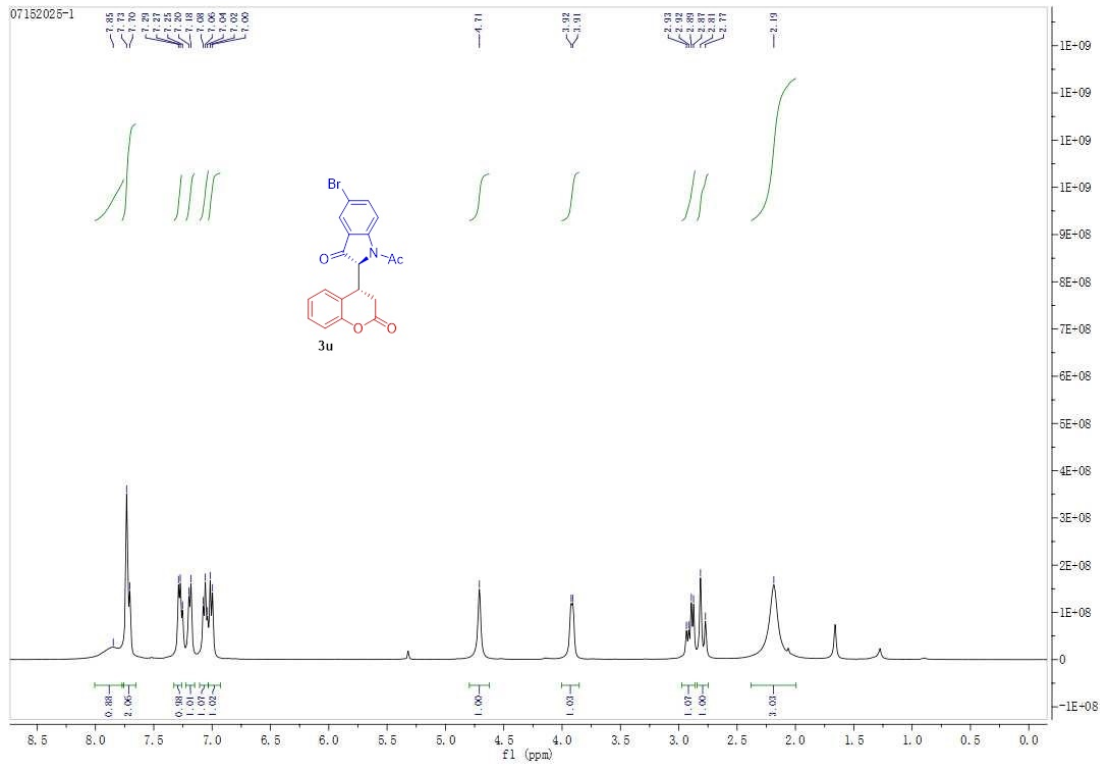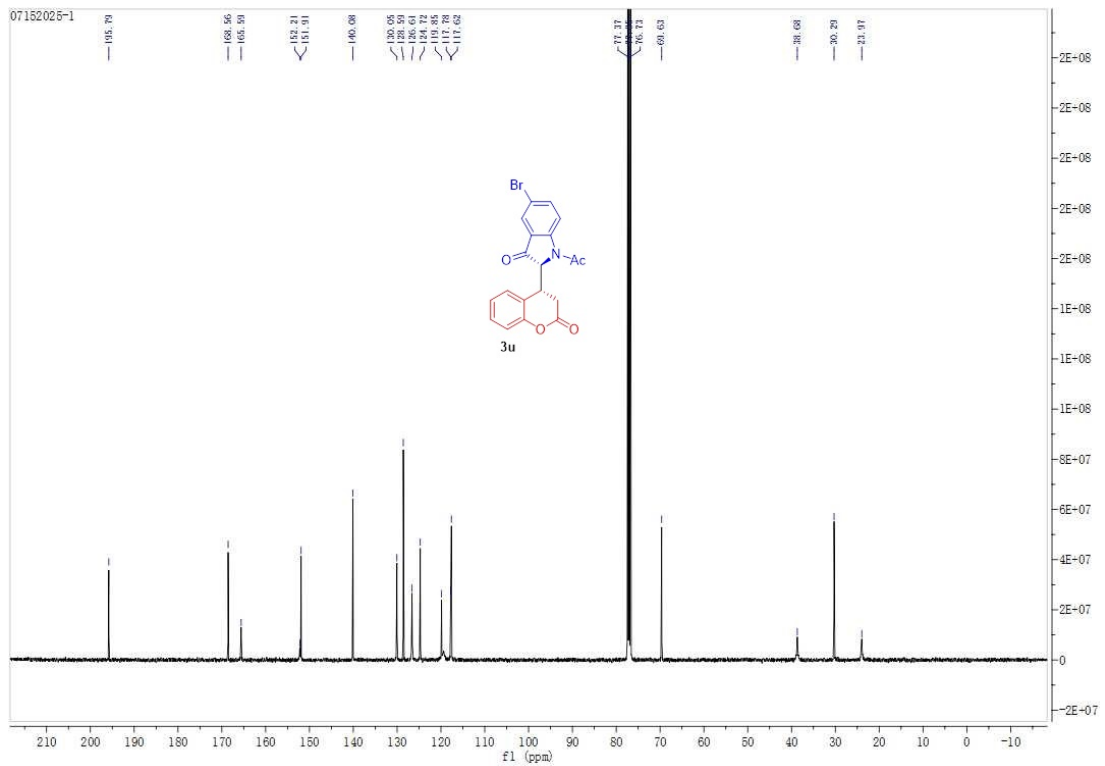

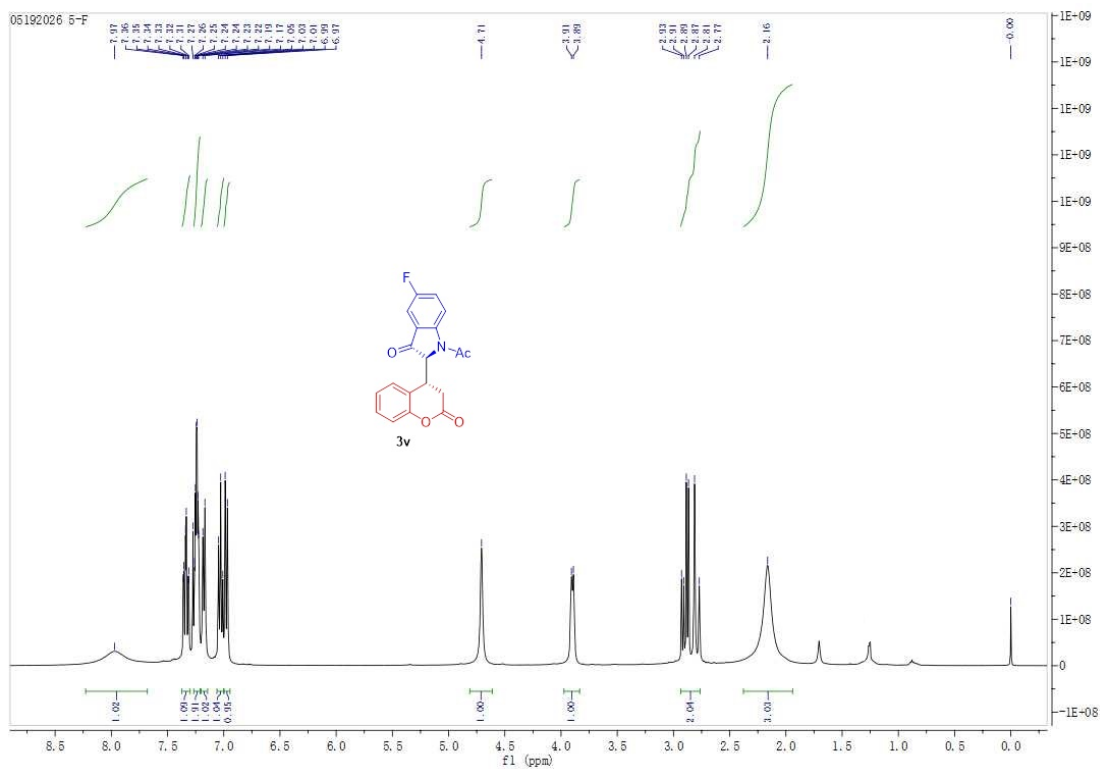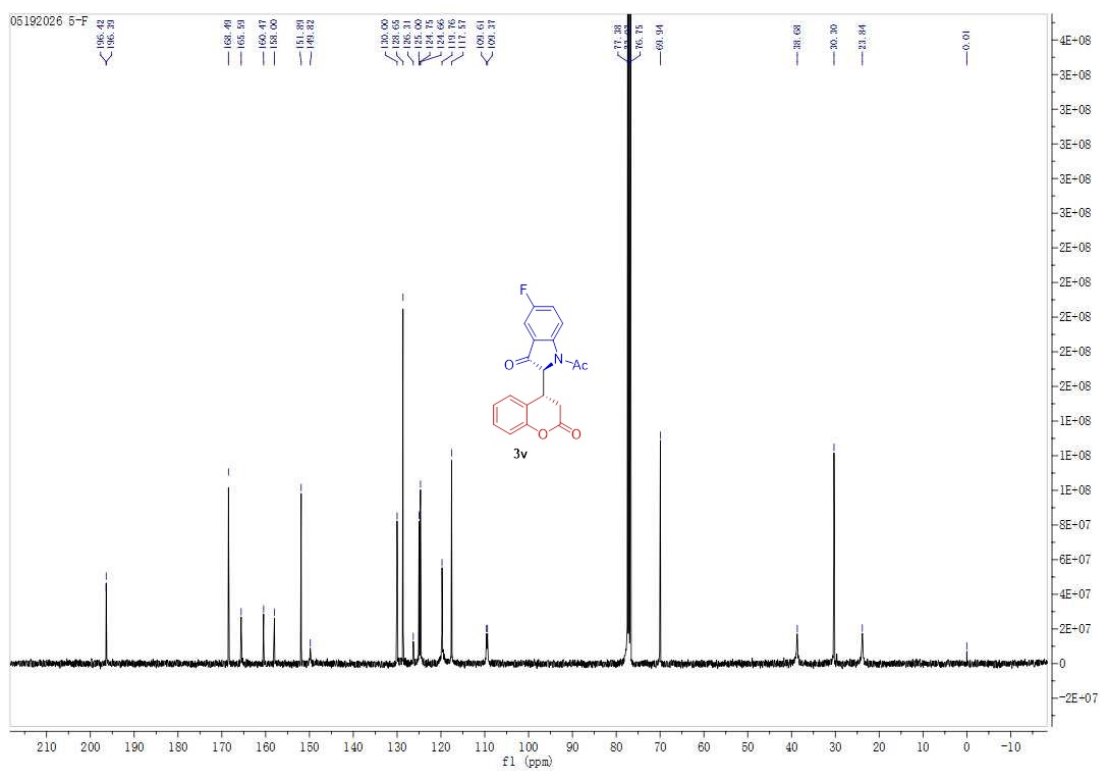

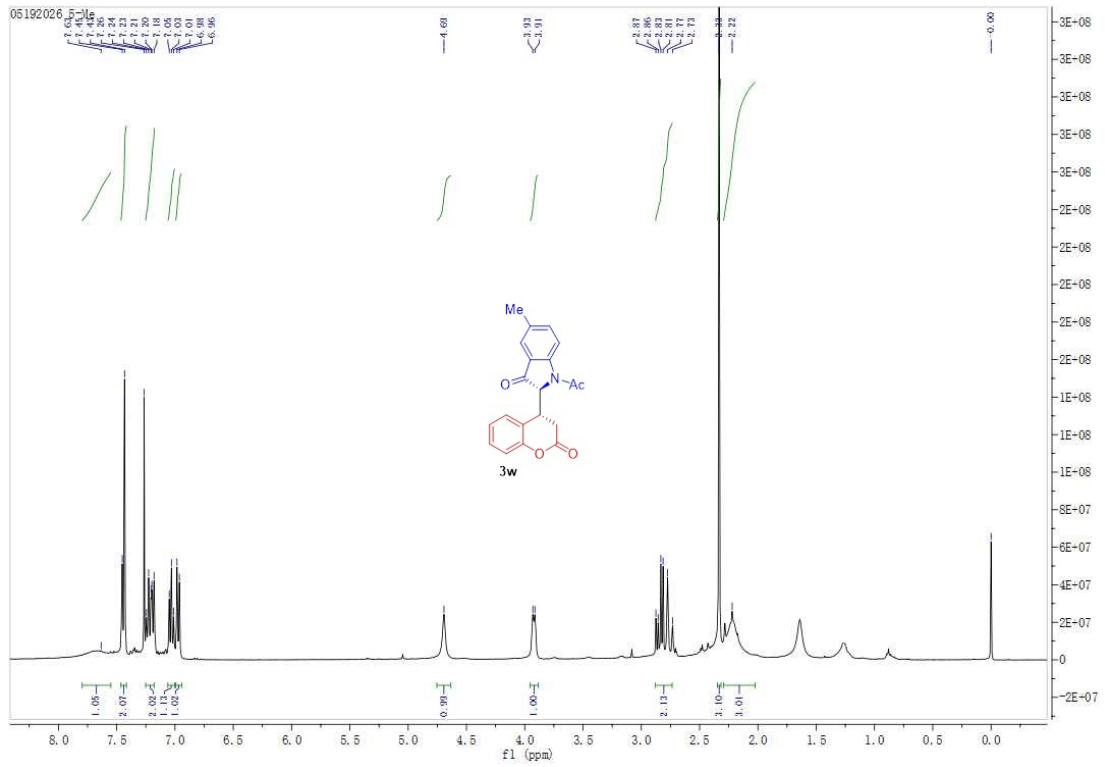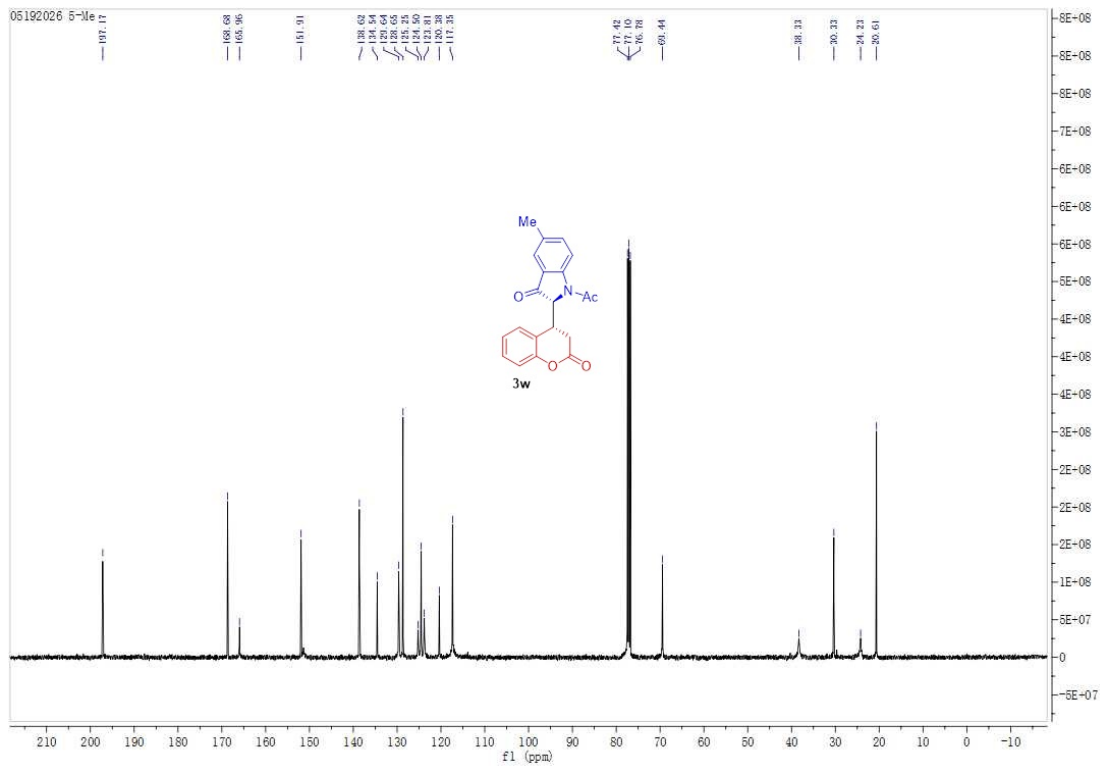

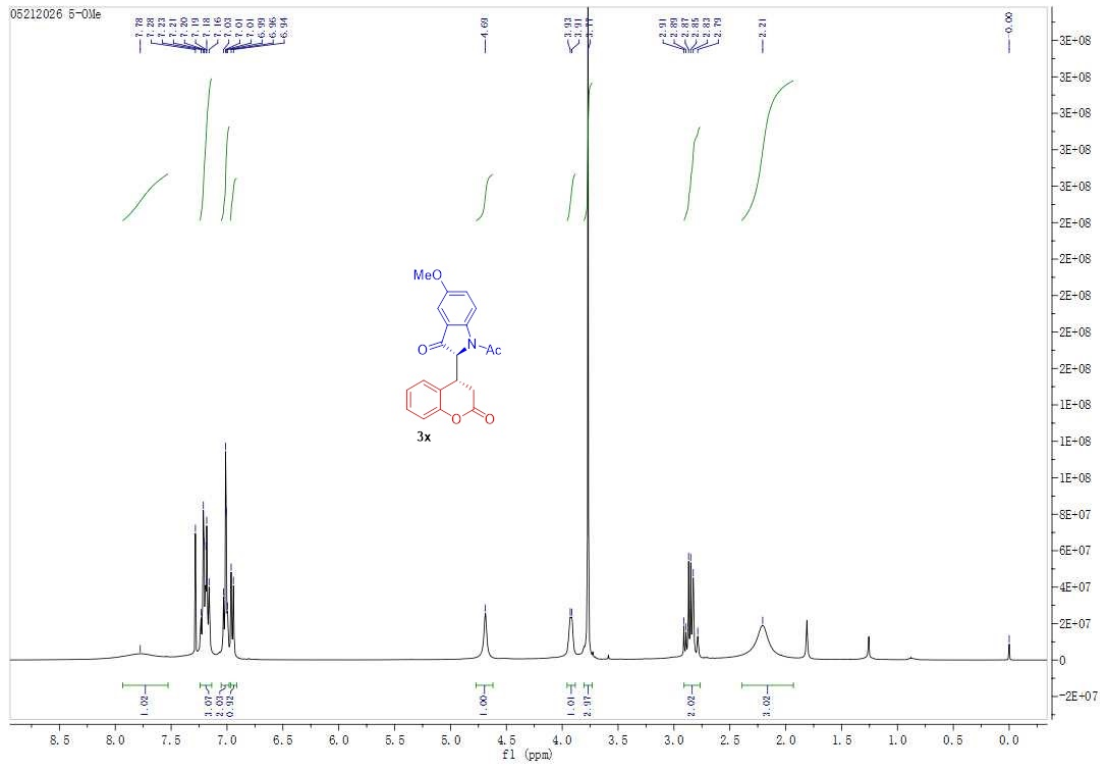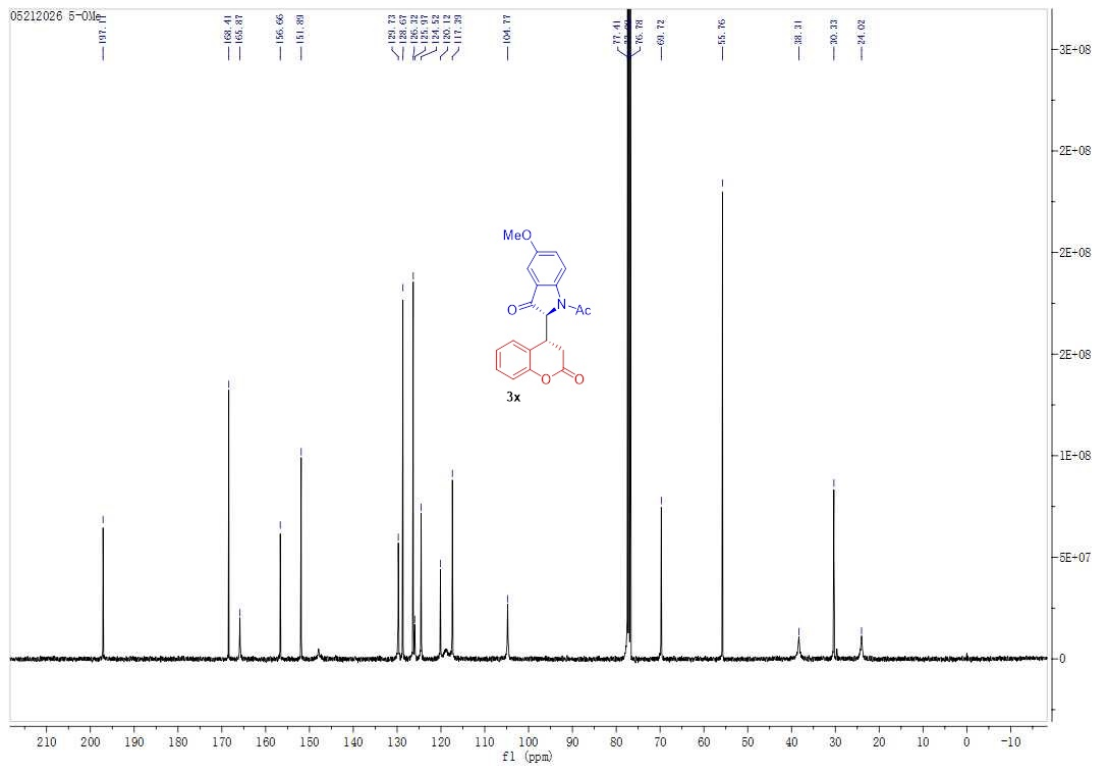

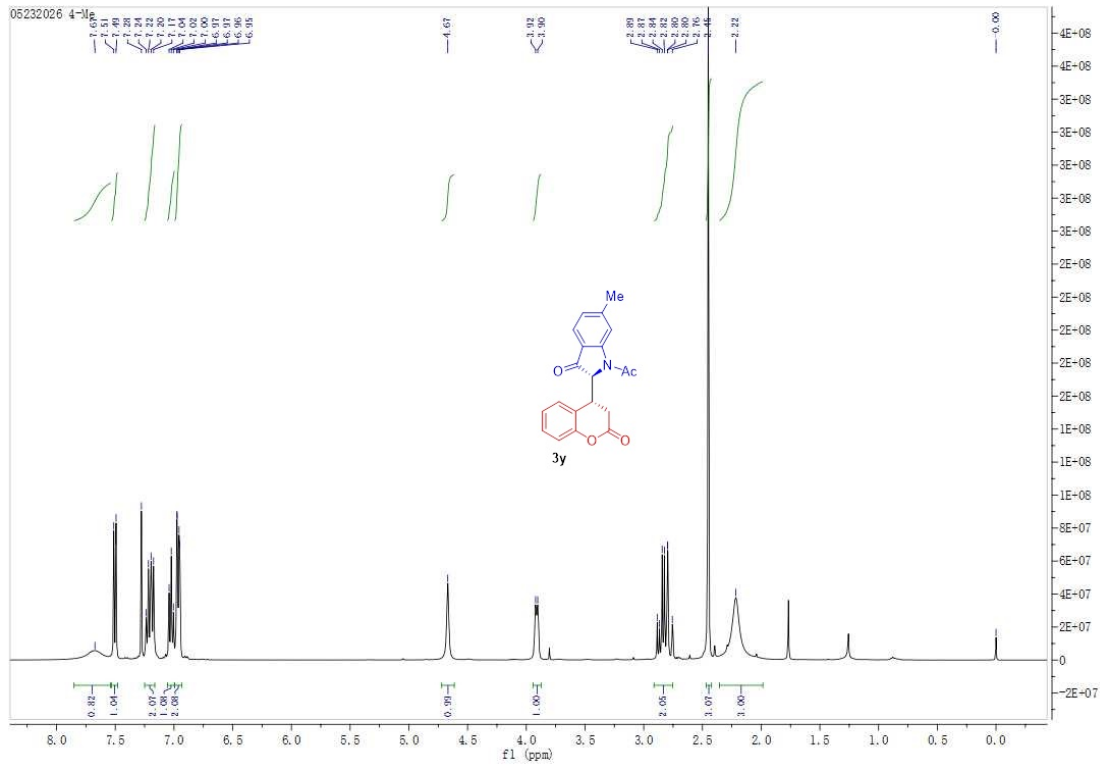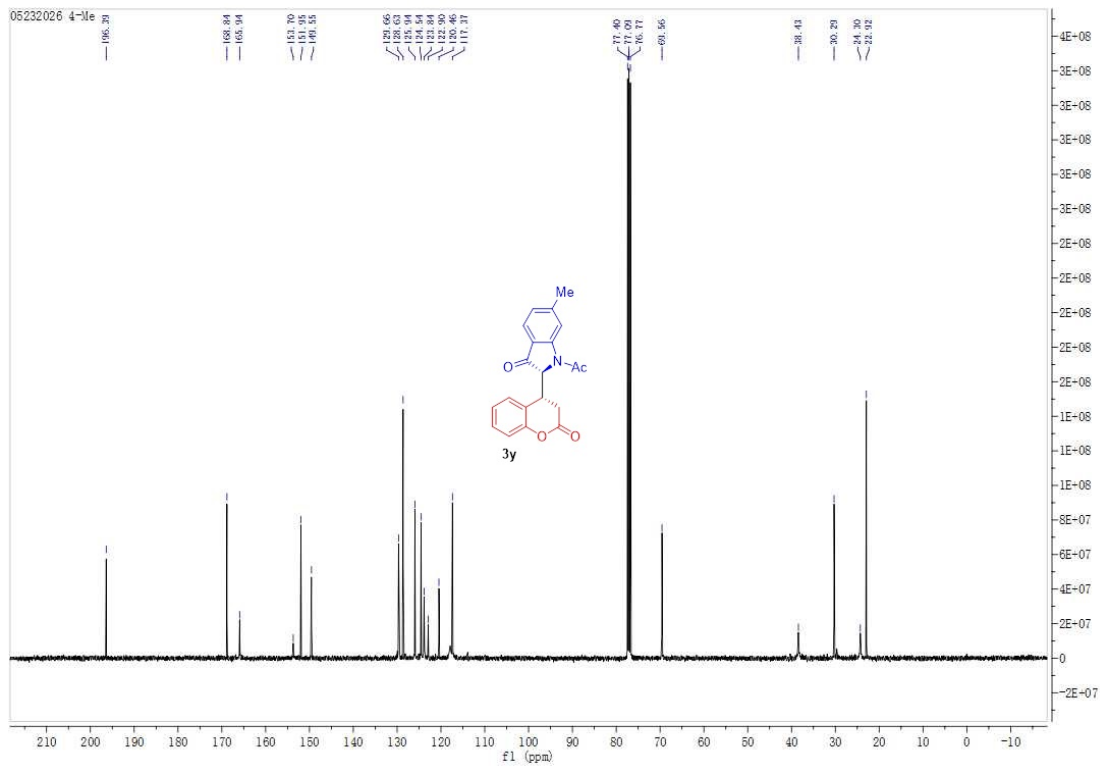

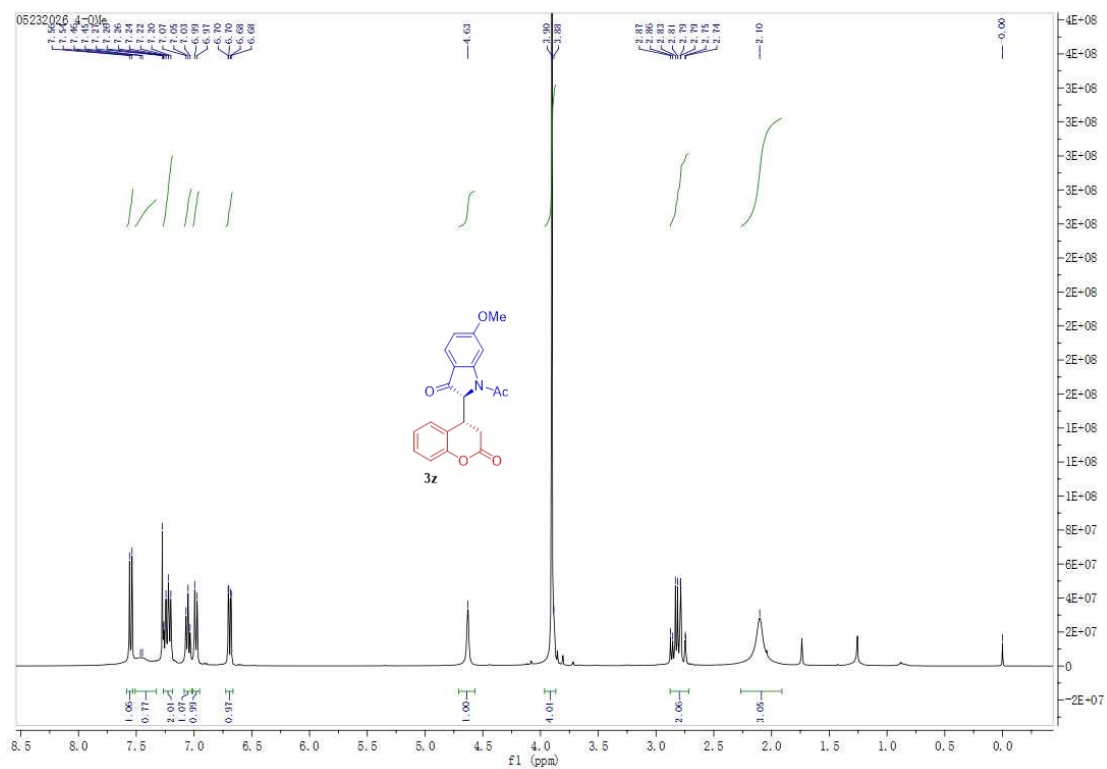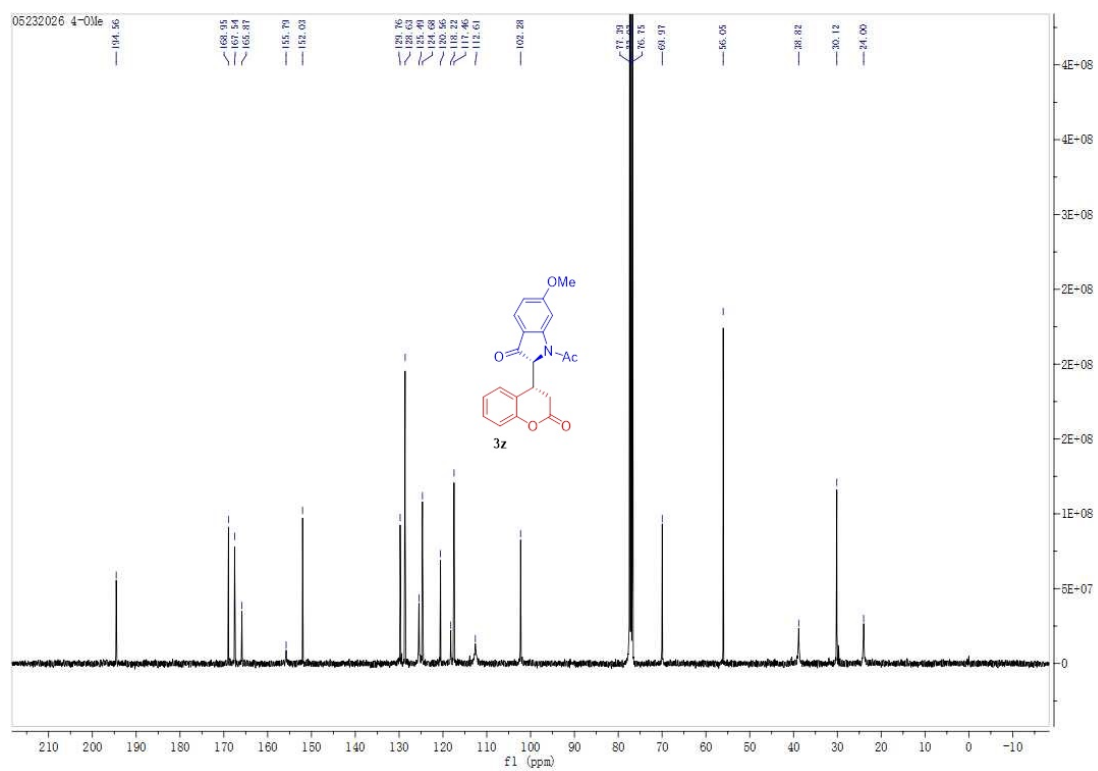

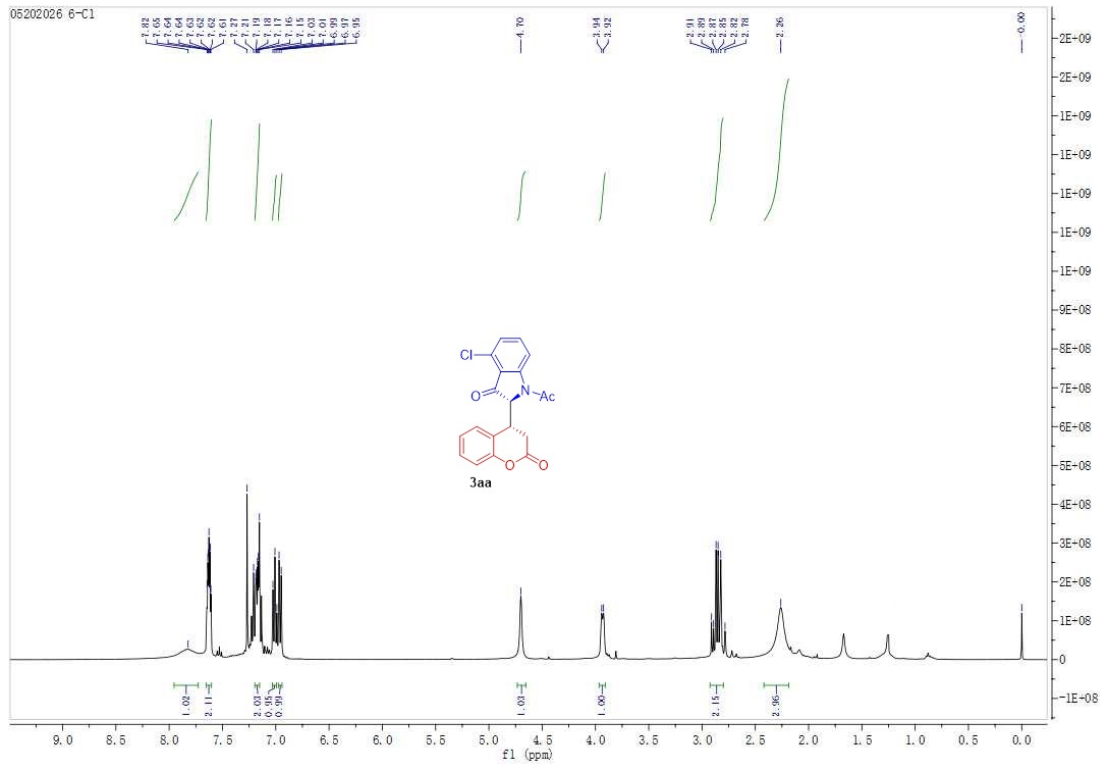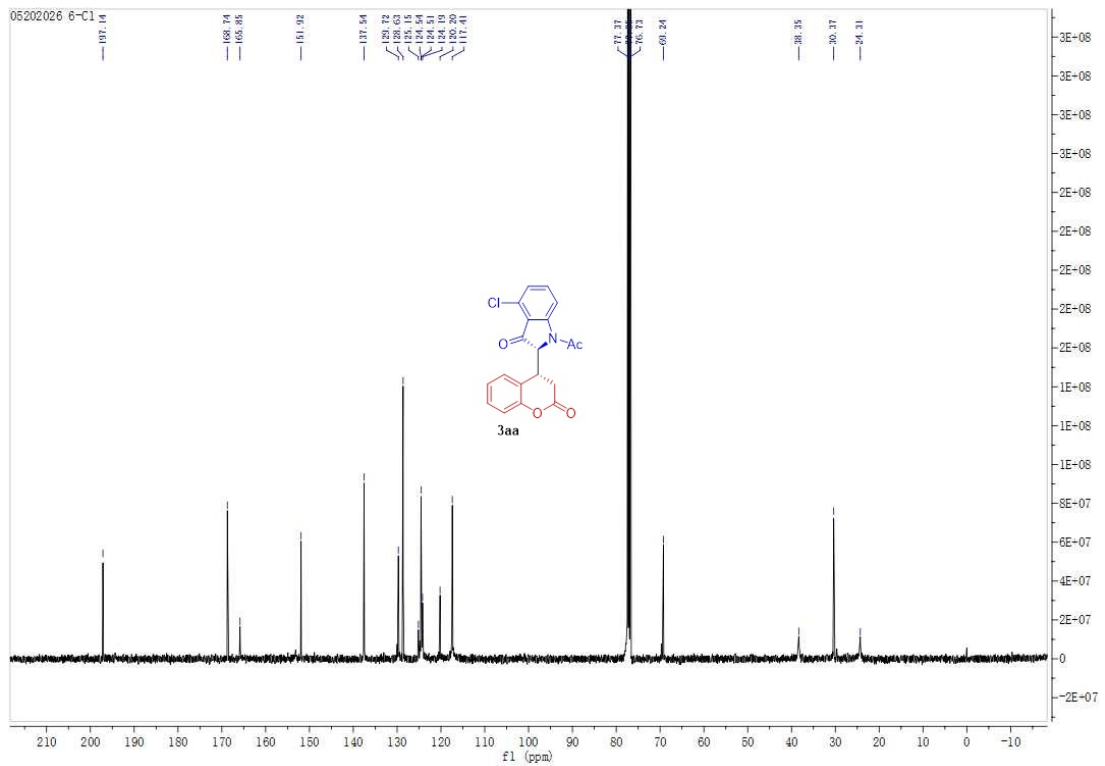

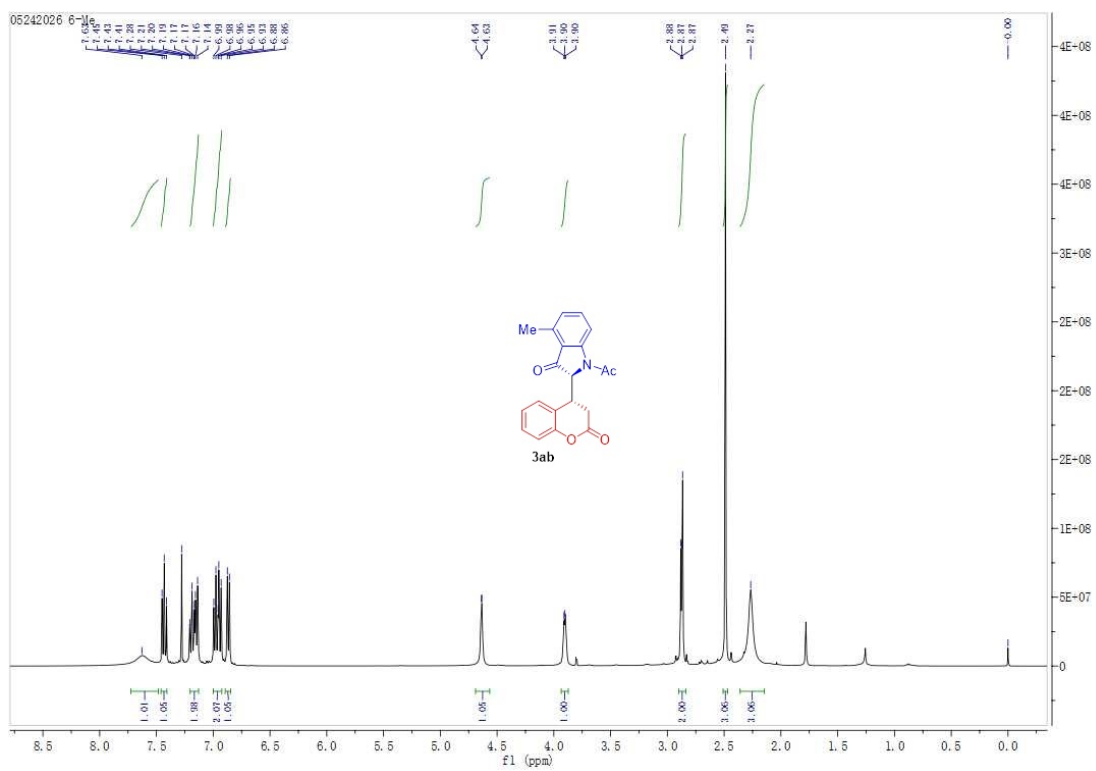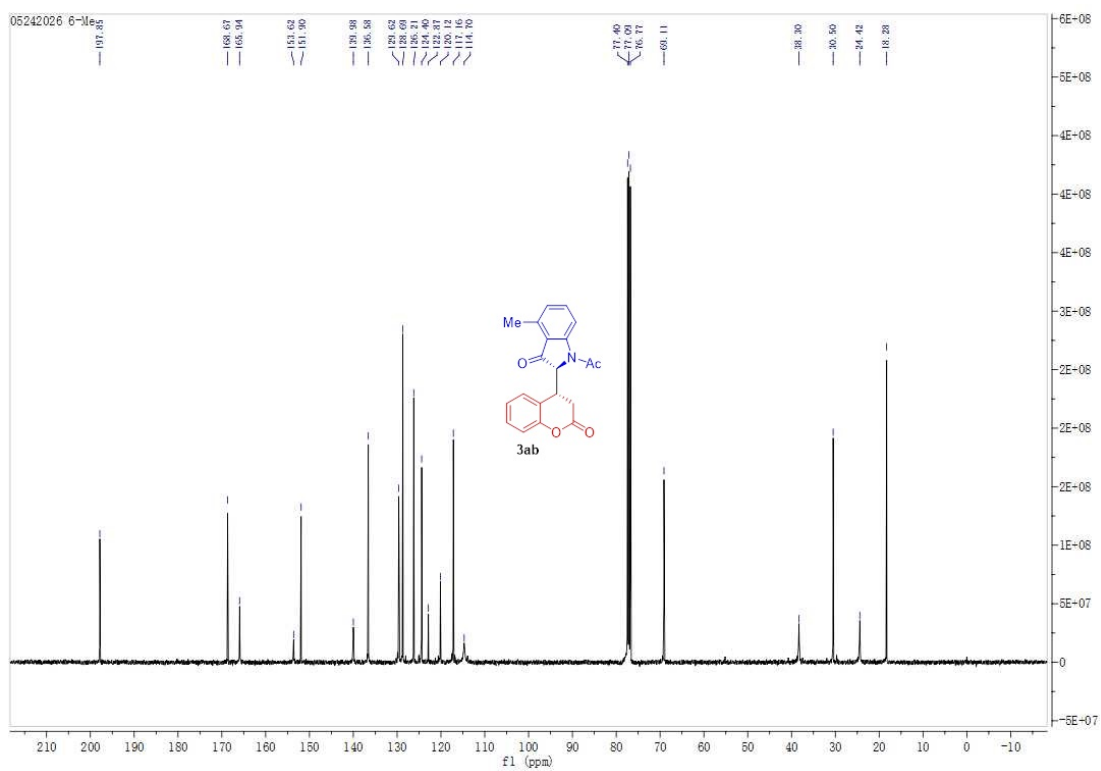

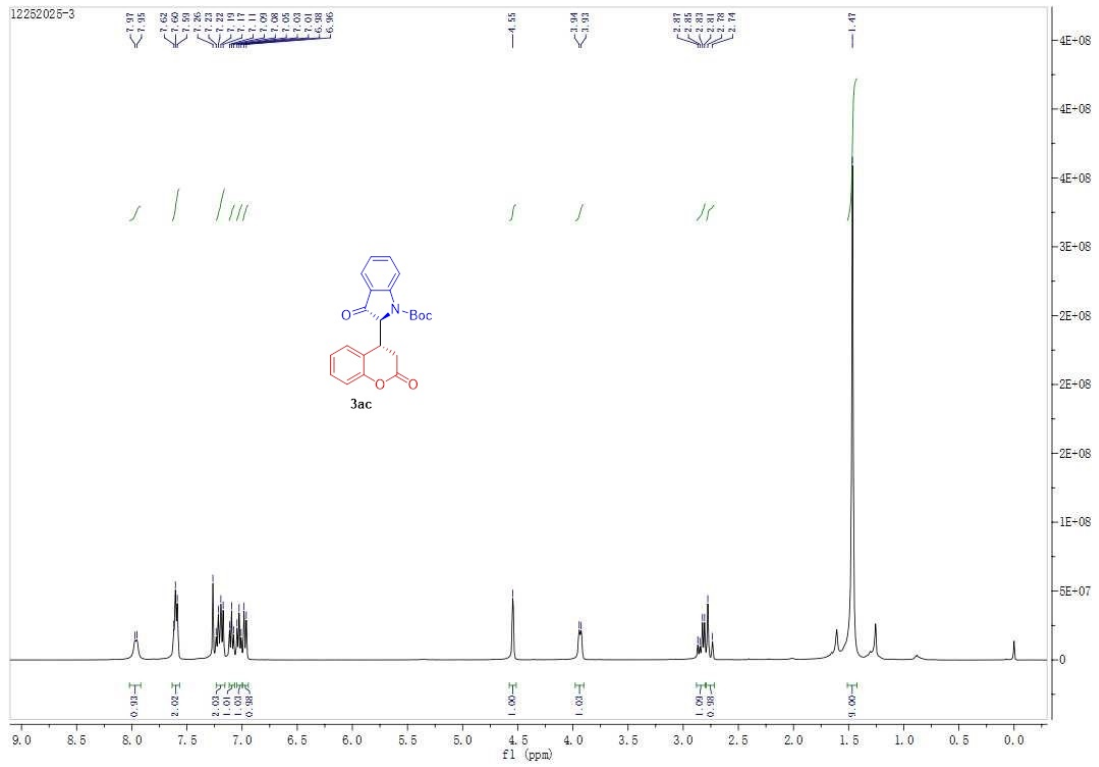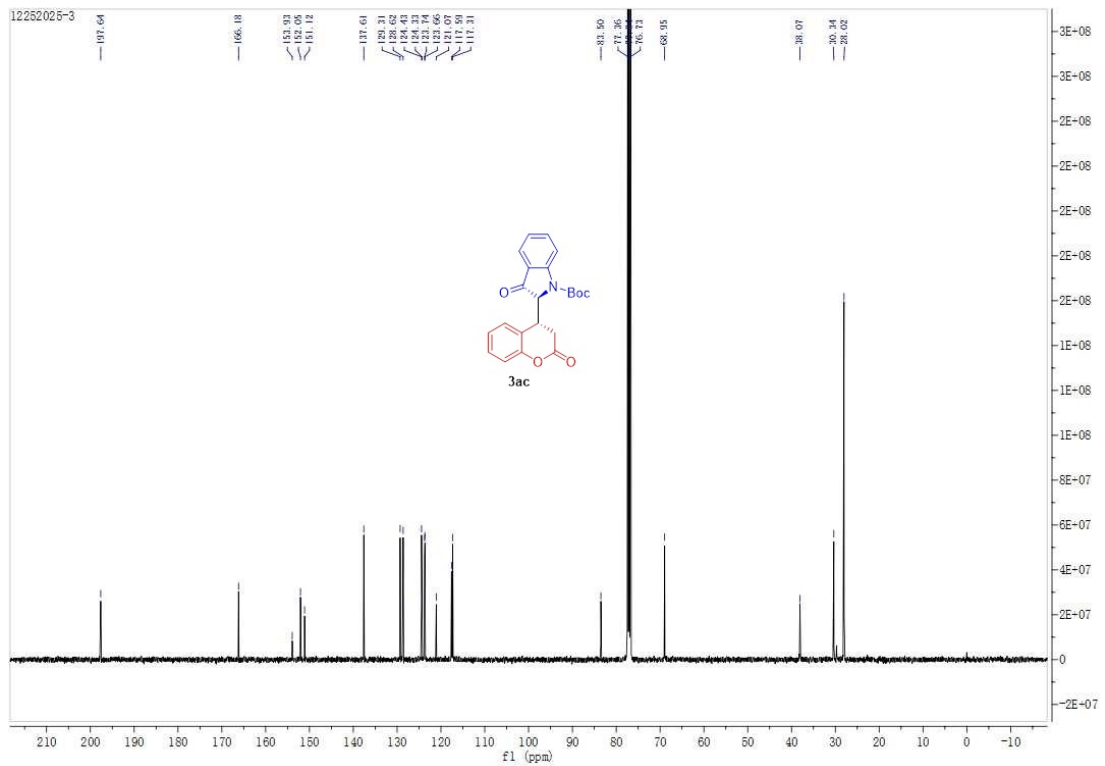

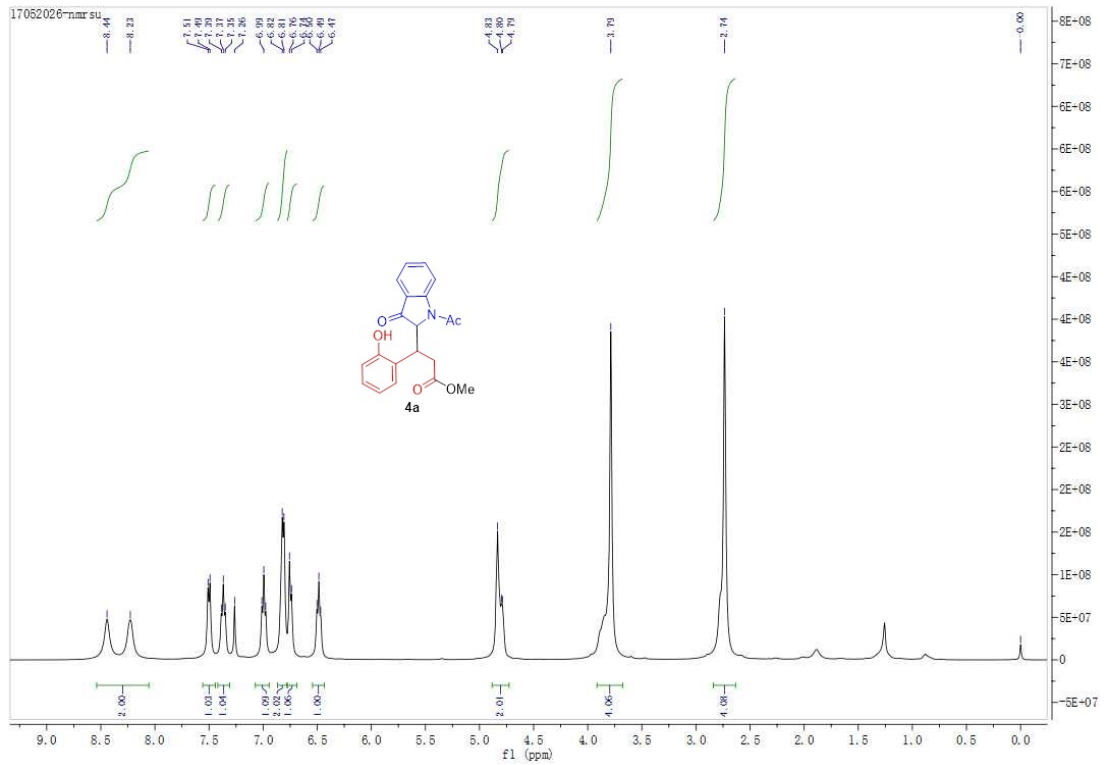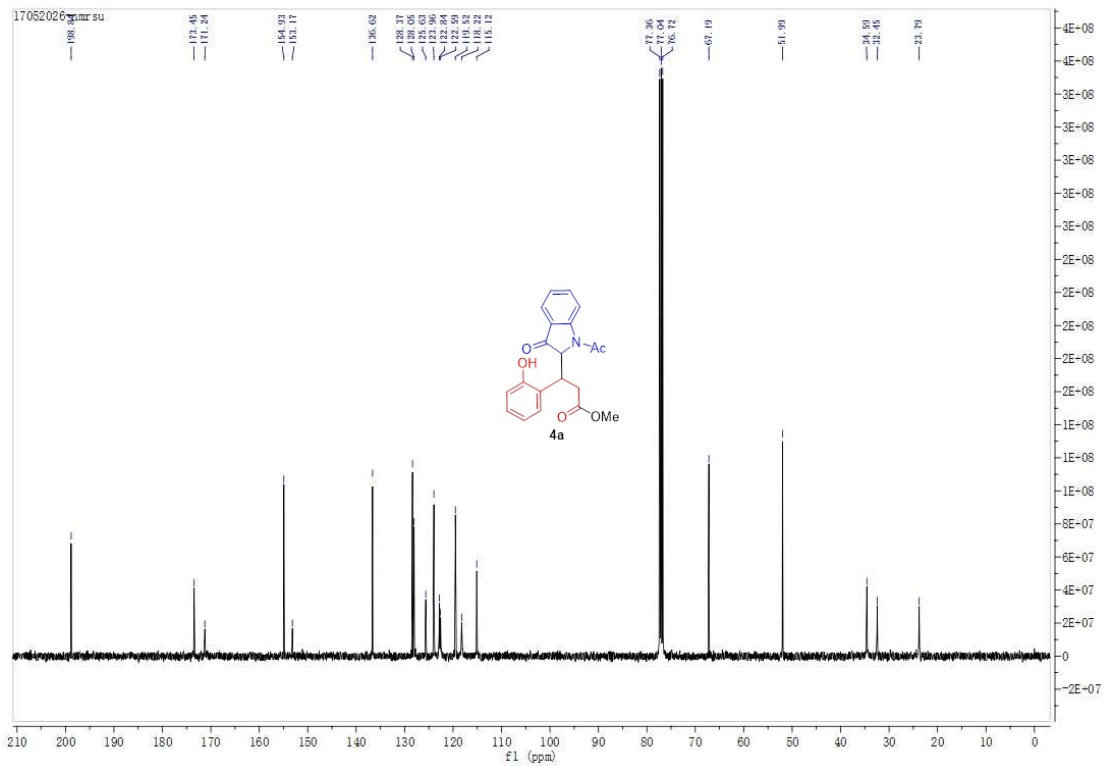

4. Scanned copies of  $^1\text{H-NMR}$  spectra of **3a** (isolated from the experiment carried out in the presence of TEMPO, BHT as a radical scavenger) and the crude spectrum of **3ac**

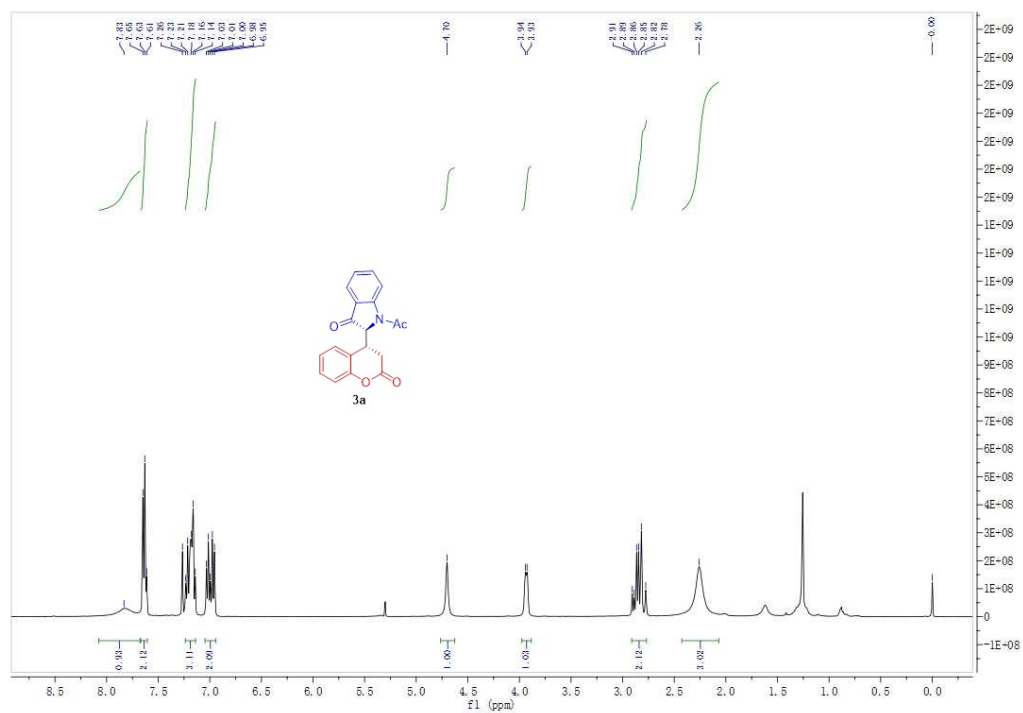

(Isolated from the experiment carried out in the presence of TEMPO as a radical scavenger)

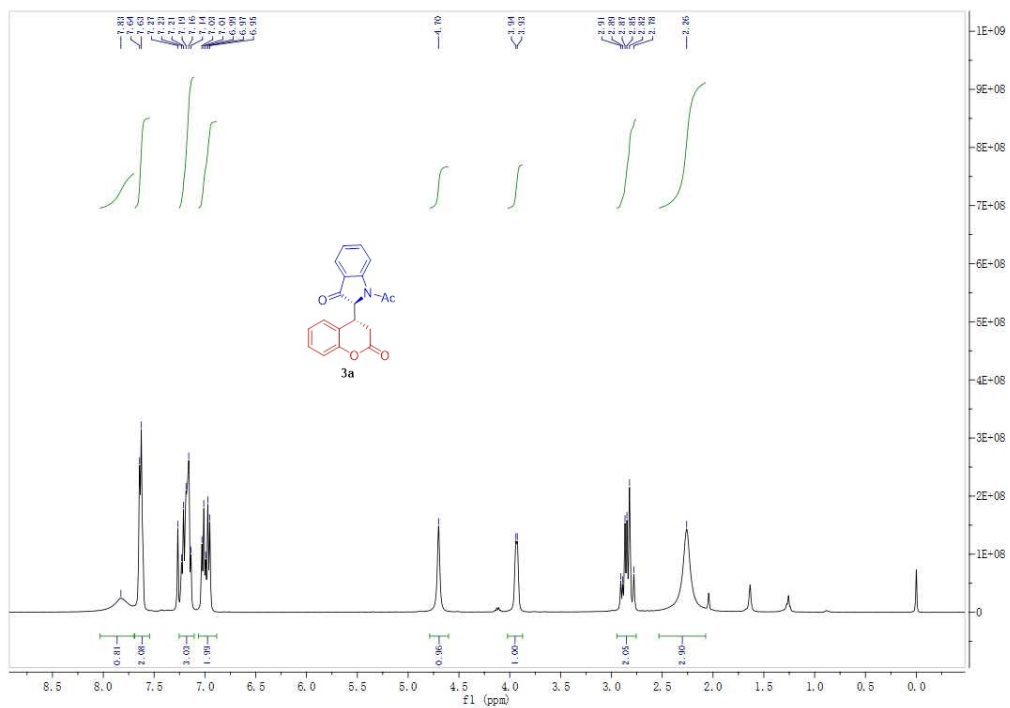

(Isolated from the experiment carried out in the presence of BHT as a radical scavenger)

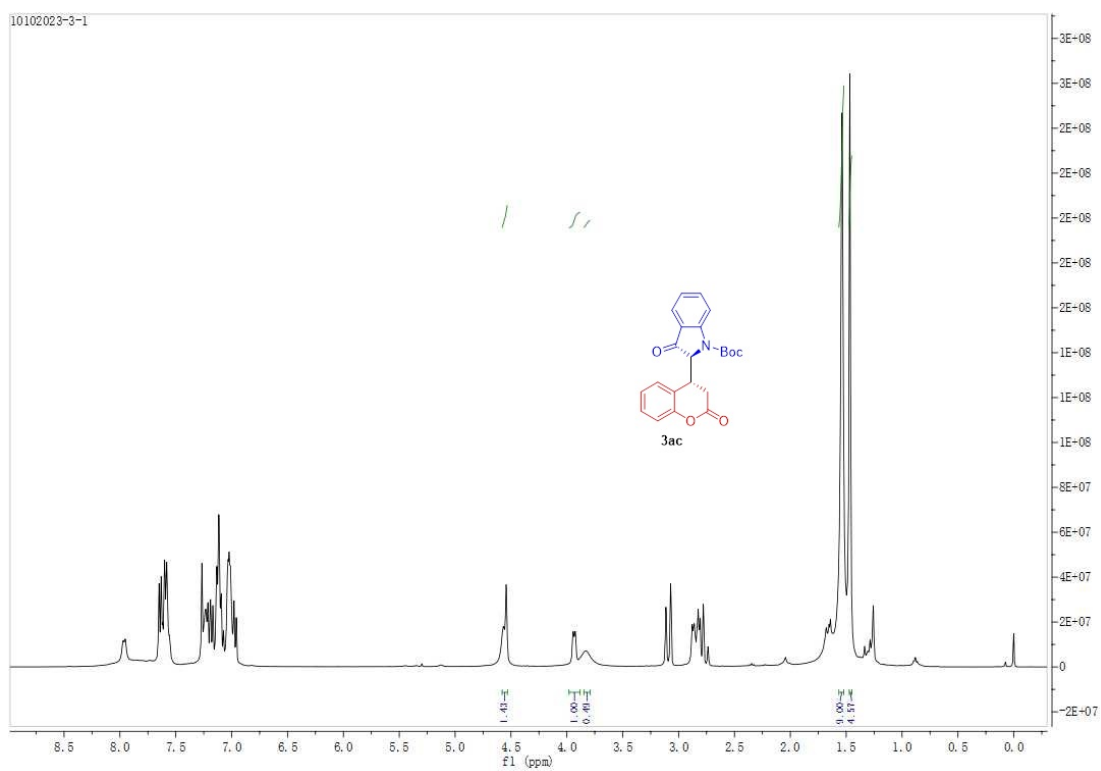

(The crude spectrum of **3ac**)

## 5. The HPLC of 3a

HPLC data of compound **3a**: AD-H column, 80:20 hexane:IPA, flow rate 1 mL/min, 254 nm, 25 °C.

|                                                                                      |          |          |        |
|--------------------------------------------------------------------------------------|----------|----------|--------|
| 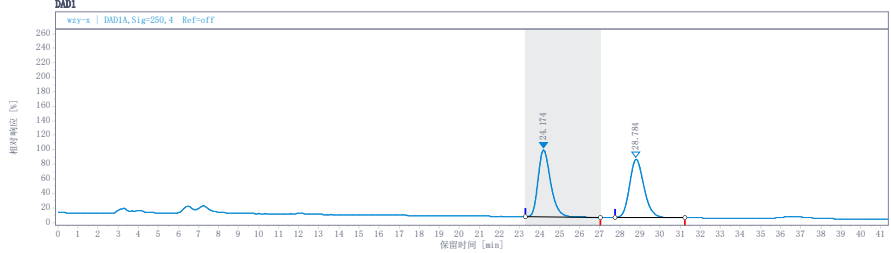   |          |          |        |
| Peak                                                                                 | Ret.time | area     | Area%  |
| 1                                                                                    | 24.174   | 1022.681 | 50.190 |
| 2                                                                                    | 28.784   | 1014.918 | 49.810 |
| CAS: 130-95-0, 15%ee                                                                 |          |          |        |
|   |          |          |        |
| Peak                                                                                 | Ret.time | area     | Area%  |
| 1                                                                                    | 23.617   | 2825.797 | 57.739 |
| 2                                                                                    | 28.169   | 2068.300 | 42.261 |
| CAS: 851477-19-5, 35%ee                                                              |          |          |        |
|  |          |          |        |
| Peak                                                                                 | Ret.time | area     | Area%  |
| 1                                                                                    | 24.186   | 7124.723 | 67.258 |
| 2                                                                                    | 28.725   | 3468.406 | 32.742 |
| CAS: 852913-25-8, 37%ee                                                              |          |          |        |

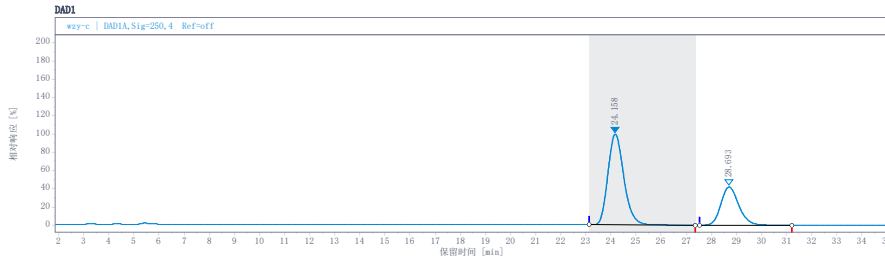

| Peak | Ret.time | area     | Area%  |
|------|----------|----------|--------|
| 1    | 24.158   | 7672.008 | 68.208 |
| 2    | 28.693   | 3575.978 | 31.792 |

## 6 The data of crystal structure

Datablock 1 - ellipsoid plot

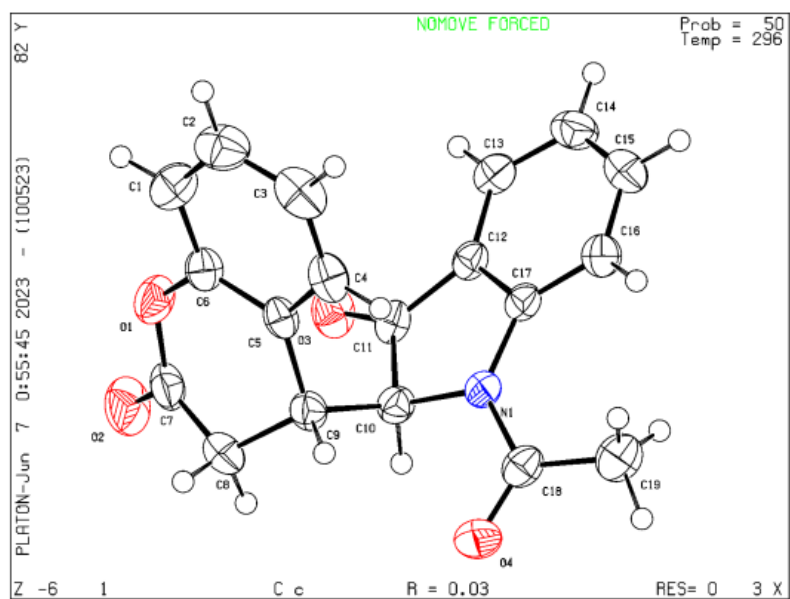

## checkCIF/PLATON report

Structure factors have been supplied for datablock(s) 1

THIS REPORT IS FOR GUIDANCE ONLY. IF USED AS PART OF A REVIEW PROCEDURE FOR PUBLICATION, IT SHOULD NOT REPLACE THE EXPERTISE OF AN EXPERIENCED CRYSTALLOGRAPHIC REFEREE.

No syntax errors found. CIF dictionary Interpreting this report

### Datablock: 1

---

|                    |                |                    |               |
|--------------------|----------------|--------------------|---------------|
| Bond precision:    | C-C = 0.0034 A | Wavelength=0.71073 |               |
| Cell:              | a=11.3469(11)  | b=13.9960(14)      | c=9.8736(10)  |
|                    | alpha=90       | beta=106.705(2)    | gamma=90      |
| Temperature:       | 296 K          |                    |               |
|                    | Calculated     | Reported           |               |
| Volume             | 1501.9(3)      | 1501.9(3)          |               |
| Space group        | C c            | C c                |               |
| Hall group         | C -2yc         | C -2yc             |               |
| Moiety formula     | C19 H15 N O4   | ?                  |               |
| Sum formula        | C19 H15 N O4   | C19 H15 N O4       |               |
| Mr                 | 321.32         | 321.32             |               |
| Dx, g cm-3         | 1.421          | 1.421              |               |
| Z                  | 4              | 4                  |               |
| Mu (mm-1)          | 0.101          | 0.101              |               |
| F000               | 672.0          | 672.0              |               |
| F000'              | 672.35         |                    |               |
| h, k, lmax         | 13, 16, 11     | 13, 16, 11         |               |
| Nref               | 2648[ 1328]    | 2409               |               |
| Tmin, Tmax         | 0.974, 0.978   |                    |               |
| Tmin'              | 0.974          |                    |               |
| Correction method= | Not given      |                    |               |
| Data completeness= | 1.81/0.91      | Theta(max)=        | 24.997        |
| R(reflections)=    | 0.0283( 2296)  | wR2(reflections)=  | 0.0673( 2409) |
| S =                | 1.070          | Npar=              | 218           |
